# Supplementary material for: Iron-catalyzed C(sp3)–H phosphorylation via photoinduced LMCT
Source: Royal Society of Chemistry journal article supplement (doi:10.1039/d3qo02121a), 2024-01-01

## Supplementary Information for

### **Iron-Catalyzed C(sp<sup>3</sup>)-H Phosphorylation via Photoinduced LMCT**

Hongchi Liu,<sup>b</sup> Kaifang Wang,<sup>a</sup> Sunfeng Ye,<sup>b</sup> Qiming Zhu,<sup>\*a</sup> and Hanmin Huang<sup>\*b</sup>

<sup>a</sup> *Institution Guangxi Key Laboratory of Natural Polymer Chemistry and Physics, College of Chemistry and Materials, Nanning Normal University, Nanning 530100 P. R. China*

<sup>b</sup> *Key Laboratory of Precision and Intelligent Chemistry, Department of Chemistry, University of Science and Technology of China, Hefei, Anhui 230026, P. R. China.*

\*Corresponding author: [hanmin@ustc.edu.cn](mailto:hanmin@ustc.edu.cn); [zhqm18@163.com](mailto:zhqm18@163.com)

#### **Table of contents**

|           |                                                                 |           |
|-----------|-----------------------------------------------------------------|-----------|
| <b>1.</b> | <b>General Information.....</b>                                 | <b>2</b>  |
| <b>2.</b> | <b>Optimization of the Reaction Conditions .....</b>            | <b>3</b>  |
| <b>3.</b> | <b>General procedure and spectral data of the products.....</b> | <b>4</b>  |
| <b>4.</b> | <b>Mechanistic Studies .....</b>                                | <b>15</b> |
| <b>5.</b> | <b>NMR Spectra of Products .....</b>                            | <b>27</b> |

---

## 1. General Information

All non-aqueous reactions and manipulations were using standard Schlenk techniques. All solvents before using were dried by standard methods and stored under N<sub>2</sub> atmosphere. All reactions were monitored by TLC with silica gel-coated plates. NMR spectra were recorded on BRUKER Avance III 400 MHz or 500 MHz NMR spectrometers. Chemical shifts were reported in parts per million (ppm) down field from TMS with the solvent resonance as the internal standard. NMR data are reported as follows: chemical shift, multiplicity, coupling constants (Hz) and integration. Coupling constants (*J*) were reported in Hz and referred to apparent peak multiplications. High resolution mass spectra (HRMS) were recorded on Bruker Micro TOF-QII mass instrument (ESI). All commercially available compounds were purchased from Adamas or Energy Chemical. Flash column chromatography was performed using 200-300 mesh silica gels.

## 2. Optimization of the Reaction Conditions

**Table S1.** Screening of temperature and solvents<sup>a</sup>

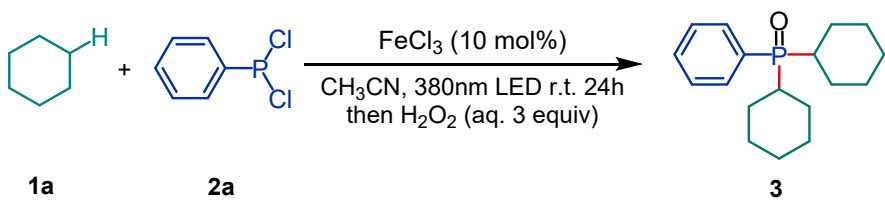

**1a** + **2a**  $\xrightarrow[\text{CH}_3\text{CN, 380nm LED r.t. 24h, then H}_2\text{O}_2 \text{ (aq. 3 equiv)}]{\text{FeCl}_3 \text{ (10 mol\%)}}$  **3**

| entry | Deviation from Standard Condition                                               | yield (%) <sup>b</sup> |
|-------|---------------------------------------------------------------------------------|------------------------|
| 1     | none                                                                            | 86                     |
| 2     | CuCl <sub>2</sub> instead of FeCl <sub>3</sub>                                  | < 5                    |
| 3     | (Et <sub>4</sub> N) <sub>2</sub> CeCl <sub>6</sub> instead of FeCl <sub>3</sub> | < 5                    |
| 4     | (PPh <sub>4</sub> ) <sub>2</sub> TiCl <sub>6</sub> instead of FeCl <sub>3</sub> | 10                     |
| 5     | 5 mol% FeCl <sub>3</sub>                                                        | 77                     |
| 6     | 5 equiv of cyclohexane                                                          | 82                     |
| 7     | 12 hours                                                                        | 63                     |
| 8     | with 1 equiv of K <sub>3</sub> PO <sub>4</sub>                                  | 52                     |
| 9     | 0 mol% FeCl <sub>3</sub>                                                        | 0                      |
| 10    | in the dark                                                                     | 0                      |
| 11    | 440 nm LED                                                                      | 0                      |
| 12    | Irradiated 1 h, then in the dark                                                | 0                      |

<sup>a</sup> **1a** (5 mmol), **2a** (0.5 mmol), FeCl<sub>3</sub> (10 mol %), CH<sub>3</sub>CN (2.0 mL), room temperature, 380 nm LEDs, 24 h. <sup>b</sup> Isolated yields.

### 3. General procedure and spectral data of the products

#### 3.1. General procedure for preparation of products

##### General Procedure A. Synthesis of phosphine oxide product 3

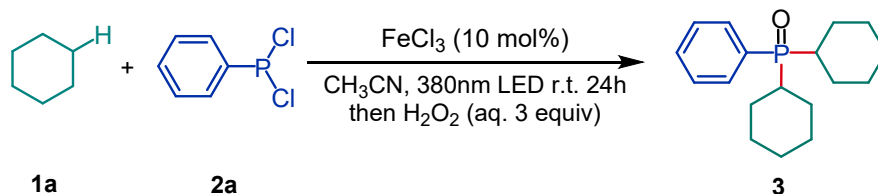

Phosphine oxide **3**, **5-15** and **23-29** were synthesized according to the **General Procedure A**.

Cyclohexane **1a** (0.5 mL, 5 mmol), dichlorophenylphosphine **2a** (89.5 mg, 0.5 mmol),  $\text{FeCl}_3$  (8.1 mg, 10 mol %) and solvent (2.0 mL) were added to a 25 mL flame-dried Young-type tube under  $\text{N}_2$  atmosphere. The reaction mixture was stirred at room temperature under 380 nm LED irradiation for 24 hours. After evaporation of the solvent under reduced pressure, the residue was dissolved in dichloromethane. The solution was quenched with  $\text{H}_2\text{O}_2$  (5 wt% aq., 1 mL) and extracted with dichloromethane (2 mL  $\times$  3), the combined organics were dried over sodium sulfate. The solvent was evaporated under reduced pressure to give the desired product **3** as white solid.

##### General Procedure B. Synthesis of phosphine Sulfide product 4

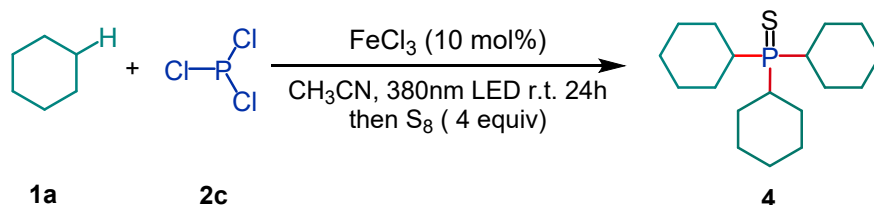

Phosphine sulfide **4**, **16-22** were synthesized according to the **General Procedure B**.

Cyclohexane **1a** (0.5 mL, 5 mmol), phosphorus trichloride **2c** (68.7 mg, 0.5 mmol),  $\text{FeCl}_3$  (8.1 mg, 10 mol %) and solvent (2.0 mL) were added to a 25 mL flame-dried Young-type tube under  $\text{N}_2$  atmosphere. The reaction mixture was stirred at room temperature under 380 nm LED irradiation for 24 hours. Then elemental sulfur (64 mg, 4 equiv.) was added under  $\text{N}_2$  atmosphere. The mixture was stirred at room temperature for 2 hours. The solvent was evaporated under reduced pressure to give the desired product **4** as white solid. After evaporation of the solvent under reduced pressure, the residue was purified by column chromatography (petroleum ether/ dichloromethane = 10/1 to 1/1) to afford tricyclohexylphosphine sulfide **4** as white solid.

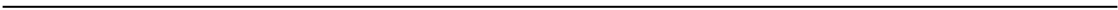

### 3.2. Products Characterization

#### Dicyclohexyl(phenyl)phosphine oxide (3)<sup>1</sup>

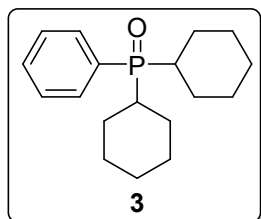

The title compound was prepared according to the **general procedure A** to give white solid, 120.7 mg, 83% yield. <sup>1</sup>H NMR (400 MHz, CDCl<sub>3</sub>) δ 7.69 – 7.52 (m, 2H), 7.49 – 7.35 (m, 3H), 2.11 – 1.88 (m, 4H), 1.81 – 1.48 (m, 8H), 1.32 – 0.78 (m, 10H); <sup>13</sup>C NMR (101 MHz, CDCl<sub>3</sub>) δ 131.4 (d, *J* = 7.7 Hz), 131.2 (d, *J* = 2.2 Hz), 129.7 (d, *J* = 85.4 Hz), 128.2 (d, *J* = 10.3 Hz), 35.0 (d, *J* = 67.2 Hz), 26.4 (d, *J* = 10.2 Hz), 26.2 (d, *J* = 9.7 Hz), 25.8, 25.4 (d, *J* = 2.2 Hz), 24.5 (d, *J* = 2.9 Hz); <sup>31</sup>P NMR (162 MHz, CDCl<sub>3</sub>) δ 45.57; HRMS (ESI) calcd for C<sub>18</sub>H<sub>28</sub>OP [M+H]<sup>+</sup>: 291.1872, found: 291.1876.

#### Tricyclohexylphosphine sulfide (4)<sup>2</sup>

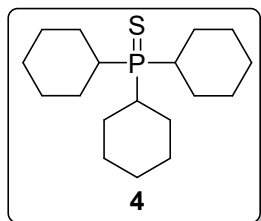

The title compound was prepared according to the **general procedure B** to give white solid, 68.6 mg, 44% yield. <sup>1</sup>H NMR (500 MHz, CDCl<sub>3</sub>) δ 2.06 – 1.96 (m, 6H), 1.95 – 1.82 (m, 9H), 1.77 – 1.70 (m, 3H), 1.53 – 1.37 (m, 6H), 1.34 – 1.19 (m, 9H); <sup>13</sup>C NMR (126 MHz, CDCl<sub>3</sub>) δ 37.0 (d, *J* = 44.4 Hz), 27.2 (d, *J* = 3.2 Hz), 27.0 (d, *J* = 12.3 Hz), 26.0 (d, *J* = 1.6 Hz); <sup>31</sup>P NMR (202 MHz, CDCl<sub>3</sub>) δ 62.03. HRMS (ESI) calcd for C<sub>18</sub>H<sub>34</sub>PS [M+H]<sup>+</sup>: 313.2113, found: 313.2115.

#### Dicyclopentyl(phenyl)phosphine oxide (5)<sup>3</sup>

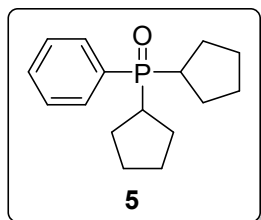

The title compound was prepared according to the **general procedure A** to give white solid, 112.7 mg, 86% yield. <sup>1</sup>H NMR (400 MHz, CDCl<sub>3</sub>) δ 7.71 – 7.54 (m, 2H), 7.48 – 7.31 (m, 3H), 2.46 – 2.15 (m, 2H), 2.07 – 1.71 (m, 5H), 1.71 – 1.24 (m, 11H); <sup>13</sup>C NMR (101 MHz, CDCl<sub>3</sub>) δ 131.8 (d, *J* = 41.5 Hz), 131.3, 131.1 (d, *J* = 7.8 Hz), 128.4 (d, *J* = 10.5 Hz), 37.5 (d, *J* = 71.6 Hz), 26.7 (d, *J* = 8.9 Hz), 26.6 (d, *J* = 96.6 Hz), 26.0 (d, *J* = 9.4 Hz); <sup>31</sup>P NMR (162 MHz, CDCl<sub>3</sub>) δ 47.27. HRMS (ESI) calcd for C<sub>16</sub>H<sub>24</sub>OP [M+H]<sup>+</sup>: 263.1559, found: 263.1557.

#### Dicycloheptyl(phenyl)phosphine oxide (6)

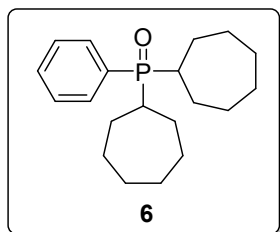

The title compound was prepared according to the **general procedure A** to give white solid, 144.7 mg, 91% yield.  $^1\text{H}$  NMR (400 MHz,  $\text{CDCl}_3$ )  $\delta$  7.70 – 7.53 (m, 2H), 7.48 – 7.33 (m, 3H), 2.54 – 1.80 (m, 6H), 1.80 – 1.10 (m, 20H);  $^{13}\text{C}$  NMR (101 MHz,  $\text{CDCl}_3$ )  $\delta$  131.4, 131.3, 130.4 (d,  $J = 86.7$  Hz), 128.3 (d,  $J = 10.0$  Hz), 35.8 (d,  $J = 63.8$  Hz), 28.2, 27.9 (d,  $J = 13.3$  Hz), 27.9 (d,  $J = 36.2$  Hz), 26.7 (d,  $J = 122.2$  Hz);  $^{31}\text{P}$  NMR (162 MHz,  $\text{CDCl}_3$ )  $\delta$  52.74; HRMS (ESI) calcd for  $\text{C}_{20}\text{H}_{32}\text{OP}$   $[\text{M}+\text{H}]^+$ : 319.2185, found: 319.2203.

#### Dicyclooctyl(phenyl)phosphine oxide (7)

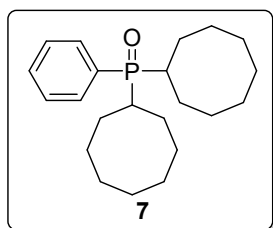

The title compound was prepared according to the **general procedure A** to give white solid, 145.3 mg, 84% yield.  $^1\text{H}$  NMR (400 MHz,  $\text{CDCl}_3$ )  $\delta$  7.78 – 7.53 (m, 2H), 7.49 – 7.27 (m, 3H), 2.31 – 1.79 (m, 5H), 1.78 – 0.99 (m, 25H);  $^{13}\text{C}$  NMR (101 MHz,  $\text{CDCl}_3$ )  $\delta$  131.5 (d,  $J = 7.5$  Hz), 131.2 (d,  $J = 2.8$  Hz), 129.6 (d,  $J = 173.4$  Hz), 128.3 (d,  $J = 10.2$  Hz), 33.5 (d,  $J = 63.9$  Hz), 27.0, 26.8 (d,  $J = 12.0$  Hz), 26.5, 26.0 (d,  $J = 23.2$  Hz), 25.9 (d,  $J = 52.2$  Hz), 25.7 (d,  $J = 1.9$  Hz);  $^{31}\text{P}$  NMR (162 MHz,  $\text{CDCl}_3$ )  $\delta$  54.51; HRMS (ESI) calcd for  $\text{C}_{22}\text{H}_{36}\text{OP}$   $[\text{M}+\text{H}]^+$ : 347.2498, found: 347.2495.

#### Dibenzyl(phenyl)phosphine oxide (8)<sup>4</sup>

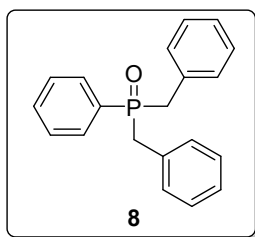

The title compound was prepared according to the **general procedure A** to give white solid, 125 mg, 82% yield.  $^1\text{H}$  NMR (500 MHz,  $\text{CDCl}_3$ )  $\delta$  7.55 – 7.48 (m, 2H), 7.46 – 7.42 (m, 1H), 7.38 – 7.32 (m, 2H), 7.24 – 7.14 (m, 6H), 7.14 – 7.07 (m, 4H), 3.33 (d,  $J = 13.7$  Hz, 4H);  $^{13}\text{C}$  NMR (126 MHz,  $\text{CDCl}_3$ )  $\delta$  131.7 (d,  $J = 2.8$  Hz), 131.4 (d,  $J = 7.5$  Hz), 131.0 (d,  $J = 8.4$  Hz), 130.8 (d,  $J = 94.8$  Hz), 130.0, 128.5 (d,  $J = 2.7$  Hz), 128.2 (d,  $J = 11.5$  Hz), 126.8 (d,  $J = 2.9$  Hz), 37.3 (d,  $J = 63.3$  Hz);  $^{31}\text{P}$  NMR (202 MHz,  $\text{CDCl}_3$ )  $\delta$  35.14; HRMS (ESI) calcd for  $\text{C}_{20}\text{H}_{20}\text{OP}$   $[\text{M}+\text{H}]^+$ : 307.1246, found: 307.1243.

#### bis(2-Methylbenzyl)(phenyl)phosphine oxide (9)

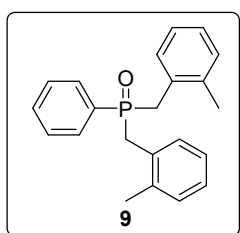

The title compound was prepared according to the **general procedure A** to give white solid, 86.4 mg, 52% yield.  $^1\text{H}$  NMR (400 MHz,  $\text{CDCl}_3$ )  $\delta$  7.59 – 7.52 (m, 2H), 7.47 – 7.41 (m, 6H), 7.15 – 7.11 (m, 3H), 7.01 – 6.95 (m, 2H), 3.52 (t,  $J = 16.1$  Hz,

2H), 3.38 (td,  $J = 15.3, 4.3$  Hz, 2H), 2.10 (s, 6H);  $^{13}\text{C}$  NMR (101 MHz,  $\text{CDCl}_3$ )  $\delta$  136.9 (d,  $J = 5.5$  Hz), 132.7 (d,  $J = 2.6$  Hz), 30.7 (d,  $J = 2.9$  Hz), 130.5 (d,  $J = 5.3$  Hz), 130.1, 130.0, 128.9 (d,  $J = 7.2$  Hz), 128.7 (d,  $J = 12.5$  Hz), 127.5 (d,  $J = 3.6$  Hz), 126.3 (d,  $J = 3.1$  Hz), 36.1 (d,  $J = 61.5$  Hz), 19.8;  $^{31}\text{P}$  NMR (162 MHz,  $\text{CDCl}_3$ )  $\delta$  28.89; HRMS (ESI) calcd for  $\text{C}_{22}\text{H}_{24}\text{OP}$   $[\text{M}+\text{H}]^+$ : 335.1559, found: 335.1573.

#### bis(3,5-Dimethylbenzyl)(phenyl)phosphine oxide (10)

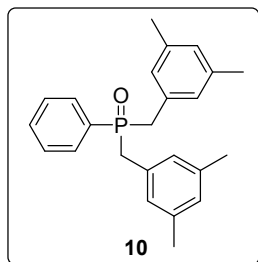

The title compound was prepared according to the **general procedure A** to give white solid, 124.9 mg, 69% yield.  $^1\text{H}$  NMR (500 MHz,  $\text{CDCl}_3$ )  $\delta$  7.50 – 7.39 (m, 2H), 7.38 – 7.32 (m, 1H), 7.30 – 7.21 (m, 2H), 6.70 (s, 2H), 6.60 (s, 4H), 3.14 (d,  $J = 14.0$  Hz, 4H), 2.09 (s, 12H);  $^{13}\text{C}$  NMR (126 MHz,  $\text{CDCl}_3$ )  $\delta$  137.9 (d,  $J = 2.5$  Hz), 131.7 (d,  $J = 2.6$  Hz), 131.3 (d,  $J = 8.8$  Hz), 131.2, 131.0, 128.5 (d,  $J = 2.9$  Hz), 128.1 (d,  $J = 11.3$  Hz), 127.9 (d,  $J = 5.1$  Hz), 37.1 (d,  $J = 63.4$  Hz), 21.2;  $^{31}\text{P}$  NMR (202 MHz,  $\text{CDCl}_3$ )  $\delta$  35.56; HRMS (ESI) calcd for  $\text{C}_{24}\text{H}_{28}\text{OP}$   $[\text{M}+\text{H}]^+$ : 363.1872, found: 363.1883.

#### bis(2-Chlorobenzyl)(phenyl)phosphine oxide (11)

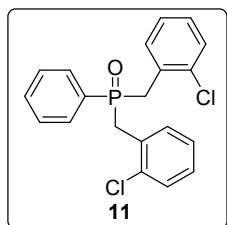

The title compound was prepared according to the **general procedure A** to give white solid, 75.3 mg, 40% yield.  $^1\text{H}$  NMR (500 MHz,  $\text{CDCl}_3$ )  $\delta$  7.59 – 7.56 (m, 2H), 7.55 – 7.53 (m, 2H), 7.48 – 7.43 (m, 3H), 7.38 – 7.32 (m, 2H), 7.22 – 7.18 (m, 2H), 7.16 – 7.12 (m, 2H), 3.75 – 3.45 (m, 4H);  $^{13}\text{C}$  NMR (126 MHz,  $\text{CDCl}_3$ )  $\delta$  134.1 (d,  $J = 6.3$  Hz), 132.8 (d,  $J = 2.7$  Hz), 132.0 (d,  $J = 5.3$  Hz), 130.0 (d,  $J = 10.9$  Hz), 129.8 (d,  $J = 3.0$  Hz), 128.9 (d,  $J = 3.4$  Hz), 128.8 (d,  $J = 12.6$  Hz), 127.2 (d,  $J = 3.0$  Hz), 36.6 (d,  $J = 62.1$  Hz);  $^{31}\text{P}$  NMR (202 MHz,  $\text{CDCl}_3$ )  $\delta$  25.56; HRMS (ESI) calcd for  $\text{C}_{20}\text{H}_{18}\text{Cl}_2\text{OP}$   $[\text{M}+\text{H}]^+$ : 375.0467, found: 375.0478.

#### bis(4-Fluorobenzyl)(phenyl)phosphine oxide (12)

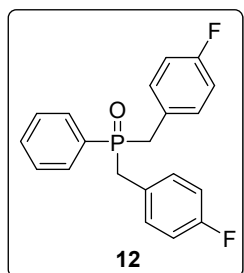

The title compound was prepared according to the **general procedure A** to give white solid, 101.1 mg, 59% yield.  $^1\text{H}$  NMR (400 MHz,  $\text{CDCl}_3$ )  $\delta$  7.46 – 7.38 (m, 3H), 7.36 – 7.28 (m, 2H),



7.04 – 6.94 (m, 4H), 6.87 – 6.76 (m, 4H), 3.22 (dd,  $J = 13.3, 5.1$  Hz, 4H);  $^{13}\text{C}$  NMR (101 MHz,  $\text{CDCl}_3$ )  $\delta$  163.1 (d,  $J = 3.3$  Hz), 160.7 (d,  $J = 3.2$  Hz), 132.0 (d,  $J = 2.8$  Hz), 131.4 (dd,  $J = 8.1, 5.1$  Hz), 130.9 (d,  $J = 8.8$  Hz), 128.5 (d,  $J = 11.5$  Hz), 126.9 (dd,  $J = 7.8, 3.3$  Hz), 115.5 (dd,  $J = 21.4, 2.5$  Hz), 36.5 (d,  $J = 63.8$  Hz);  $^{31}\text{P}$  NMR (162 MHz,  $\text{CDCl}_3$ )  $\delta$  34.87;  $^{19}\text{F}$  NMR (376 MHz,  $\text{CDCl}_3$ )  $\delta$  -115.6 (d,  $J = 4.8$  Hz); HRMS (ESI) calcd for  $\text{C}_{20}\text{H}_{18}\text{F}_2\text{OP}$   $[\text{M}+\text{H}]^+$ : 343.1058, found: 343.1062

### bis(2-Methyl-2-phenylpropyl)(phenyl)phosphine oxide (13)

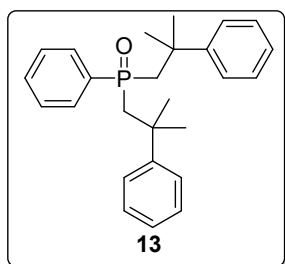

The title compound was prepared according to the **general procedure A** to give white solid, 104.6 mg, 54% yield.  $^1\text{H}$  NMR (500 MHz,  $\text{CDCl}_3$ )  $\delta$  7.55 – 7.49 (m, 5H), 7.43 – 7.40 (m, 5H), 7.35 – 7.31 (m, 3H), 7.24 – 7.20 (m, 2H), 2.40 (ddd,  $J = 17.3, 15.2, 6.8$  Hz, 2H), 2.23 (dd,  $J = 15.2, 6.6$  Hz, 2H), 1.72 (s, 6H), 1.51 (s, 6H);  $^{13}\text{C}$  NMR (126 MHz,  $\text{CDCl}_3$ )  $\delta$  147.2 (d,  $J = 6.4$  Hz), 132.2 (d,  $J = 2.8$  Hz), 131.8 (d,  $J = 97.0$  Hz), 129.7 (d,  $J = 10.9$  Hz), 128.8 (d,  $J = 12.4$  Hz), 128.6, 126.6, 125.7, 46.3 (d,  $J = 67.5$  Hz), 37.4 (d,  $J = 3.8$  Hz), 32.0 (d,  $J = 9.4$  Hz), 28.5 (d,  $J = 5.0$  Hz);  $^{31}\text{P}$  NMR (162 MHz,  $\text{CDCl}_3$ )  $\delta$  22.69; HRMS (ESI) calcd for  $\text{C}_{26}\text{H}_{32}\text{OP}$   $[\text{M}+\text{H}]^+$ : 391.2185, found: 391.2188.

### Hexanyldiphenylphosphine oxide (14)

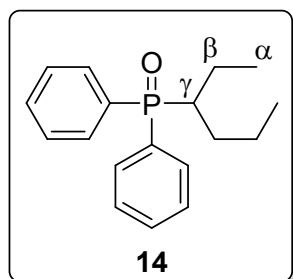

The title compound was prepared according to the **general procedure A** to give white solid, 132.7 mg, 93% yield.  $^1\text{H}$  NMR (400 MHz,  $\text{CDCl}_3$ )  $\delta$  7.81 – 7.54 (m, 4H), 7.50 – 7.10 (m, 6H), 2.47 – 0.34 (m, 13H);  $^{13}\text{C}$  NMR (101 MHz,  $\text{CDCl}_3$ )  $\delta$  133.2 (d,  $J = 15.6$  Hz), 132.4 (d,  $J = 9.9$  Hz), 132.2 (d,  $J = 11.7$  Hz), 131.7, 131.5, 131.0 (d,  $J = 9.0$  Hz), 130.9 – 130.6 (m), 128.6 (d,  $J = 6.6$  Hz), 128.5 (d,  $J = 5.7$  Hz), 128.0 (d,  $J = 12.5$  Hz), 38.2 (d,  $J = 71.0$  Hz), 31.8 (d,  $J = 72.1$  Hz), 31.2, 30.6 (d,  $J = 14.7$  Hz), 29.8 (d,  $J = 30.9$  Hz), 29.4 (d,  $J = 28.2$  Hz), 28.6 (d,  $J = 64.0$  Hz), 22.3 (d,  $J = 3.7$  Hz), 21.3, 21.1 (d,  $J = 9.8$  Hz), 20.5, 14.1, 13.9 (d,  $J = 11.9$  Hz), 12.5 (d,  $J = 9.3$  Hz), 11.9;  $^{31}\text{P}$  NMR (162 MHz,  $\text{CDCl}_3$ )  $\delta$  38.16, 37.55, 33.53; HRMS (ESI) calcd for  $\text{C}_{18}\text{H}_{24}\text{OP}$   $[\text{M}+\text{H}]^+$ : 287.1559, found: 287.1563.

### Diphenyl(phenylethyl)phosphine oxide (15)<sup>5</sup>

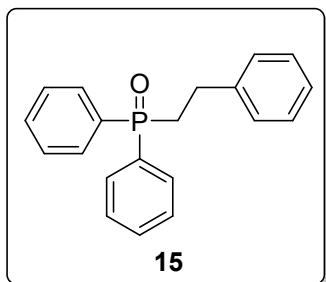

The title compound was prepared according to the **general procedure A** to give white solid, 99.1 mg, 65% yield.  $^1\text{H}$  NMR (400 MHz,  $\text{CDCl}_3$ )  $\delta$  7.83 – 7.70 (m, 4H), 7.60 – 7.44 (m, 6H), 7.31 – 7.22 (m, 2H), 7.23 – 7.10 (m, 3H), 3.02 – 2.84 (m, 2H), 2.65 – 2.48 (m, 2H);  $^{13}\text{C}$  NMR (101 MHz,  $\text{CDCl}_3$ )  $\delta$  141.2 (d,  $J = 15.6$  Hz), 132.6 (d,  $J = 98.8$  Hz), 131.9 (d,  $J = 2.6$  Hz), 130.8 (d,  $J = 9.3$  Hz), 128.8 (d,  $J = 11.6$  Hz), 128.6, 128.1, 126.4, 31.9 (d,  $J = 70.0$  Hz), 27.5 (d,  $J = 2.8$  Hz);  $^{31}\text{P}$  NMR (162 MHz,  $\text{CDCl}_3$ )  $\delta$  31.89; HRMS (ESI) calcd for  $\text{C}_{20}\text{H}_{20}\text{OP}$   $[\text{M}+\text{H}]^+$ : 307.1246, found: 307.1257.

### (Naphthalen-2-ylmethyl)diphenylphosphine sulfide (16)

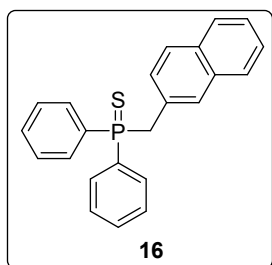

The title compound was prepared according to the **general procedure B** to give white solid, 53 mg, 30% yield.  $^1\text{H}$  NMR (500 MHz,  $\text{CDCl}_3$ )  $\delta$  7.82 – 7.75 (m, 4H), 7.74 – 7.70 (m, 1H), 7.63 – 7.58 (m, 2H), 7.49 – 7.44 (m, 2H), 7.44 – 7.34 (m, 7H), 7.13 – 7.06 (m, 1H), 3.95 (d,  $J = 13.4$  Hz, 2H);  $^{13}\text{C}$  NMR (126 MHz,  $\text{CDCl}_3$ )  $\delta$  133.1 (d,  $J = 3.3$  Hz), 132.4 (d,  $J = 2.7$  Hz), 132.2 (d,  $J = 80.0$  Hz), 131.7, 131.7, 131.7, 129.6 (d,  $J = 6.9$  Hz), 128.6 (d,  $J = 12.1$  Hz), 128.4 (d,  $J = 8.0$  Hz), 127.8 (d,  $J = 1.7$  Hz), 127.7 (d,  $J = 1.8$  Hz), 127.5 (d,  $J = 2.7$  Hz), 126.0, 125.8 (d,  $J = 1.8$  Hz), 41.2 (d,  $J = 50.4$  Hz);  $^{31}\text{P}$  NMR (202 MHz,  $\text{CDCl}_3$ )  $\delta$  42.07; HRMS (ESI) calcd for  $\text{C}_{23}\text{H}_{20}\text{PS}$   $[\text{M}+\text{H}]^+$ : 359.1018, found: 359.1023.

### ((5-Methylthiophen-2-yl)methyl)diphenylphosphine sulfide (17)

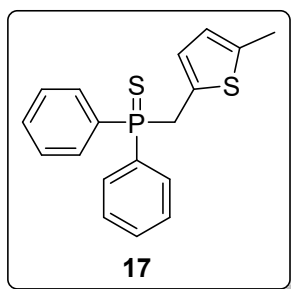

The title compound was prepared according to the **general procedure B** to give white solid, 70.5 mg, 43% yield.  $^1\text{H}$  NMR (400 MHz,  $\text{CDCl}_3$ )  $\delta$  7.79 – 7.70 (m, 4H), 7.44 – 7.33 (m, 6H), 6.45 – 6.36 (m, 2H), 3.91 (d,  $J = 12.5$  Hz, 2H), 2.25 (dd,  $J = 2.6, 1.0$  Hz, 3H);  $^{13}\text{C}$  NMR (101 MHz,  $\text{CDCl}_3$ )  $\delta$  139.8 (d,  $J = 4.0$  Hz), 131.9 (d,  $J = 80.2$  Hz), 131.7 (d,  $J = 3.0$  Hz), 131.6 (d,  $J = 9.9$  Hz), 129.2 (d,  $J = 8.6$  Hz), 128.6 (d,  $J = 12.1$  Hz), 128.2 (d,  $J = 7.6$  Hz), 124.9 (d,  $J = 3.3$  Hz), 36.4 (d,  $J = 53.7$  Hz), 15.4 (d,  $J = 1.4$  Hz);  $^{31}\text{P}$  NMR (162 MHz,  $\text{CDCl}_3$ )  $\delta$  41.06; HRMS (ESI) calcd for  $\text{C}_{18}\text{H}_{18}\text{PS}_2$   $[\text{M}+\text{H}]^+$ : 329.0582, found: 329.0588.

### (1,4-Dioxan-2-yl)diphenylphosphine sulfide (18)

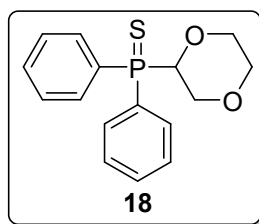

The title compound was prepared according to the **general procedure B** to give white solid, 108.4mg, 71% yield.  $^1\text{H}$  NMR (400 MHz,  $\text{CDCl}_3$ )  $\delta$  7.98 – 7.88 (m, 2H), 7.85 – 7.72 (m, 2H), 7.48 – 7.29 (m, 6H), 4.53 (ddd,  $J = 10.8, 4.9, 2.7$  Hz, 1H), 4.12 (dd,  $J = 11.7, 2.7$  Hz, 1H), 3.75 (dd,  $J = 11.9, 2.8$  Hz, 1H), 3.67 (td,  $J = 11.5, 2.7$  Hz, 1H), 3.59 (dt,  $J = 11.8, 2.7$  Hz, 1H), 3.52 – 3.39 (m, 2H);  $^{13}\text{C}$  NMR (101 MHz,  $\text{CDCl}_3$ )  $\delta$  132.8 (d,  $J = 10.2$  Hz), 132.0 (d,  $J = 3.0$  Hz), 131.8 (d,  $J = 3.1$  Hz), 131.5 (d,  $J = 10.1$  Hz), 130.7, 129.1, 128.6 (d,  $J = 12.2$  Hz), 128.3 (d,  $J = 12.4$  Hz), 76.6 (d,  $J = 70.5$  Hz), 68.1 (d,  $J = 8.1$  Hz), 66.2, 66.0 (d,  $J = 8.9$  Hz);  $^{31}\text{P}$  NMR (162 MHz,  $\text{CDCl}_3$ )  $\delta$  37.09; HRMS (ESI) calcd for  $\text{C}_{16}\text{H}_{18}\text{O}_2\text{PS}$   $[\text{M}+\text{H}]^+$ : 305.0760, found: 305.0764.

### Diphenyl(tetrahydrofuran-2-yl)phosphine sulfide (19)

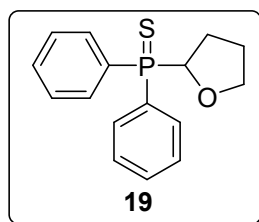

The title compound was prepared according to the **general procedure B** to give white solid, 60.5 mg, 42% yield.  $^1\text{H}$  NMR (400 MHz,  $\text{CDCl}_3$ )  $\delta$  8.03 – 7.91 (m, 4H), 7.52 – 7.41 (m, 6H), 5.00 – 4.88 (m, 1H), 3.99 – 3.83 (m, 1H), 3.75 – 3.57 (m, 1H), 2.35 – 2.11 (m, 2H), 1.88 – 1.72 (m, 1H), 1.72 – 1.55 (m, 1H);  $^{13}\text{C}$  NMR (101 MHz,  $\text{CDCl}_3$ )  $\delta$  132.7 (d,  $J = 9.5$  Hz), 132.2 (d,  $J = 79.2$  Hz), 131.6 (d,  $J = 2.9$  Hz), 131.5 (d,  $J = 9.6$  Hz), 131.4 (d,  $J = 2.9$  Hz), 129.3 (d,  $J = 77.3$  Hz), 128.5, 128.1 (d,  $J = 11.8$  Hz), 79.2 (d,  $J = 70.3$  Hz), 71.0 (d,  $J = 4.3$  Hz), 27.5 (d,  $J = 2.4$  Hz), 25.8 (d,  $J = 4.8$  Hz);  $^{31}\text{P}$  NMR (162 MHz,  $\text{CDCl}_3$ )  $\delta$  44.33 HRMS (ESI) calcd for  $\text{C}_{16}\text{H}_{18}\text{OPS}$   $[\text{M}+\text{H}]^+$ : 289.0810, found: 289.0817.

### (*tert*-Butoxymethyl)diphenylphosphine sulfide (20)

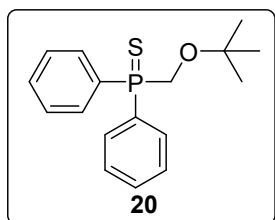

The title compound was prepared according to the **general procedure B** to give white solid, 52.9 mg, 35% yield.  $^1\text{H}$  NMR (400 MHz,  $\text{CDCl}_3$ )  $\delta$  7.89 – 7.82 (m, 4H), 7.43 – 7.39 (m, 2H), 7.38 – 7.33 (m, 4H), 4.13 (d,  $J = 6.9$  Hz, 2H), 0.99 (s, 9H);  $^{13}\text{C}$  NMR (101 MHz,  $\text{CDCl}_3$ )  $\delta$  132.2 (d,  $J = 10.1$  Hz), 131.7 (d,  $J = 3.0$  Hz), 131.2 (d,  $J = 81.4$  Hz), 128.2 (d,  $J = 12.2$  Hz), 75.9 (d,  $J = 9.7$  Hz), 65.7 (d,  $J = 73.0$  Hz), 26.9;  $^{31}\text{P}$  NMR (162 MHz,  $\text{CDCl}_3$ )  $\delta$  38.68; HRMS (ESI) calcd for  $\text{C}_{17}\text{H}_{22}\text{OPS}$   $[\text{M}+\text{H}]^+$ : 305.1123, found: 305.1126.

### (Phenoxymethyl)diphenylphosphine sulfide (21)

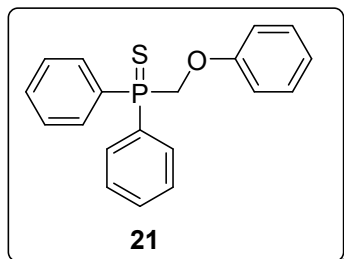

The title compound was prepared according to the **general procedure B** to give white solid, 69.7 mg, 43% yield.  $^1\text{H}$  NMR (400 MHz,  $\text{CDCl}_3$ )  $\delta$  7.99 – 7.90 (m, 4H), 7.55 – 7.48 (m, 2H), 7.48 – 7.41 (m, 4H), 7.29 – 7.20 (m, 2H), 7.00 – 6.94 (m, 1H), 6.90 – 6.85 (m, 2H), 4.79 (d,  $J = 6.2$  Hz, 2H);  $^{13}\text{C}$  NMR (101 MHz,  $\text{CDCl}_3$ )  $\delta$  158.3 (d,  $J = 11.0$  Hz), 132.1 (d,  $J = 3.2$  Hz), 132.1 (d,  $J = 10.3$  Hz), 130.5 (d,  $J = 82.6$  Hz), 129.7, 128.6 (d,  $J = 12.5$  Hz), 122.1, 114.7, 70.0 (d,  $J = 70.3$  Hz);  $^{31}\text{P}$  NMR (162 MHz,  $\text{CDCl}_3$ )  $\delta$  37.13 HRMS (ESI) calcd for  $\text{C}_{19}\text{H}_{17}\text{OPSNa}$   $[\text{M}+\text{Na}]^+$ : 347.0630, found: 347.0625.

### N-((Diphenylphosphorothioyl)methyl)-N-methylacetamide (22)

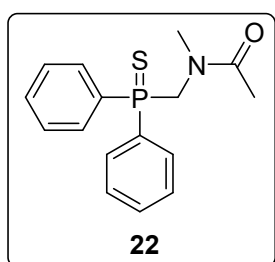

The title compound was prepared according to the **general procedure B** to give white solid, 60.4 mg, 40% yield.  $^1\text{H}$  NMR (400 MHz,  $\text{CDCl}_3$ )  $\delta$  7.98 – 7.79 (m, 4H), 7.47 – 7.28 (m, 6H), 4.56 (d,  $J = 3.7$  Hz, 2H), 3.08 (s, 3H), 1.86 (s, 3H);  $^{13}\text{C}$  NMR (101 MHz,  $\text{CDCl}_3$ )  $\delta$  171.1, 131.9 (d,  $J = 3.0$  Hz), 131.7 (d,  $J = 10.4$  Hz), 131.0 (d,  $J = 78.2$  Hz), 128.6 (d,  $J = 12.2$  Hz), 51.5 (d,  $J = 60.9$  Hz), 38.3, 21.3;  $^{31}\text{P}$  NMR (162 MHz,  $\text{CDCl}_3$ )  $\delta$  39.99; HRMS (ESI) calcd for  $\text{C}_{16}\text{H}_{19}\text{NOPS}$   $[\text{M}+\text{H}]^+$ : 304.0919, found: 304.0929.

### 1-(Diphenylphosphoryl)-2,4-dimethylpentan-3-one (23)<sup>6</sup>

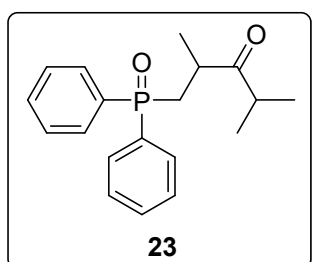

The title compound was prepared according to the **general procedure A** to give white solid, 94.2 mg, 60% yield.  $^1\text{H}$  NMR (500 MHz,  $\text{CDCl}_3$ )  $\delta$  7.83 – 7.70 (m, 4H), 7.54 – 7.41 (m, 6H), 3.34 – 3.20 (m, 1H), 2.93 (ddd,  $J = 15.4, 9.2, 6.2$  Hz, 1H), 2.66 (dq,  $J = 13.8, 6.9$  Hz, 1H), 2.21 (ddd,  $J = 15.4, 12.3, 6.1$  Hz, 1H), 1.19 (d,  $J = 7.2$  Hz, 3H), 1.01 (d,  $J = 6.8$  Hz, 3H), 0.80 (d,  $J = 6.9$  Hz, 3H);  $^{13}\text{C}$  NMR (126 MHz,  $\text{CDCl}_3$ )  $\delta$  216.1 (d,  $J = 6.9$  Hz), 133.7 (d,  $J = 98.8$  Hz), 132.3 (d,  $J = 98.3$  Hz), 131.8 (d,  $J = 2.8$  Hz), 131.8 (d,  $J = 2.7$  Hz), 131.0 (d,  $J = 9.3$  Hz), 130.5 (d,  $J = 9.3$  Hz), 128.6, 128.6 (d,  $J = 24.0$  Hz), 39.3, 37.9 (d,  $J = 2.6$  Hz), 31.9 (d,  $J = 71.9$  Hz), 19.5 (d,  $J = 7.7$  Hz), 18.2 (d,

$J = 32.6$  Hz);  $^{31}\text{P}$  NMR (202 MHz,  $\text{CDCl}_3$ )  $\delta$  30.79; HRMS (ESI) calcd for  $\text{C}_{19}\text{H}_{24}\text{O}_2\text{P}$   $[\text{M}+\text{H}]^+$ : 315.1508, found: 315.1505.

#### 4-(Diphenylphosphoryl)-3-methylbutan-2-one (24)<sup>6</sup>

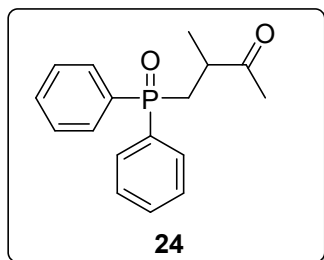

The title compound was prepared according to the **general procedure A** to give white solid, 72.4 mg, 51% yield.  $^1\text{H}$  NMR (500 MHz,  $\text{CDCl}_3$ )  $\delta$  7.80 – 7.69 (m, 4H), 7.54 – 7.44 (m, 6H), 3.11 – 3.01 (m, 1H), 2.96 (ddd,  $J = 15.5, 9.8, 5.8$  Hz, 1H), 2.18 (ddd,  $J = 15.3, 11.7, 6.6$  Hz, 1H), 2.05 (s, 3H), 1.22 (d,  $J = 7.2$  Hz, 3H);  $^{13}\text{C}$  NMR (126 MHz,  $\text{CDCl}_3$ )  $\delta$  210.3 (d,  $J = 8.2$  Hz), 133.4 (d,  $J = 98.9$  Hz), 132.5 (d,  $J = 98.8$  Hz), 131.8, 131.8 (d,  $J = 4.8$  Hz), 130.9 (d,  $J = 9.3$  Hz), 130.6 (d,  $J = 9.2$  Hz), 128.7 (d,  $J = 8.3$  Hz), 128.6 (d,  $J = 8.1$  Hz), 40.6 (d,  $J = 2.4$  Hz), 31.5 (d,  $J = 72.0$  Hz), 28.1, 18.8 (d,  $J = 6.9$  Hz);  $^{31}\text{P}$  NMR (202 MHz,  $\text{CDCl}_3$ )  $\delta$  31.03; HRMS (ESI) calcd for  $\text{C}_{17}\text{H}_{20}\text{OPS}$   $[\text{M}+\text{H}]^+$ : 287.1195, found: 287.1192.

#### 3-(Diphenylphosphoryl)cyclopentan-1-one (25)<sup>7</sup>

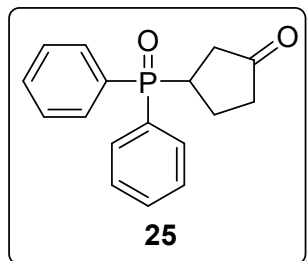

The title compound was prepared according to the **general procedure A** to give white solid, 80.9 mg, 57% yield.  $^1\text{H}$  NMR (400 MHz,  $\text{CDCl}_3$ )  $\delta$  7.81 – 7.68 (m, 4H), 7.54 – 7.41 (m, 6H), 3.10 – 2.98 (m, 1H), 2.62 – 2.49 (m, 1H), 2.44 – 2.34 (m, 1H), 2.32 – 2.12 (m, 3H), 2.07 – 1.97 (m, 1H);  $^{13}\text{C}$  NMR (101 MHz,  $\text{CDCl}_3$ )  $\delta$  216.1 (d,  $J = 12.6$  Hz), 132.1 (d,  $J = 2.9$  Hz), 130.9 (d,  $J = 9.1$  Hz), 130.7 (d,  $J = 9.0$  Hz), 128.9 (d,  $J = 11.6$  Hz), 38.0 (d,  $J = 6.3$  Hz), 37.9 (d,  $J = 2.2$  Hz), 35.2 (d,  $J = 77.3$  Hz), 22.5 (d,  $J = 2.4$  Hz);  $^{31}\text{P}$  NMR (162 MHz,  $\text{CDCl}_3$ )  $\delta$  32.21; HRMS (ESI) calcd for  $\text{C}_{17}\text{H}_{18}\text{O}_2\text{P}$   $[\text{M}+\text{H}]^+$ : 285.1039, found: 285.1030.

#### 3-(Diphenylphosphoryl)-2,2-dimethylpropanenitrile (26)

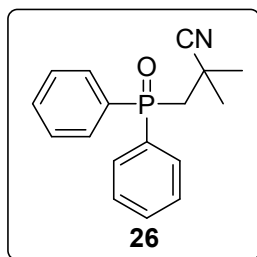

The title compound was prepared according to the **general procedure A** to give white solid, 107.0 mg, 76% yield.  $^1\text{H}$  NMR (400 MHz,  $\text{CDCl}_3$ )  $\delta$  7.76 – 7.65 (m, 4H), 7.44 – 7.35 (m, 6H), 2.56 (d,  $J = 10.6$  Hz, 2H), 1.44 (s, 6H);  $^{13}\text{C}$  NMR (101 MHz,

CDCl<sub>3</sub>)  $\delta$  132.8 (d,  $J = 100.4$  Hz), 132.2 (d,  $J = 2.9$  Hz), 130.7 (d,  $J = 9.5$  Hz), 128.8 (d,  $J = 11.8$  Hz), 123.9 (d,  $J = 9.0$  Hz), 39.2 (d,  $J = 69.1$  Hz), 30.5 (d,  $J = 4.0$  Hz), 28.4 (d,  $J = 5.5$  Hz); <sup>31</sup>P NMR (162 MHz, CDCl<sub>3</sub>)  $\delta$  26.21. HRMS (ESI) calcd for C<sub>17</sub>H<sub>19</sub>NOP [M+H]<sup>+</sup>: 284.1199, found: 284.1189.

#### 4-(Diphenylphosphoryl)butanenitrile (27)

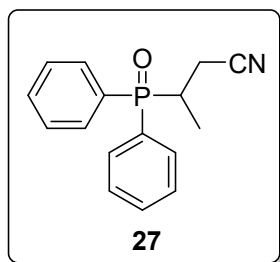

The title compound was prepared according to the **general procedure A** to give white solid, 71.3 mg, 53% yield. <sup>1</sup>H NMR (500 MHz, CDCl<sub>3</sub>)  $\delta$  7.91 – 7.75 (m, 4H), 7.59 – 7.49 (m, 6H), 2.83 – 2.72 (m, 1H), 2.66 – 2.51 (m, 2H), 1.36 (dd,  $J = 15.5, 7.1$  Hz, 3H); <sup>13</sup>C NMR (126 MHz, CDCl<sub>3</sub>)  $\delta$  132.6 (d,  $J = 2.8$  Hz), 132.5 (d,  $J = 2.6$  Hz), 132.4 (d,  $J = 2.8$  Hz), 131.0 (d,  $J = 8.8$  Hz), 130.8 (d,  $J = 8.9$  Hz), 130.7 (d,  $J = 11.4$  Hz), 129.2 (d,  $J = 11.5$  Hz), 129.0 (d,  $J = 11.6$  Hz), 118.0 (d,  $J = 19.2$  Hz), 30.2 (d,  $J = 71.1$  Hz), 18.6 (d,  $J = 1.7$  Hz), 12.7 (d,  $J = 2.4$  Hz); <sup>31</sup>P NMR (202 MHz, CDCl<sub>3</sub>)  $\delta$  33.76. HRMS (ESI) calcd for C<sub>16</sub>H<sub>17</sub>NOP [M+H]<sup>+</sup>: 270.1042, found: 270.1049.

#### Methyl 3-(diphenylphosphoryl)-2-methylpropanoate (28)<sup>8</sup>

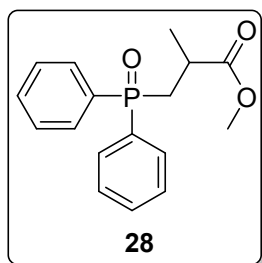

The title compound was prepared according to the **general procedure A** to give white solid, 96.6 mg, 64% yield. <sup>1</sup>H NMR (500 MHz, CDCl<sub>3</sub>)  $\delta$  7.71 – 7.65 (m, 4H), 7.45 – 7.38 (m, 6H), 3.41 (s, 3H), 2.94 – 2.75 (m, 2H), 2.29 – 2.19 (m, 1H), 1.21 (d,  $J = 6.9$  Hz, 3H); <sup>13</sup>C NMR (126 MHz, CDCl<sub>3</sub>)  $\delta$  175.9 (d,  $J = 9.8$  Hz), 131.9 (d,  $J = 2.4$  Hz), 131.4 (d,  $J = 9.6$  Hz), 131.0 (d,  $J = 9.4$  Hz), 130.7 (d,  $J = 11.5$  Hz), 130.6 (d,  $J = 9.5$  Hz), 129.0 (d,  $J = 12.9$  Hz), 128.8 (d,  $J = 9.9$  Hz), 128.7 (d,  $J = 11.3$  Hz), 52.0, 33.7 (d,  $J = 2.7$  Hz), 33.0 (d,  $J = 71.8$  Hz), 19.2 (d,  $J = 7.4$  Hz); <sup>31</sup>P NMR (202 MHz, CDCl<sub>3</sub>)  $\delta$  30.90; HRMS (ESI) calcd for C<sub>17</sub>H<sub>20</sub>O<sub>3</sub>P [M+H]<sup>+</sup>: 303.1145, found: 303.1157.

#### Methyl 3-(diphenylphosphoryl)propanoate (29)<sup>6</sup>

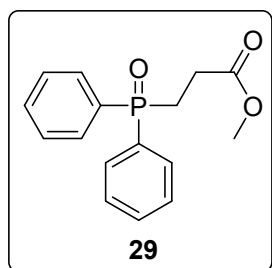

The title compound was prepared according to the **general procedure A** to give white solid, 80.6 mg, 56% yield, 2:1 r.r. <sup>1</sup>H NMR (400 MHz, CDCl<sub>3</sub>)  $\delta$  7.72 – 7.62 (m, 4H), 7.48 – 7.34

---

(m, 6H), 4.79 (d,  $J = 5.1$  Hz, 0.67H), 3.51 (s, 2H), 2.68 – 2.40 (m, 2.67H), 2.22 – 2.12 (m, 0.67H), 0.90 (t,  $J = 7.6$  Hz, 1H);  $^{13}\text{C}$  NMR (101 MHz,  $\text{CDCl}_3$ )  $\delta$  172.8, 172.6 (d,  $J = 3.0$  Hz), 132.7 (d,  $J = 2.9$  Hz), 132.2 (d,  $J = 2.8$  Hz), 132.1 (d,  $J = 2.7$  Hz), 131.4 (d,  $J = 9.2$  Hz), 131.4 (d,  $J = 9.7$  Hz), 130.8 (d,  $J = 9.5$  Hz), 128.9 (d,  $J = 4.1$  Hz), 128.8 (d,  $J = 4.1$  Hz), 61.0 (d,  $J = 44.3$  Hz), 60.2 (d,  $J = 48.4$  Hz), 52.1, 27.5, 26.8 (d,  $J = 77.0$  Hz), 26.1, 24.8 (d,  $J = 73.4$  Hz), 24.8 (d,  $J = 73.5$  Hz), 9.2, 8.9;  $^{31}\text{P}$  NMR (162 MHz,  $\text{CDCl}_3$ )  $\delta$  31.80, 27.42; HRMS (ESI) calcd for  $\text{C}_{16}\text{H}_{18}\text{O}_3\text{P}$   $[\text{M}+\text{H}]^+$ : 289.0988, found: 289.0991.

## 4. Mechanistic Studies

### 4.1. Cyclic voltammetry experiments

#### 4.1.1. Methods

Cyclic voltammograms were conducted on a CHI660D electrochemical workstation using a 3-electrode cell configuration. Samples were prepared with 5-10 mM substrate in 15 mL of 0.1 M tetra-*n*-butylammonium hexafluorophosphate in CH<sub>3</sub>CN. Measurements employed a glassy carbon working electrode, platinum wire counter electrode, Ag|Ag<sub>2</sub>O (0.1 M tetra-*n*-butylammonium hexafluorophosphate in CH<sub>3</sub>CN as electrolyte solution) reference electrode, and a scan rate of 50 mV/s. The glassy carbon electrode was polished between each scan. Ferrocene ( $E_{1/2} = +0.46$  V vs SCE)<sup>[25]</sup> was added at the end of the measurements as an internal standard to determine the precise potential scale. Potential values are given versus the saturated calomel electrode (SCE). Reversible waves were obtained in all cases; therefore, the potentials ( $E_{p/2}$ ) were estimated at the average of the oxidation and reduction peaks.

#### 4.1.2. Cyclic voltammograms

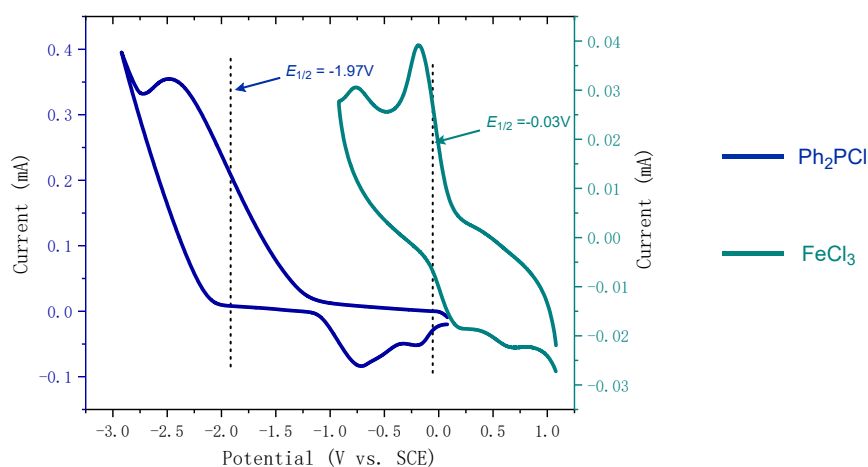

### 4.2. Direct free radical substitution experiments

In order to confirm the radical substitution of the alkyl radicals and chlorophosphines, we conducted a reaction of diphenylphosphorus chloride (**2b**) using dilauryl peroxide (**1b**) as the alkyl radical source. As a result, the target product **30** was isolated in 62% yield, indicating the plausible radical substitution Mechanism.

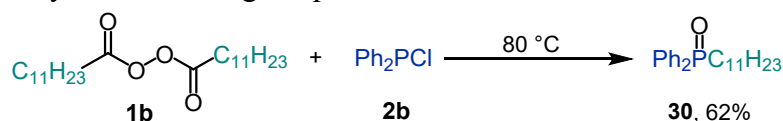

**a:** To a flame-dried Young-type tube was added dilauryl peroxide (**1b**) (199mg, 0.50 mmol, 1.0 equiv.). The tube was evacuated and refilled with N<sub>2</sub>, then



chlorodiphenylphosphine (**2b**) (110 mg, 0.50 mmol, 1.0 equiv.) and CH<sub>3</sub>CN (5.0 mL) were added under N<sub>2</sub> atmosphere. The reaction mixture was stirred at 80 °C for 12 hours. After evaporation of the solvent under reduced pressure, the residue was purified by flash chromatography (petroleum ether/ethyl acetate = 1/1) to give the product **30** (110 mg, 62% yield) as white solid.

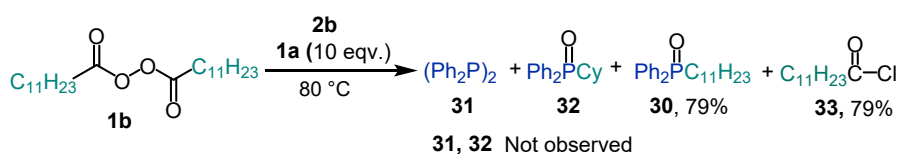

**b:** To a flame-dried Young-type tube was added dilauryl peroxide (**1b**) (80 mg, 0.2mmol). The tube was evacuated and refilled with N<sub>2</sub>, then chlorodiphenylphosphine (**2b**) (110 mg, 0.50 mmol), cyclohexane (420 mg, 5 mmol), and CH<sub>3</sub>CN (5.0 mL) were added under N<sub>2</sub> atmosphere. The reaction mixture was stirred at 80 °C for 12 hours, then trimethyl phosphate (28 mg, 0.2 mmol) was added to this mixture. After evaporation of the solvent under reduced pressure, the residue was analyzed by <sup>1</sup>H NMR, <sup>31</sup>P NMR and GC-MS.

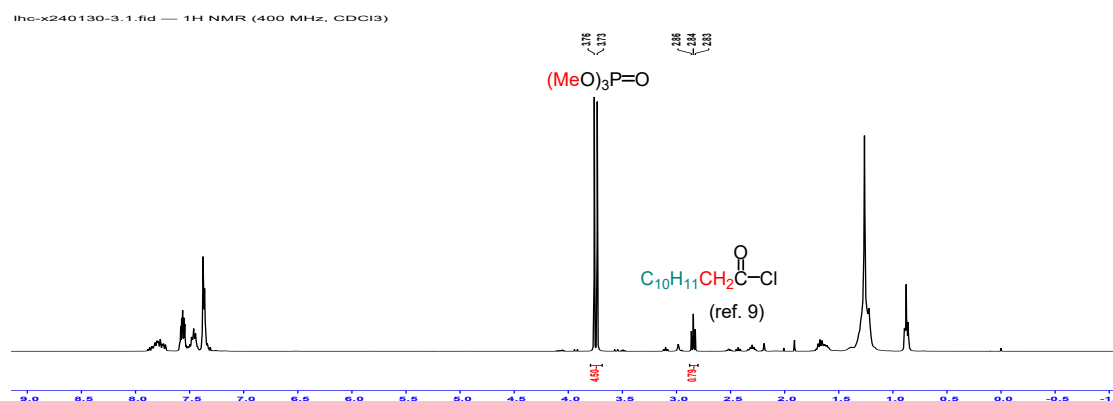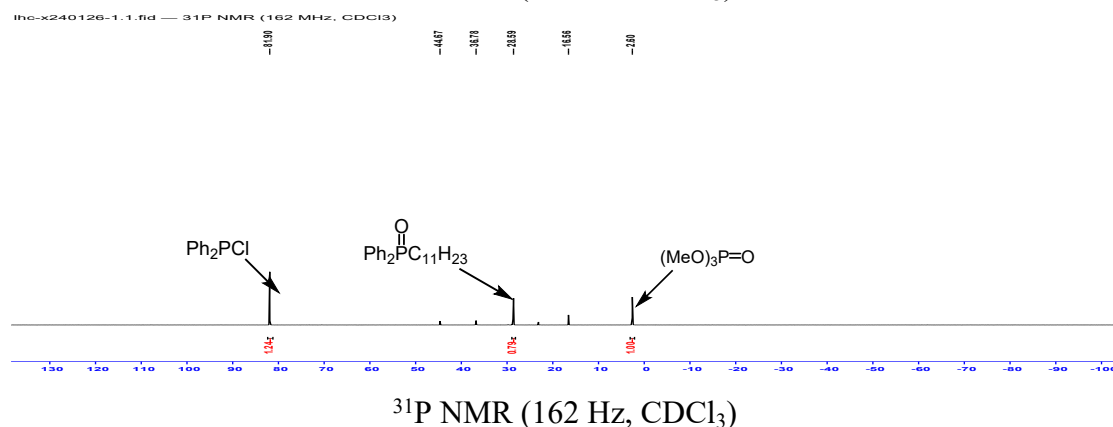

## 4.2 <sup>31</sup>P MR Reaction Monitoring

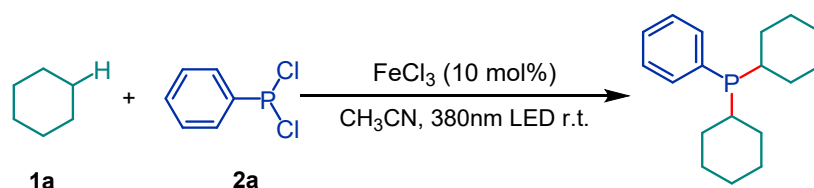

Cyclohexane **1a** (0.5 mL, 5 mmol), dichlorophenylphosphine **2a** (89.5 mg, 0.5 mmol), FeCl<sub>3</sub> (8.1 mg, 10 mol %), Ph<sub>3</sub>PO (139 mg, 0.5 mmol) and CH<sub>3</sub>CN (2.0 mL) were added to a 25 mL flame-dried Young-type tube under N<sub>2</sub> atmosphere. The reaction mixture was stirred at room temperature under 380 nm LED irradiation. After the reaction proceeded for 20 min, a small portion (0.2 mL) of the crude mixture of this reaction was taken out from the reactor. the crude mixture was dissolved in CDCl<sub>3</sub> and then analyzed by <sup>31</sup>P NMR, while the rest mixture was allowed to react for a certain time again. This procedure was repeated seven times.

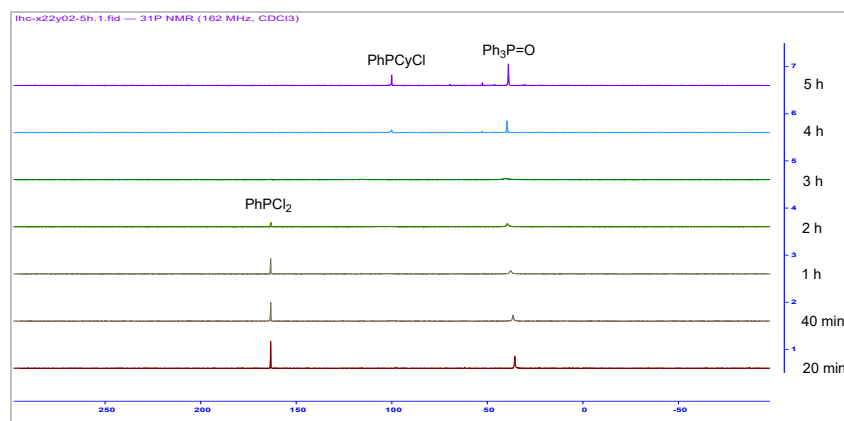

<sup>31</sup>P NMR Reaction Monitoring

## diphenyl(undecyl)phosphine oxide (**30**)<sup>10</sup>

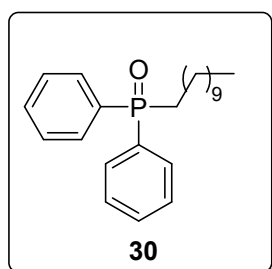

White solid, 110.2 mg, 62% yield, <sup>1</sup>H NMR (500 MHz, CDCl<sub>3</sub>) δ 7.7 – 7.6 (m, 4H), 7.5 – 7.3 (m, 6H), 2.2 – 2.1 (m, 2H), 1.6 – 1.5 (m, 2H), 1.3 – 1.3 (m, 2H), 1.2 – 1.1 (m, 14H), 0.8 (t, *J* = 6.9 Hz, 3H); <sup>13</sup>C NMR (126 MHz, CDCl<sub>3</sub>) δ 133.1 (d, *J* = 97.8 Hz), 131.6 (d, *J* = 2.6 Hz), 130.8 (d, *J* = 9.2 Hz), 128.6 (d, *J* = 11.6 Hz), 31.9, 31.0 (d, *J* = 14.7 Hz), 30.0, 29.7, 29.6, 29.4, 29.3 (d, *J* = 6.0 Hz), 29.1, 22.7, 21.4 (d, *J* = 3.9 Hz), 14.1; <sup>31</sup>P NMR (202 MHz, CDCl<sub>3</sub>) δ 32.80; HRMS (ESI) calcd for C<sub>23</sub>H<sub>34</sub>OP [M+H]<sup>+</sup>: 357.2342, found: 357.2361.

### 4.3 DFT Calculations

#### 4.3.1 Computational methods

Density functional theory (DFT)<sup>11</sup> calculations were performed using Gaussian 16 C.01 software package<sup>12</sup> and the Gaussview<sup>13</sup> was used to generate input geometries and visualize output structures. Geometry optimizations and frequency calculations were performed using the M06 functional with a standard 6-31G\* basis set. Calculations were carried out in the SMD solvation model (CH<sub>3</sub>CN). Vibrational calculations were performed to confirm that no imaginary frequencies (equilibrium structures) or one imaginary frequency (transition structure) exist. IRC calculations were also performed to confirm the desired connection from the transition state. For more accurate electronic energies, single point calculations were performed using Gaussian 16 suite of programs employing M062X density functional and 6-311+G\*\*

#### 4.3.2. Computed energies

DFT Method: M06/6-31G\*/SMD(CH<sub>3</sub>CN)

[values are in Hartree]

| Species                                                                             | Total Electronic Energy | Thermal Correction to Free Energy | Thermal Correction to Enthalpy | Gibbs Free Energy | Imaginary Frequency |
|-------------------------------------------------------------------------------------|-------------------------|-----------------------------------|--------------------------------|-------------------|---------------------|
| Cy·                                                                                 | -235.013724             | 0.124832                          | 0.161736                       | -234.888892       |                     |
| Ph <sub>2</sub> PCI                                                                 | -1264.437966            | 0.142462                          | 0.196779                       | -1264.295504      |                     |
| 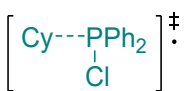 | -1499.464582            | 0.290716                          | 0.360538                       | -1499.173866      | -84.78              |
|  | -1499.495867            | 0.291712                          | 0.363375                       | -1499.204155      |                     |
| Ph <sub>2</sub> P-PPh <sub>2</sub>                                                  | -1608.510372            | 0.311673                          | 0.388859                       | -1608.198699      |                     |
|  | -1843.531871            | 0.460716                          | 0.552510                       | -1843.071155      | -235.02             |
| CyPPh <sub>2</sub>                                                                  | -1039.334119            | 0.296538                          | 0.360204                       | -1039.037581      |                     |
| Ph <sub>2</sub> P·                                                                  | -804.216442             | 0.142554                          | 0.192993                       | -804.073887       |                     |

Table S1 Computed energies of reaction intermediates and transition states.

#### 4.3.3. Optimized structures and Cartesian coordinates

| Species | Optimized Structure |
|---------|---------------------|
|---------|---------------------|

|                              |                                                                                    |             |             |
|------------------------------|------------------------------------------------------------------------------------|-------------|-------------|
| Cy·                          | 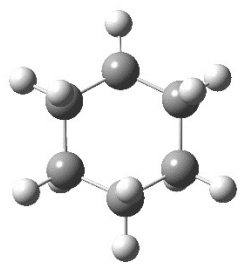 |             |             |
| <b>Cartesian Coordinates</b> |                                                                                    |             |             |
| C                            | 1.28021500                                                                         | 0.76907900  | 0.16150900  |
| C                            | 1.25547100                                                                         | -0.70674600 | -0.24763400 |
| C                            | 0.00000600                                                                         | -1.39546300 | 0.27428300  |
| C                            | -1.25546400                                                                        | -0.70675600 | -0.24763500 |
| C                            | -1.28022200                                                                        | 0.76906900  | 0.16151000  |
| C                            | -0.00000700                                                                        | 1.45277700  | -0.17418700 |
| H                            | 0.00001000                                                                         | -2.45818700 | -0.00883500 |
| H                            | 1.27083200                                                                         | -0.77731600 | -1.34804100 |
| H                            | 2.15960900                                                                         | -1.21532600 | 0.11731900  |
| H                            | 1.45102000                                                                         | 0.81162500  | 1.25861900  |
| H                            | 2.13688500                                                                         | 1.28606300  | -0.29425700 |
| H                            | -1.27082300                                                                        | -0.77732500 | -1.34804200 |
| H                            | -2.15959900                                                                        | -1.21534500 | 0.11731500  |
| H                            | -2.13689700                                                                        | 1.28604600  | -0.29425500 |
| H                            | -1.45102700                                                                        | 0.81161100  | 1.25862000  |
| H                            | -0.00001100                                                                        | 2.51851800  | -0.40379800 |
| H                            | 0.00000500                                                                         | -1.36212800 | 1.37827800  |

| Species                      | Optimized Structure                                                                  |             |             |
|------------------------------|--------------------------------------------------------------------------------------|-------------|-------------|
| Ph <sub>2</sub> PCI          | 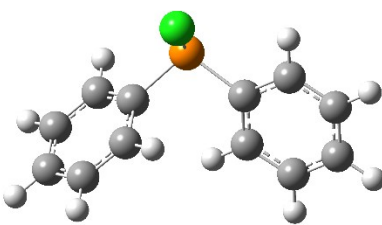 |             |             |
| <b>Cartesian Coordinates</b> |                                                                                      |             |             |
| C                            | -2.46637100                                                                          | -0.06353900 | -1.19159700 |
| C                            | -1.43519600                                                                          | 0.13531400  | -0.26917500 |
| C                            | -1.56473500                                                                          | -0.36683100 | 1.03244000  |
| C                            | -2.71122500                                                                          | -1.05838400 | 1.39952800  |
| C                            | -3.73335800                                                                          | -1.26111600 | 0.47039200  |
| C                            | -3.61155100                                                                          | -0.76740000 | -0.82379900 |
| H                            | -2.37255500                                                                          | 0.33358700  | -2.20306900 |
| H                            | -0.76469800                                                                          | -0.21440000 | 1.75757400  |
| H                            | -2.81115700                                                                          | -1.44423800 | 2.41276300  |
| H                            | -4.62992600                                                                          | -1.80596100 | 0.76209300  |
| H                            | -4.40935000                                                                          | -0.92334400 | -1.54782600 |
| P                            | 0.02102100                                                                           | 1.06374000  | -0.86845800 |
| C                            | 1.41043600                                                                           | -0.00962200 | -0.32789600 |
| C                            | 2.67043400                                                                           | 0.55351900  | -0.08946200 |
| C                            | 1.27677100                                                                           | -1.40276400 | -0.32846900 |
| C                            | 3.76509200                                                                           | -0.25935700 | 0.17991100  |
| H                            | 2.79665300                                                                           | 1.63642000  | -0.10202300 |
| C                            | 2.37865100                                                                           | -2.21422000 | -0.06948900 |
| H                            | 0.30932900                                                                           | -1.86240200 | -0.52838800 |
| C                            | 3.62139900                                                                           | -1.64560000 | 0.19135900  |

|    |            |             |             |
|----|------------|-------------|-------------|
| H  | 4.73582900 | 0.19188500  | 0.37926200  |
| H  | 2.25992900 | -3.29661700 | -0.06540900 |
| H  | 4.48008900 | -2.28136400 | 0.40100700  |
| Cl | 0.14638000 | 2.58060800  | 0.63049600  |

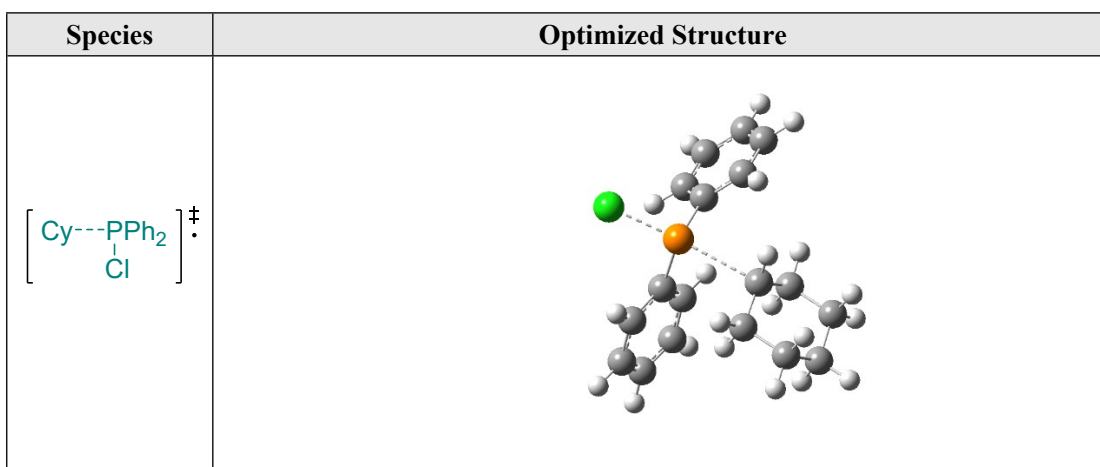

Cartesian Coordinates

|    |             |             |             |
|----|-------------|-------------|-------------|
| C  | 2.00469000  | -1.88322400 | 0.53866200  |
| C  | 1.86984000  | -0.53996400 | 0.17015500  |
| C  | 2.68831100  | -0.02766000 | -0.84502100 |
| C  | 3.60145600  | -0.85066100 | -1.49337200 |
| C  | 3.71434700  | -2.19262200 | -1.13136200 |
| C  | 2.91867300  | -2.70778300 | -0.11274100 |
| H  | 1.39136700  | -2.28914500 | 1.34414500  |
| H  | 2.61704400  | 1.02359800  | -1.12405200 |
| H  | 4.23160200  | -0.44313700 | -2.28242300 |
| H  | 4.43122400  | -2.83485300 | -1.64065000 |
| H  | 3.01195800  | -3.75190200 | 0.18128100  |
| C  | -0.14442600 | 1.52154000  | -0.11725700 |
| C  | -0.87003000 | 2.61985400  | 0.36426600  |
| C  | -0.23296600 | 1.19539100  | -1.47427700 |
| C  | -1.65201200 | 3.38425200  | -0.49341400 |
| H  | -0.82509200 | 2.87753600  | 1.42383900  |
| C  | -1.02655000 | 1.95585900  | -2.33106200 |
| H  | 0.31185100  | 0.33927900  | -1.87036500 |
| C  | -1.73435300 | 3.05049000  | -1.84436100 |
| H  | -2.20511300 | 4.23833600  | -0.10573700 |
| H  | -1.08747300 | 1.68998300  | -3.38535800 |
| H  | -2.35274100 | 3.64339800  | -2.51645600 |
| Cl | 2.15278300  | 2.00604600  | 1.82293600  |
| C  | -1.32483600 | -1.27938900 | 0.83986800  |
| C  | -2.51958900 | -0.44319500 | 1.16052400  |
| C  | -1.37426500 | -1.96464800 | -0.48503700 |
| H  | -0.91813200 | -1.86578900 | 1.67024400  |
| C  | -3.76818300 | -1.34284500 | 1.13177000  |
| H  | -2.64409900 | 0.34311200  | 0.39512800  |
| H  | -2.41763800 | 0.05672800  | 2.13458000  |
| C  | -2.62504500 | -2.86477500 | -0.51929700 |
| H  | -1.46689200 | -1.21707600 | -1.29160400 |
| H  | -0.46806400 | -2.55522700 | -0.67897500 |
| C  | -3.88150300 | -2.05883700 | -0.20953900 |
| H  | -4.66588500 | -0.74024100 | 1.33215100  |
| H  | -3.69443900 | -2.08855000 | 1.94045400  |
| H  | -2.70324500 | -3.35207100 | -1.50196600 |
| H  | -2.51063400 | -3.66661700 | 0.22865100  |
| H  | -4.76428200 | -2.71447500 | -0.21730700 |
| H  | -4.03573500 | -1.31040500 | -1.00571400 |
| P  | 0.68704900  | 0.47226900  | 1.13928000  |

| Species                                                      | Optimized Structure |             |             |
|--------------------------------------------------------------|---------------------|-------------|-------------|
| $\text{Cy}-\overset{\cdot}{\text{P}}\text{Ph}_2$ $\text{Cl}$ |                     |             |             |
| Cartesian Coordinates                                        |                     |             |             |
| C                                                            | 2.28248400          | -1.56289200 | -0.36830000 |
| C                                                            | 1.84830700          | -0.26523900 | -0.05815900 |
| C                                                            | 2.75333900          | 0.80278900  | -0.15677600 |
| C                                                            | 4.05166400          | 0.57953500  | -0.59796400 |
| C                                                            | 4.46849500          | -0.70858400 | -0.92818600 |
| C                                                            | 3.58325100          | -1.77763100 | -0.80802100 |
| H                                                            | 1.60384300          | -2.41012900 | -0.27109900 |
| H                                                            | 2.44091400          | 1.81214400  | 0.10984700  |
| H                                                            | 4.74304800          | 1.41635500  | -0.68054400 |
| H                                                            | 5.48691800          | -0.88025100 | -1.27239000 |
| H                                                            | 3.90658700          | -2.78665200 | -1.05781600 |
| C                                                            | -0.39938000         | 1.62643600  | 0.12149400  |
| C                                                            | -1.22153800         | 2.32611200  | 1.01337100  |
| C                                                            | -0.10623400         | 2.18097700  | -1.13237800 |
| C                                                            | -1.75358500         | 3.56005900  | 0.65250100  |
| H                                                            | -1.44065000         | 1.90228200  | 1.99452500  |
| C                                                            | -0.63660600         | 3.41740900  | -1.48374900 |
| H                                                            | 0.53172900          | 1.64539000  | -1.83499900 |
| C                                                            | -1.45926900         | 4.10581600  | -0.59387100 |
| H                                                            | -2.39259500         | 4.09857400  | 1.34998500  |
| H                                                            | -0.40880500         | 3.84384400  | -2.45925500 |
| H                                                            | -1.87064100         | 5.07419600  | -0.87387200 |
| Cl                                                           | 0.42370800          | -0.88567300 | 3.12546200  |
| C                                                            | -0.94491300         | -1.28582000 | 0.00952700  |
| C                                                            | -2.31786200         | -1.14066700 | 0.67050500  |
| C                                                            | -1.06973800         | -1.27401900 | -1.51631200 |
| H                                                            | -0.50424700         | -2.24329600 | 0.33780200  |
| C                                                            | -3.25253100         | -2.25074200 | 0.20002900  |
| H                                                            | -2.74818200         | -0.16241000 | 0.39549700  |
| H                                                            | -2.21477000         | -1.15410700 | 1.76503700  |
| C                                                            | -2.00739200         | -2.38720200 | -1.97719300 |
| H                                                            | -1.47833700         | -0.29946200 | -1.83290100 |
| H                                                            | -0.08356700         | -1.37843400 | -1.99119300 |
| C                                                            | -3.37603700         | -2.26472300 | -1.31885700 |
| H                                                            | -4.23940500         | -2.12774700 | 0.66812000  |
| H                                                            | -2.85755100         | -3.22195500 | 0.54302600  |
| H                                                            | -2.09929300         | -2.36252100 | -3.07238600 |
| H                                                            | -1.56220900         | -3.36258300 | -1.71769300 |
| H                                                            | -4.03195600         | -3.08529300 | -1.64280300 |
| H                                                            | -3.85352300         | -1.32711100 | -1.65120400 |
| P                                                            | 0.21432800          | -0.00160500 | 0.64636600  |

| Species | Optimized Structure |
|---------|---------------------|
|---------|---------------------|

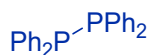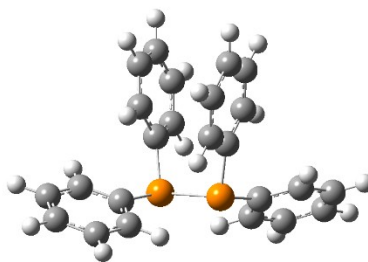

Cartesian Coordinates

|   |             |             |             |
|---|-------------|-------------|-------------|
| P | 0.59529100  | -1.15113600 | 0.95741900  |
| P | -0.59543200 | -1.15112700 | -0.95735400 |
| C | -0.50759800 | 0.60142500  | -1.50123000 |
| C | -1.33280700 | 1.62755700  | -1.02527600 |
| C | 0.50845700  | 0.91831200  | -2.41185700 |
| C | -1.14756500 | 2.93754000  | -1.45479900 |
| H | -2.12363200 | 1.40420400  | -0.30922200 |
| C | 0.70274900  | 2.23234800  | -2.82964200 |
| H | 1.15546700  | 0.12792600  | -2.79647600 |
| C | -0.12739700 | 3.24399000  | -2.35399100 |
| H | -1.79714700 | 3.72584100  | -1.07596100 |
| H | 1.49856900  | 2.46353900  | -3.53621800 |
| H | 0.01809700  | 4.27115200  | -2.68521800 |
| C | -2.31481700 | -1.32037400 | -0.31428200 |
| C | -2.63038200 | -1.97630300 | 0.88134400  |
| C | -3.36765300 | -0.91578100 | -1.14921100 |
| C | -3.95740600 | -2.19763400 | 1.24311500  |
| H | -1.83583300 | -2.32257400 | 1.54217400  |
| C | -4.69167800 | -1.13265700 | -0.78405500 |
| H | -3.15141100 | -0.42208100 | -2.09750100 |
| C | -4.99251200 | -1.77296400 | 0.41620700  |
| H | -4.17935100 | -2.70486300 | 2.18112100  |
| H | -5.49250500 | -0.80276400 | -1.44442800 |
| H | -6.02917200 | -1.94367700 | 0.70218100  |
| C | 2.31468200  | -1.32050100 | 0.31438300  |
| C | 3.36754200  | -0.91563000 | 1.14913100  |
| C | 2.63019500  | -1.97678000 | -0.88107200 |
| C | 4.69155400  | -1.13259400 | 0.78397200  |
| H | 3.15133900  | -0.42161700 | 2.09726800  |
| C | 3.95720100  | -2.19820700 | -1.24283700 |
| H | 1.83561200  | -2.32324000 | -1.54176400 |
| C | 4.99234100  | -1.77327200 | -0.41610100 |
| H | 5.49240500  | -0.80246500 | 1.44420000  |
| H | 4.17911000  | -2.70572000 | -2.18069800 |
| H | 6.02899000  | -1.94406800 | -0.70206400 |
| C | 0.50761400  | 0.60145600  | 1.50119800  |
| C | 1.33290400  | 1.62746200  | 1.02511200  |
| C | -0.50833600 | 0.91853200  | 2.41187600  |
| C | 1.14784500  | 2.93750200  | 1.45454000  |
| H | 2.12366500  | 1.40396800  | 0.30903000  |
| C | -0.70244700 | 2.23262300  | 2.82957200  |
| H | -1.15538700 | 0.12825000  | 2.79664100  |
| C | 0.12777600  | 3.24414000  | 2.35377800  |
| H | 1.79751200  | 3.72568900  | 1.07561200  |
| H | -1.49818800 | 2.46395800  | 3.53619000  |
| H | -0.01759100 | 4.27134600  | 2.68492400  |

Species

Optimized Structure

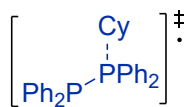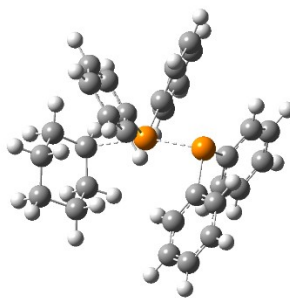

Cartesian Coordinates

|   |             |             |             |
|---|-------------|-------------|-------------|
| P | 0.93960200  | 1.06077700  | -1.25988500 |
| P | -0.23413200 | -0.49092800 | 0.08247000  |
| C | 1.04343100  | -1.80504000 | -0.12017000 |
| C | 1.34633000  | -2.42223800 | -1.34010100 |
| C | 1.84286100  | -2.09351800 | 0.99308100  |
| C | 2.40477600  | -3.32191400 | -1.43612300 |
| H | 0.75358500  | -2.19571800 | -2.22687000 |
| C | 2.90572000  | -2.98748800 | 0.89684300  |
| H | 1.64270800  | -1.59938000 | 1.94591900  |
| C | 3.18497800  | -3.60828000 | -0.31804500 |
| H | 2.62431600  | -3.79659800 | -2.39160100 |
| H | 3.51767800  | -3.19704000 | 1.77310700  |
| H | 4.01393200  | -4.31026000 | -0.39566800 |
| C | -1.52865400 | -0.92812500 | -1.15243200 |
| C | -2.30503900 | 0.10333900  | -1.69910100 |
| C | -1.87044500 | -2.25150600 | -1.45420500 |
| C | -3.38627900 | -0.17966200 | -2.52807700 |
| H | -2.07329700 | 1.14448700  | -1.46494700 |
| C | -2.95665000 | -2.53516800 | -2.27843700 |
| H | -1.28737400 | -3.07270300 | -1.03669300 |
| C | -3.71733600 | -1.50132700 | -2.81813000 |
| H | -3.97445700 | 0.63659800  | -2.94515800 |
| H | -3.20745500 | -3.57169500 | -2.50027600 |
| H | -4.56593400 | -1.72476500 | -3.46288200 |
| C | 0.12882700  | 2.63038900  | -0.71348900 |
| C | -0.01618700 | 3.62332000  | -1.69170800 |
| C | -0.39102800 | 2.87828700  | 0.56463900  |
| C | -0.64256000 | 4.83256800  | -1.39983100 |
| H | 0.36714000  | 3.44417300  | -2.69763300 |
| C | -1.02293900 | 4.08353300  | 0.85735400  |
| H | -0.31659400 | 2.11617500  | 1.34022300  |
| C | -1.14785400 | 5.06485300  | -0.12353500 |
| H | -0.74179700 | 5.59182200  | -2.17441000 |
| H | -1.42320800 | 4.25241100  | 1.85679300  |
| H | -1.64420500 | 6.00680900  | 0.10537900  |
| C | 2.51253400  | 1.01939800  | -0.30500700 |
| C | 2.68019000  | 1.49392600  | 1.00251300  |
| C | 3.59605400  | 0.38536800  | -0.92970500 |
| C | 3.89338600  | 1.32975900  | 1.66608500  |
| H | 1.85971000  | 1.99809500  | 1.51277000  |
| C | 4.80607100  | 0.21435000  | -0.26461900 |
| H | 3.48486100  | 0.01411100  | -1.95005900 |
| C | 4.95674300  | 0.68482800  | 1.03807700  |
| H | 4.00655700  | 1.70452700  | 2.68272300  |
| H | 5.63380100  | -0.28590200 | -0.76580900 |
| H | 5.90259100  | 0.55356800  | 1.56165900  |
| C | -3.80391100 | -1.23633000 | 1.56631900  |
| C | -2.68049000 | -2.24310000 | 1.80040400  |
| C | -1.35186200 | -1.60387000 | 2.07745000  |
| C | -1.36770600 | -0.47120300 | 3.06069400  |
| C | -2.48674800 | 0.52569800  | 2.76857900  |



|   |             |             |            |
|---|-------------|-------------|------------|
| C | -3.83305800 | -0.18154600 | 2.66632500 |
| H | -0.52284500 | -2.30933400 | 2.18640500 |
| H | -2.94568300 | -2.85033500 | 2.69191200 |
| H | -2.61380400 | -2.95743600 | 0.96717700 |
| H | -3.65425300 | -0.73831700 | 0.59368500 |
| H | -4.76775800 | -1.76230900 | 1.50641200 |
| H | -1.53119300 | -0.88641100 | 4.07627400 |
| H | -0.38753100 | 0.03197800  | 3.09309700 |
| H | -2.51113000 | 1.30601500  | 3.54351100 |
| H | -2.28020800 | 1.03542400  | 1.81075500 |
| H | -4.06219500 | -0.66679600 | 3.63151000 |
| H | -4.63695900 | 0.54528900  | 2.48001900 |

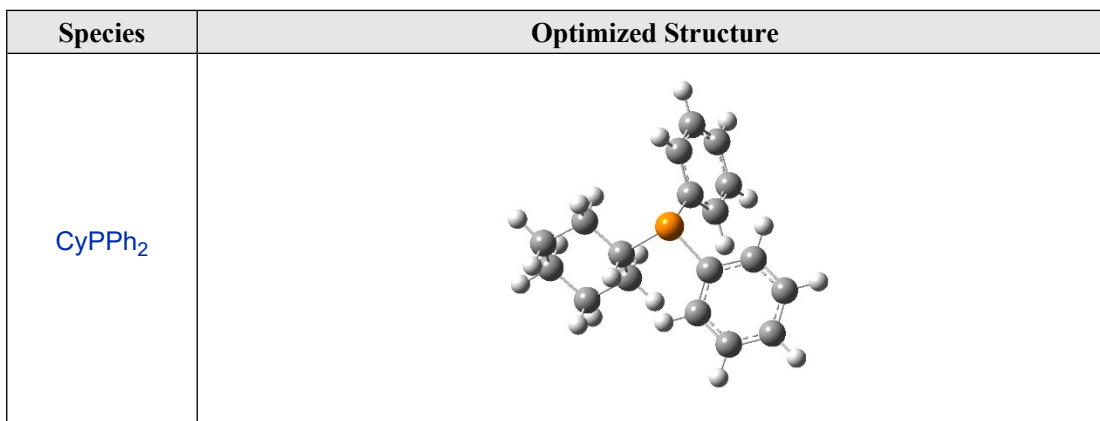

Cartesian Coordinates

|   |             |             |             |
|---|-------------|-------------|-------------|
| C | -2.17898400 | -1.72696800 | -0.12415200 |
| C | -1.84003800 | -0.41847100 | -0.49035800 |
| C | -2.83566700 | 0.56714900  | -0.42313400 |
| C | -4.11671000 | 0.26152900  | 0.02334500  |
| C | -4.43573200 | -1.04199300 | 0.39898300  |
| C | -3.46399300 | -2.03461000 | 0.31806500  |
| H | -1.43797300 | -2.52436200 | -0.18291700 |
| H | -2.60530000 | 1.59103500  | -0.72164200 |
| H | -4.87098300 | 1.04579000  | 0.07509000  |
| H | -5.43892900 | -1.28281000 | 0.74737700  |
| H | -3.70292900 | -3.05838200 | 0.60344400  |
| C | 0.27199100  | 1.54198300  | -0.36485200 |
| C | 1.12312100  | 2.41797600  | -1.04942300 |
| C | -0.12280000 | 1.87460300  | 0.93773600  |
| C | 1.58041700  | 3.58841400  | -0.44820500 |
| H | 1.42914900  | 2.18022400  | -2.07000600 |
| C | 0.32356400  | 3.04892200  | 1.53586100  |
| H | -0.79054300 | 1.21235200  | 1.48919100  |
| C | 1.17815000  | 3.90681400  | 0.84539400  |
| H | 2.24350000  | 4.25652700  | -0.99602700 |
| H | 0.00552900  | 3.29439300  | 2.54838000  |
| H | 1.52618900  | 4.82525100  | 1.31591600  |
| C | 0.95663800  | -1.26573800 | -0.51636000 |
| C | 2.35026200  | -1.06048900 | -1.11685200 |
| C | 1.03930700  | -1.32887300 | 1.00673600  |
| H | 0.57629500  | -2.23338400 | -0.89246400 |
| C | 3.31062800  | -2.15621900 | -0.66410600 |
| H | 2.73997700  | -0.07941600 | -0.79170800 |
| H | 2.29295800  | -1.02841900 | -2.21583500 |
| C | 1.99097500  | -2.43520800 | 1.45490700  |
| H | 1.41039800  | -0.36053100 | 1.38368400  |
| H | 0.04287100  | -1.47830300 | 1.44805400  |
| C | 3.37889200  | -2.24063900 | 0.85616700  |
| H | 4.31038000  | -1.97983000 | -1.08706500 |

|   |             |             |             |
|---|-------------|-------------|-------------|
| H | 2.96401000  | -3.12399200 | -1.06549300 |
| H | 2.04440100  | -2.46458100 | 2.55309200  |
| H | 1.58835600  | -3.41096400 | 1.13195700  |
| H | 4.05093100  | -3.05413200 | 1.16591200  |
| H | 3.81224700  | -1.30522000 | 1.25037000  |
| P | -0.21671000 | -0.00069000 | -1.25118800 |

| Species               | Optimized Structure |             |             |
|-----------------------|---------------------|-------------|-------------|
| Ph <sub>2</sub> P·    |                     |             |             |
| Cartesian Coordinates |                     |             |             |
| C                     | -2.63974600         | 1.00989300  | -0.47877700 |
| C                     | -1.43849600         | 0.48233200  | 0.03240600  |
| C                     | -1.47086200         | -0.79549400 | 0.62147000  |
| C                     | -2.65280600         | -1.52377900 | 0.66934200  |
| C                     | -3.82821900         | -0.99502800 | 0.13642600  |
| C                     | -3.81863500         | 0.27667100  | -0.43469400 |
| H                     | -2.64023500         | 2.00636900  | -0.92379000 |
| H                     | -0.56592700         | -1.21495200 | 1.05938000  |
| H                     | -2.65975500         | -2.50971500 | 1.13207000  |
| H                     | -4.75180800         | -1.57044000 | 0.17396200  |
| H                     | -4.73437600         | 0.69796500  | -0.84678200 |
| P                     | 0.00001200          | 1.58181200  | 0.00002800  |
| C                     | 1.43848800          | 0.48230700  | -0.03235500 |
| C                     | 2.63977600          | 1.00989200  | 0.47872800  |
| C                     | 1.47082500          | -0.79553800 | -0.62137600 |
| C                     | 3.81866400          | 0.27668100  | 0.43458400  |
| H                     | 2.64025400          | 2.00637600  | 0.92372700  |
| C                     | 2.65277400          | -1.52381800 | -0.66931000 |
| H                     | 0.56586700          | -1.21504100 | -1.05919700 |
| C                     | 3.82821400          | -0.99504100 | -0.13649500 |
| H                     | 4.73444500          | 0.69797600  | 0.84658100  |
| H                     | 2.65966700          | -2.50977400 | -1.13199500 |
| H                     | 4.75182500          | -1.57041700 | -0.17406100 |

### References:

- (1) Q. Chen, J. Zeng, X. Yan, Y. Huang, Z. Du, K. Zhang and C. Wen, Mild and efficient oxidation of phosphorus(III) compounds with Selectfluor, *Tetrahedron Lett.*, 2016, **57**, 3379-3381.
- (2) A. Sato, H. Yorimitsu and K. Oshima, Radical Phosphination of Organic Halides and Alkyl Imidazole-1-carbothioates, *J. Am. Chem. Soc.*, 2006, **128**, 4240-4241.
- (3) Q. Chen, X. Yan, Z. Du, K. Zhang and C. Wen, P-Arylation of Dialkyl Phosphites and Secondary Phosphine Oxides with Arynes, *J. Org. Chem.*, 2016, **81**, 276-281.
- (4) G. Keglevich, E. Jablonkai and L. B. Balázs, A “green” variation of the Hirao reaction: the P–C coupling of diethyl phosphite, alkyl phenyl-H-phosphinates and secondary phosphine oxides

- 
- with bromoarenes using a P-ligand-free Pd(OAc)<sub>2</sub> catalyst under microwave and solvent-free conditions, *RSC Advances*, 2014, **4**, 22808-22816.
- (5) M. Zhang, Z. Ma, H. Du and Z. Wang, Palladium-catalyzed C(sp<sup>3</sup>)–P(III) bond formation reaction with acylphosphines as phosphorus source, *Tetrahedron Lett.*, 2020, **61**, 152125.
- (6) A. Bell, A. H. Davidson, C. Earnshaw, H. K. Norrish, R. S. Torr, D. B. Trowbridge and S. Warren, Synthesis of β-(diphenylphosphinoyl) ketones, *J. Chem. Soc., Perkin Trans. 1*, 1983, 2879-2891.
- (7) V. T. Trepohl, S. Mori, K. Itami and M. Oestreich, Palladium(II)-Catalyzed Conjugate Phosphination of Electron-Deficient Acceptors, *Org. Lett.*, 2009, **11**, 1091-1094.
- (8) R. A. Stockland, R. I. Taylor, L. E. Thompson and P. B. Patel, Microwave-Assisted Regioselective Addition of P(O)–H Bonds to Alkenes without Added Solvent or Catalyst, *Org. Lett.*, 2005, **7**, 851-853.
- (9) A. J. Carnell, R. Kirk, M. Smith, S. McKenna, L.-Y. Lian and R. Gibson, Inhibition of Human α-Methylacyl CoA Racemase (AMACR): a Target for Prostate Cancer, *ChemMedChem*, 2013, **8**, 1643-1647.
- (10) S. E. Vaillard, C. Mück-Lichtenfeld, S. Grimme and A. Studer, Homolytic Substitution at Phosphorus for the Synthesis of Alkyl and Aryl Phosphanes, *Angew. Chem. Int. Ed.*, 2007, **46**, 6533-6536.
- (11) R. G. Parr, W. Yang, *Density-Functional Theory of Atoms and Molecules*, vol. 16 of *International Series of Monographs on Chemistry*; Oxford Univ. Press, 1989.
- (12) M. J. Frisch, G. W. Trucks, H. B. Schlegel, G. E. Scuseria, M. A. Robb, J. R. Cheeseman, G. Scalmani, V. Barone, G. A. Petersson, H. Nakatsuji, X. Li, M. Caricato, A. V. Marenich, J. Bloino, B. G. Janesko, R. Gomperts, B. Mennucci, H. P. Hratchian, J. V. Ortiz, A. F. Izmaylov, J. L. Sonnenberg, D. Williams-Young, F. Ding, F. Lipparini, F. Egidi, J. Goings, B. Peng, A. Petrone, T. Henderson, D. Ranasinghe, V. G. Zakrzewski, J. Gao, N. Rega, G. Zheng, W. Liang, M. Hada, M. Ehara, K. Toyota, R. Fukuda, J. Hasegawa, M. Ishida, T. Nakajima, Y. Honda, O. Kitao, H. Nakai, T. Vreven, K. Throssell, J. A. Montgomery Jr., J. E. Peralta, F. Ogliaro, M. J. Bearpark, J. J. Heyd, E. N. Brothers, K. N. Kudin, V. N. Staroverov, T. A. Keith, R. Kobayashi, J. Normand, K. Raghavachari, A. P. Rendell, J. C. Burant, S. S. Iyengar, J. Tomasi, M. Cossi, J. M. Millam, M. Klene, C. Adamo, R. Cammi, J. W. Ochterski, R. L. Martin, K. Morokuma, O. Farkas, J. B. Foresman, D. J. Fox, Gaussian 16, revision C.01 (Gaussian, Inc., 2016).
- (13) R. Dennington, T. Keith, J. Millam, Gauss View, Version 5 (Semichem, Inc., 2009).

## 5. NMR Spectra of Products

### $^1\text{H}$ NMR (400 MHz, $\text{CDCl}_3$ ) spectra for **3**

lhc-x22x08-1.1.fid —  $^1\text{H}$  NMR (400 MHz,  $\text{CDCl}_3$ )

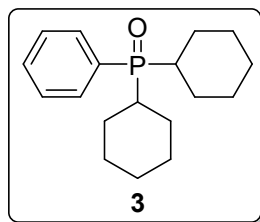

7.60  
7.58  
7.56  
7.45  
7.44  
7.41  
7.39  
7.37

1.98  
1.95  
1.75  
1.73  
1.67  
1.65  
1.61  
1.57  
1.52  
1.27  
1.23  
1.21  
1.19  
1.17  
1.14  
1.10  
1.06  
1.03

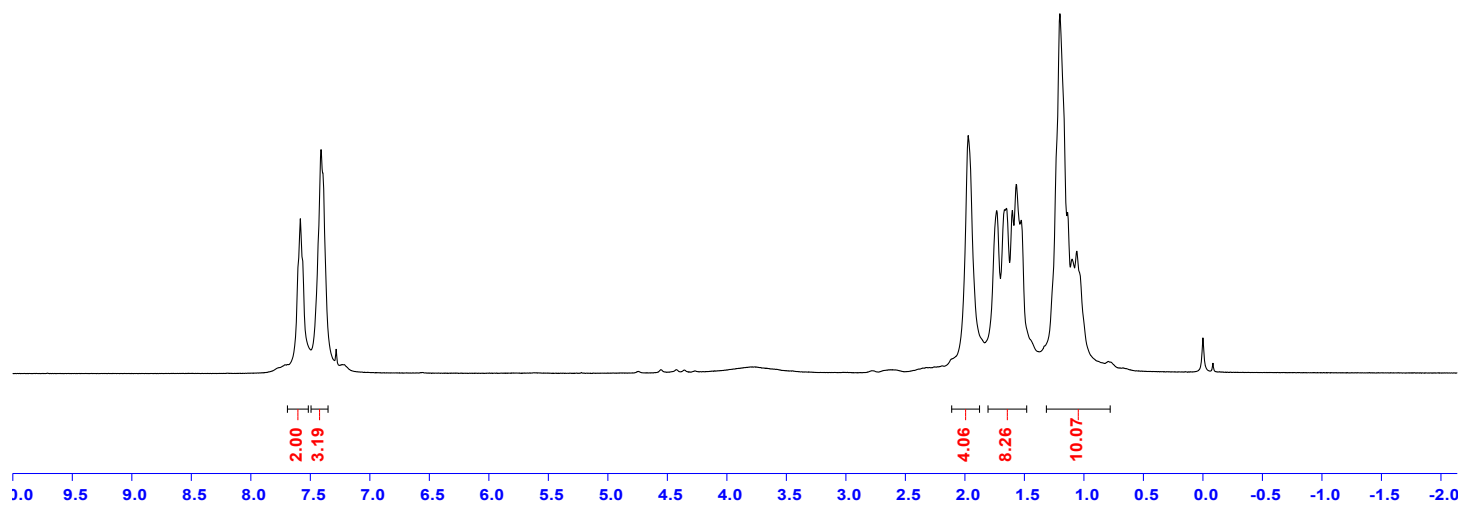

**$^{13}\text{C}$  NMR (101 MHz,  $\text{CDCl}_3$ ) spectra for 3**

lhc-x22x08-1.2.fid —  $^1\text{H}$  NMR (400 MHz,  $\text{CDCl}_3$ )

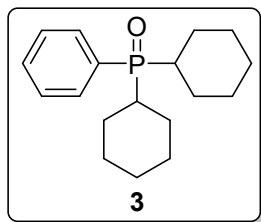

131.41  
131.34  
131.22  
131.20  
130.11  
129.26  
128.25  
128.15

35.36  
34.69  
26.42  
26.32  
26.29  
26.20  
25.76  
25.42  
25.40  
24.54  
24.51

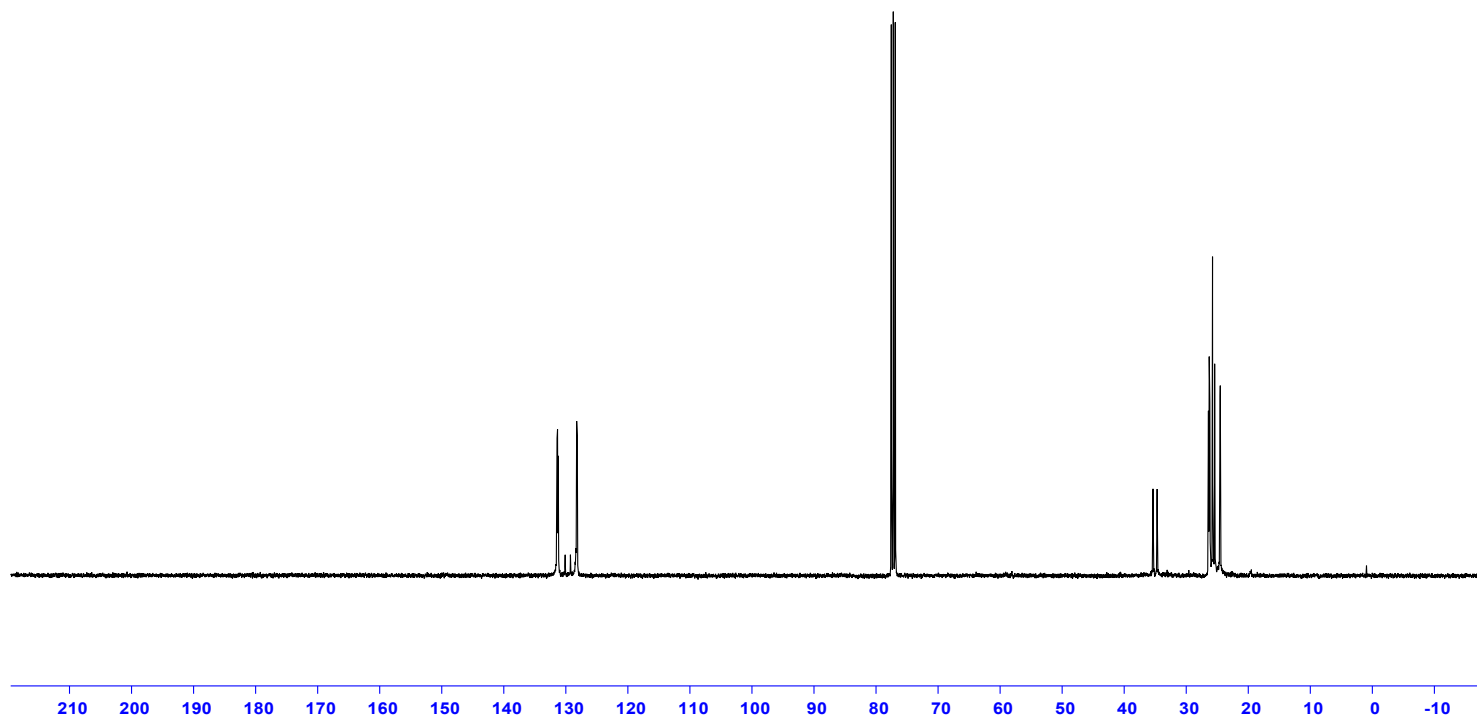

**<sup>31</sup>P NMR (162 MHz, CDCl<sub>3</sub>) spectra for 3**

lhc-x22x08-1.3.fid — 1H NMR (400 MHz, CDCl<sub>3</sub>)

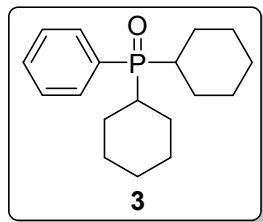

— 45.57

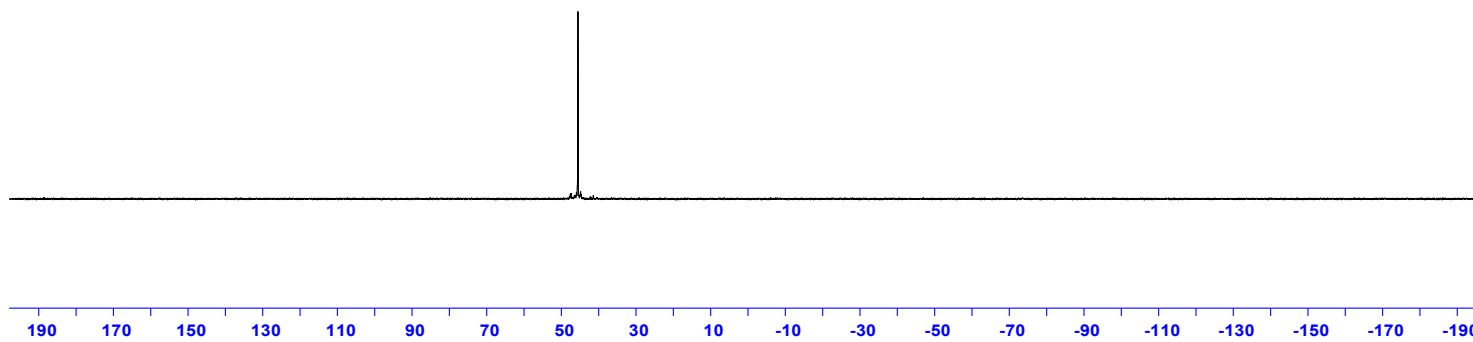

**<sup>1</sup>H NMR (500 MHz, CDCl<sub>3</sub>) spectra for 4**

lhc-x230729-2.1.fid — <sup>1</sup>H NMR (400 MHz, CDCl<sub>3</sub>)

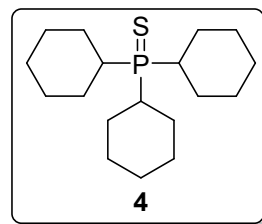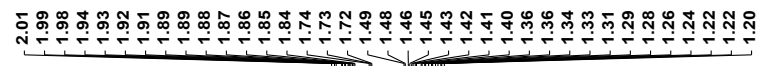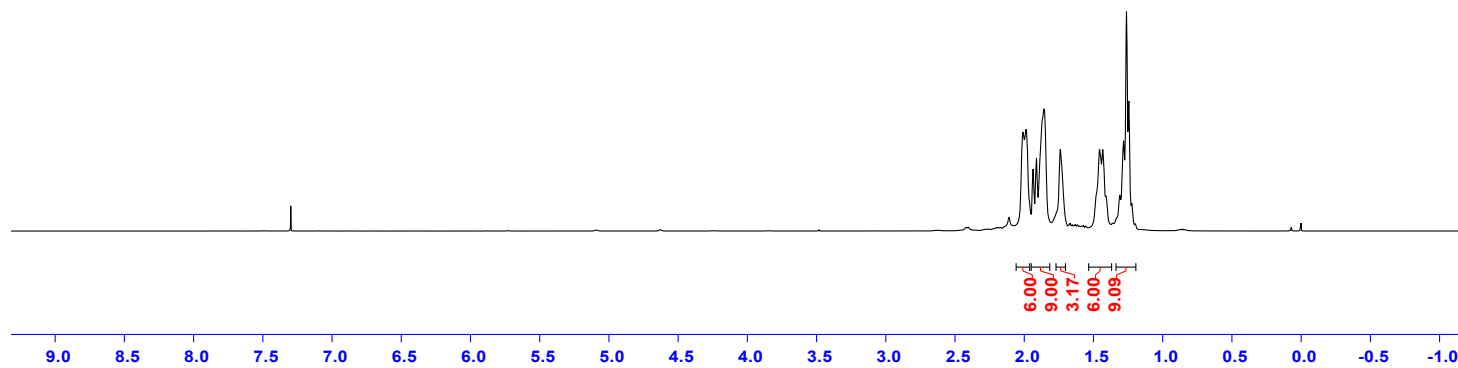

**$^{13}\text{C}$  NMR (126 MHz,  $\text{CDCl}_3$ ) spectra for 4**

lhc-x230729-2.2.fid —  $^{13}\text{C}$  NMR (100 MHz,  $\text{CDCl}_3$ )

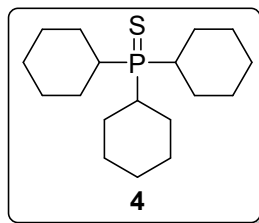

37.17  
36.81  
27.23  
27.21  
27.07  
26.97  
26.06  
26.04

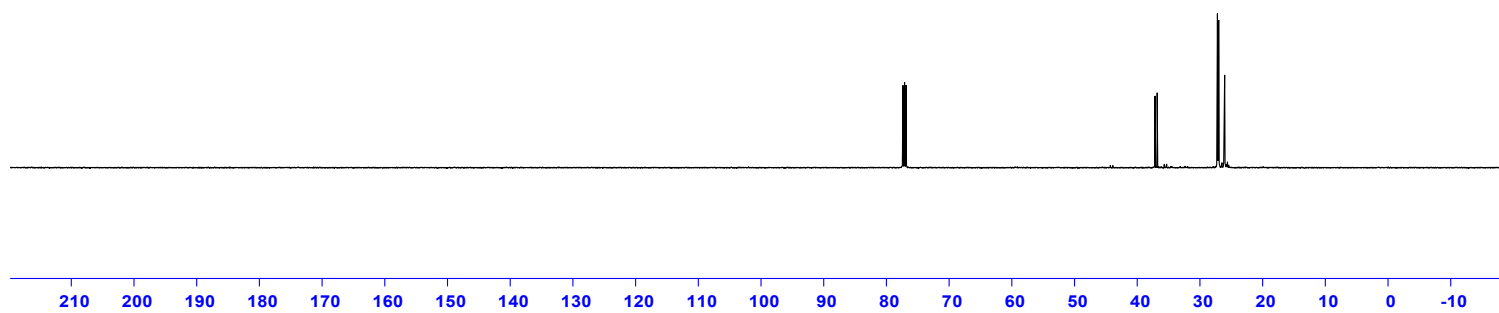



**<sup>31</sup>P NMR (202 MHz, CDCl<sub>3</sub>) spectra for 4**

lhc-x230729-2.3.fid — 1H NMR (400 MHz, CDCl<sub>3</sub>)

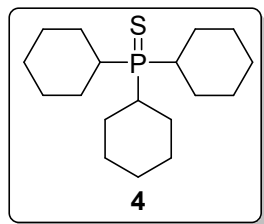

— 62.03

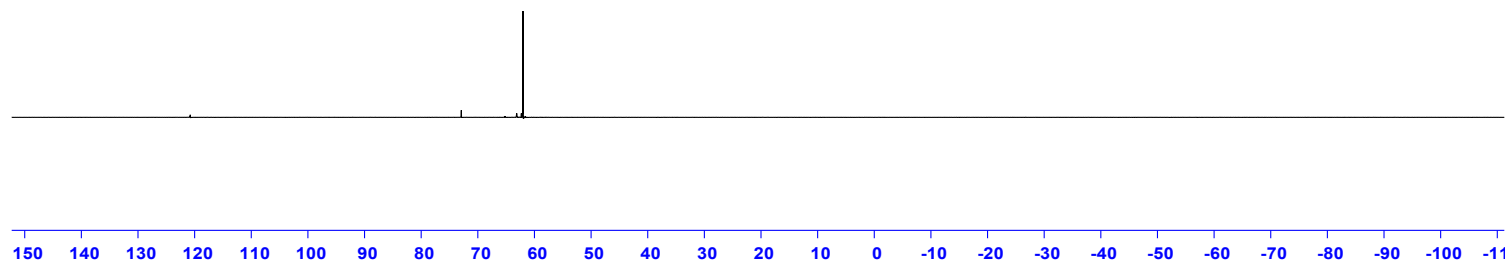

**<sup>1</sup>H NMR (400 MHz, CDCl<sub>3</sub>) spectra for 5**

lhc-x22x24-4-c5.1.fid — 1H NMR (400 MHz, CDCl<sub>3</sub>)

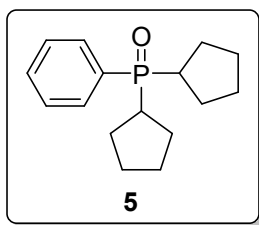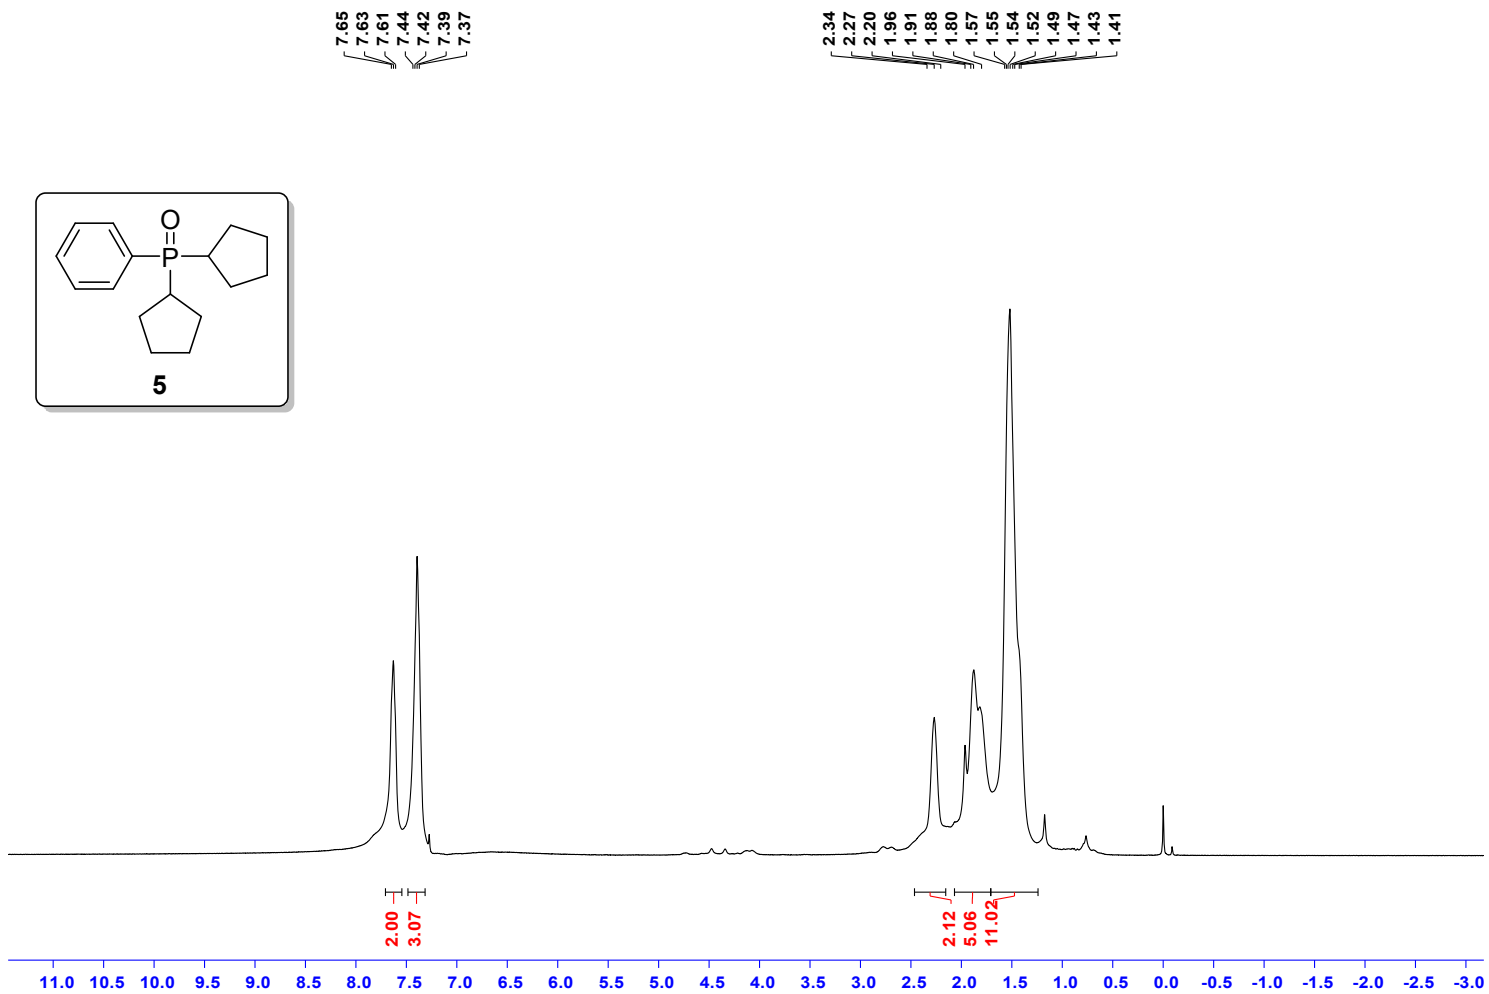

# <sup>13</sup>C NMR (101 MHz, CDCl<sub>3</sub>) spectra for 5

lhc-x22x24-4.11.fid — 1H NMR (400 MHz, CDCl<sub>3</sub>)

132.03  
131.61  
131.34  
131.11  
131.03  
128.43  
128.33

37.87  
37.15  
27.08  
26.74  
26.65  
26.12  
26.06  
25.97

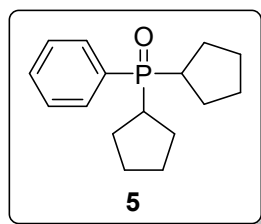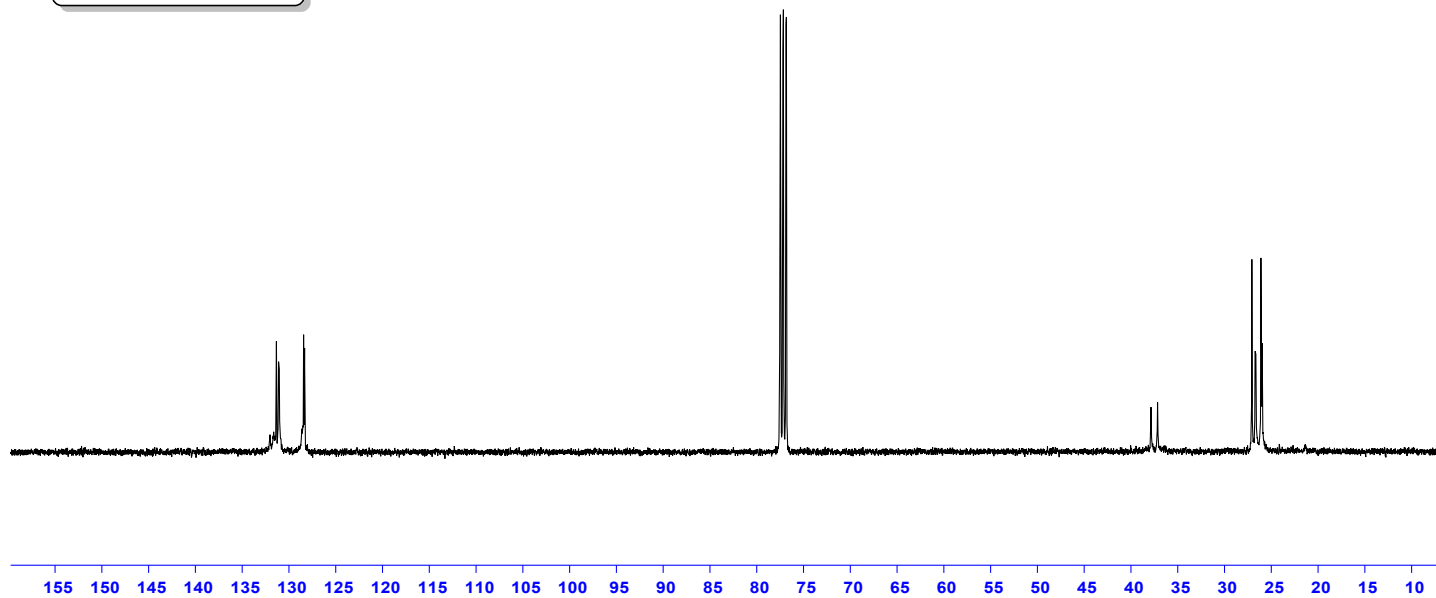

**$^{31}\text{P}$  NMR (162 MHz,  $\text{CDCl}_3$ ) spectra for 5**

lhc-x22x24-4-c5.2.fid — 1H NMR (400 MHz,  $\text{CDCl}_3$ )

— 47.27

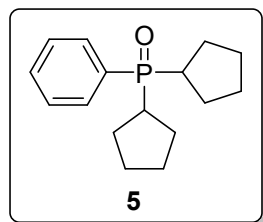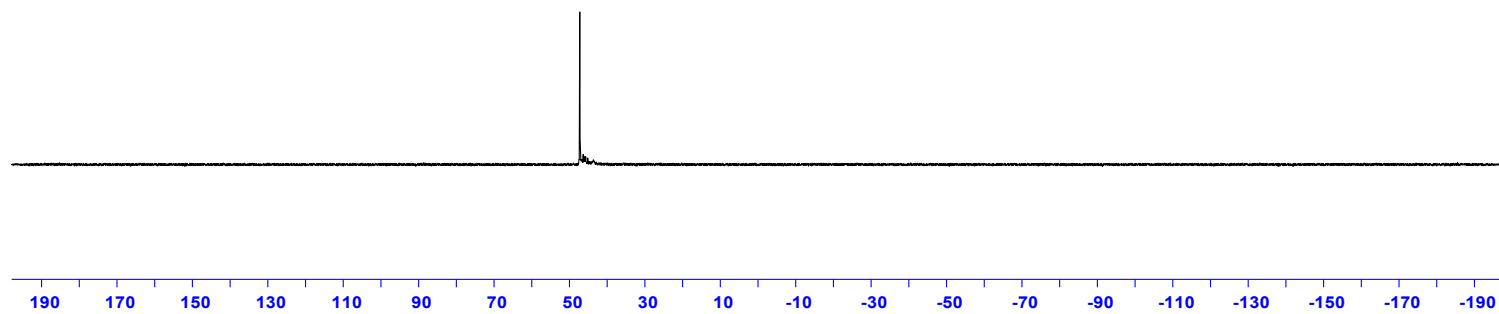

**<sup>1</sup>H NMR (400 MHz, CDCl<sub>3</sub>) spectra for 6**

lhc-x22x24-3-c7.1.fid — 1H NMR (400 MHz, CDCl<sub>3</sub>)

7.62  
7.60  
7.58  
7.45  
7.43  
7.41  
7.40  
7.38  
7.26

2.18  
2.15  
2.12  
1.99  
1.89  
1.66  
1.64  
1.48  
1.46  
1.43  
1.40  
1.38  
1.34  
1.18

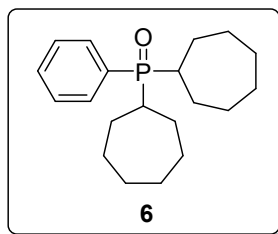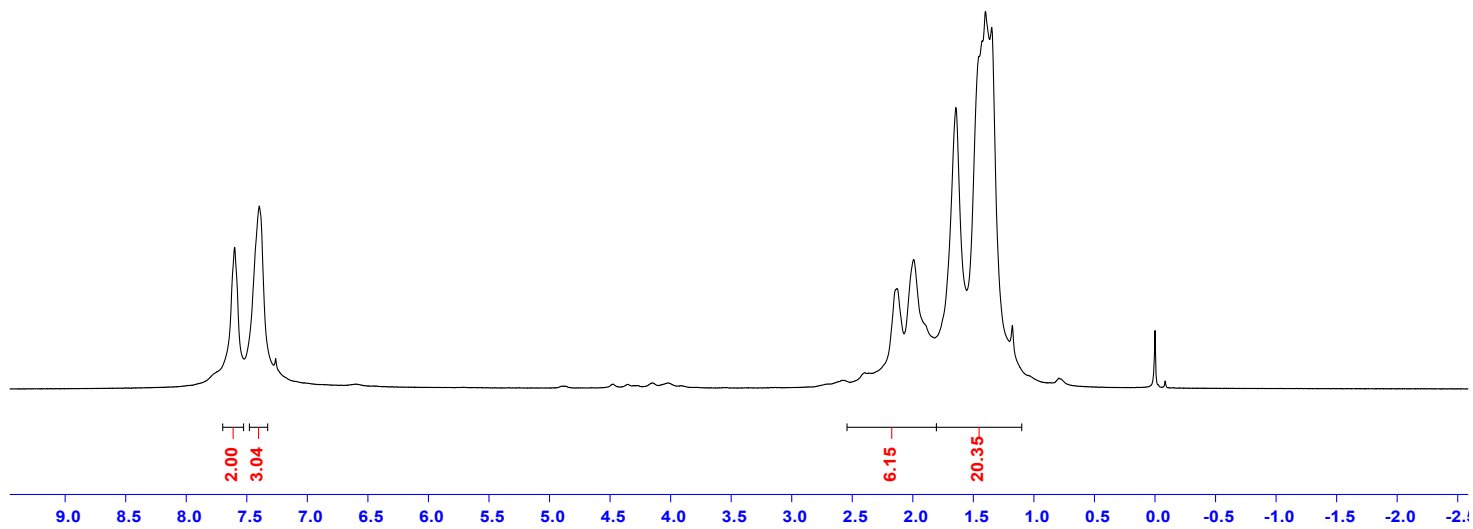

**$^{13}\text{C}$  NMR (101 MHz,  $\text{CDCl}_3$ ) spectra for 6**

lhc-x230824-3.11.fid —  $^1\text{H}$  NMR (400 MHz,  $\text{CDCl}_3$ )

131.39  
131.32  
130.83  
129.97  
128.36  
128.26

36.13  
35.49  
28.22  
28.11  
28.08  
28.01  
27.88  
27.75  
27.31  
26.10

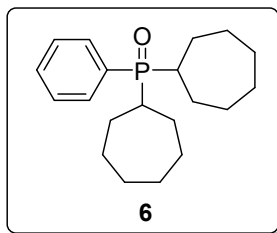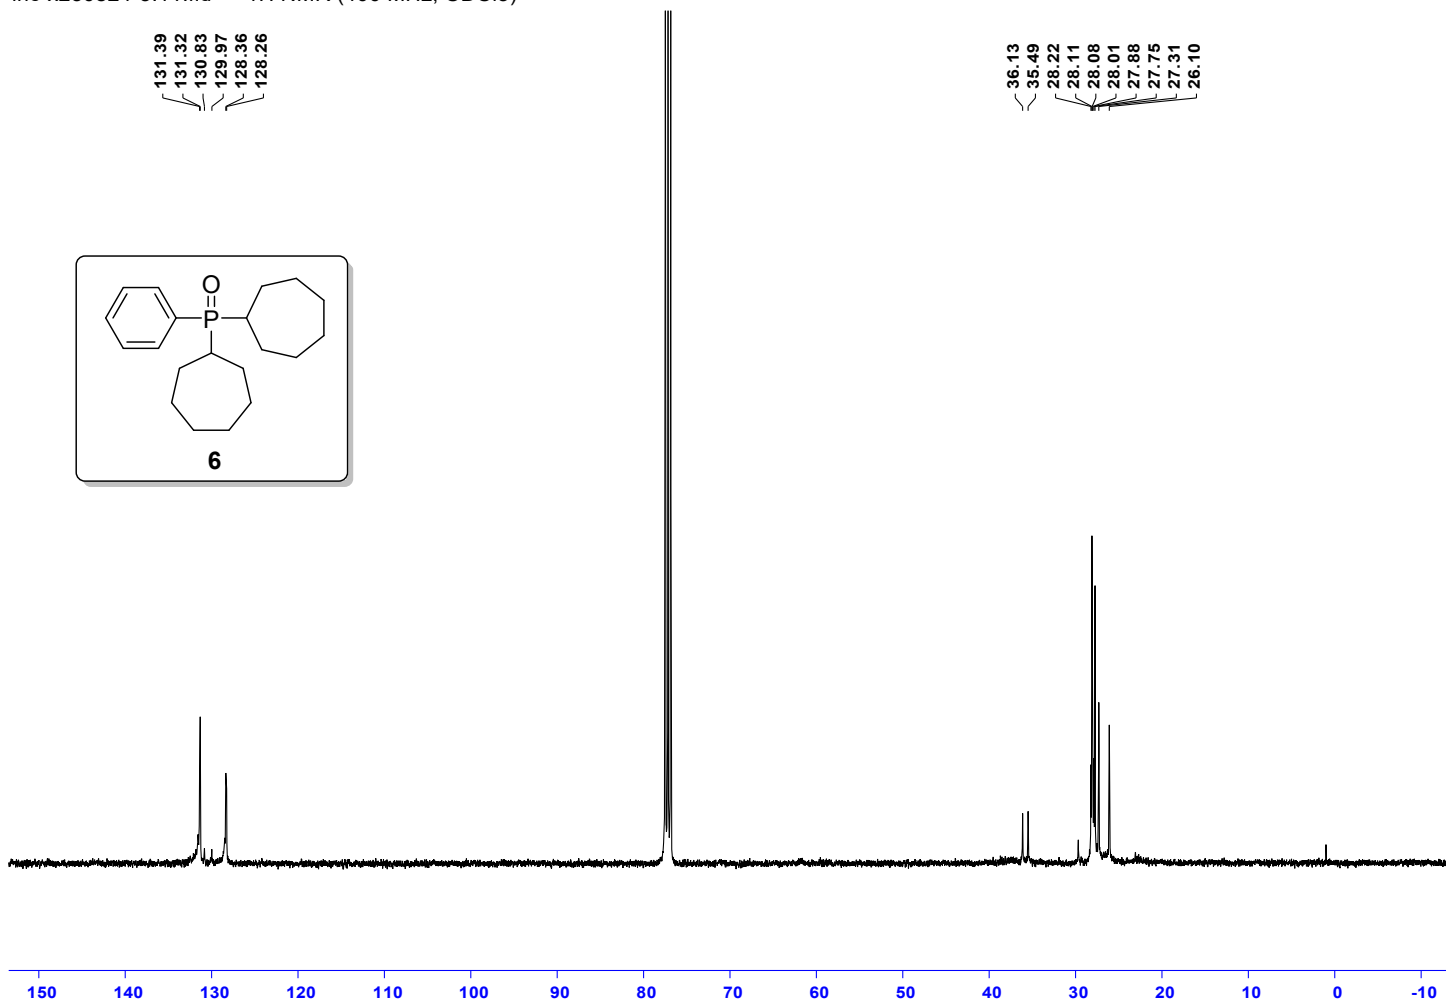

**$^{31}\text{P}$  NMR (162 MHz,  $\text{CDCl}_3$ ) spectra for 6**

lhc-x22x24-3-c7.2.fid —  $^1\text{H}$  NMR (400 MHz,  $\text{CDCl}_3$ )

— 52.74

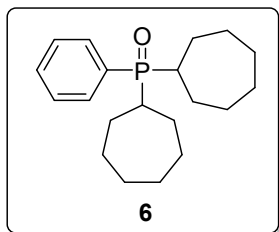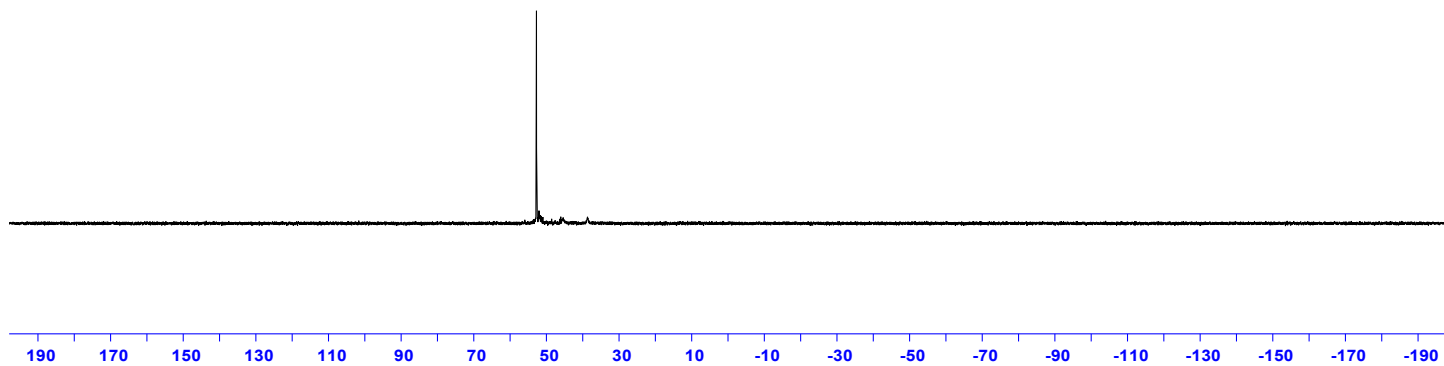

**<sup>1</sup>H NMR (400 MHz, CDCl<sub>3</sub>) spectra for 7**

lhc-x22x24-5-c8.1.fid — 1H NMR (400 MHz, CDCl<sub>3</sub>)

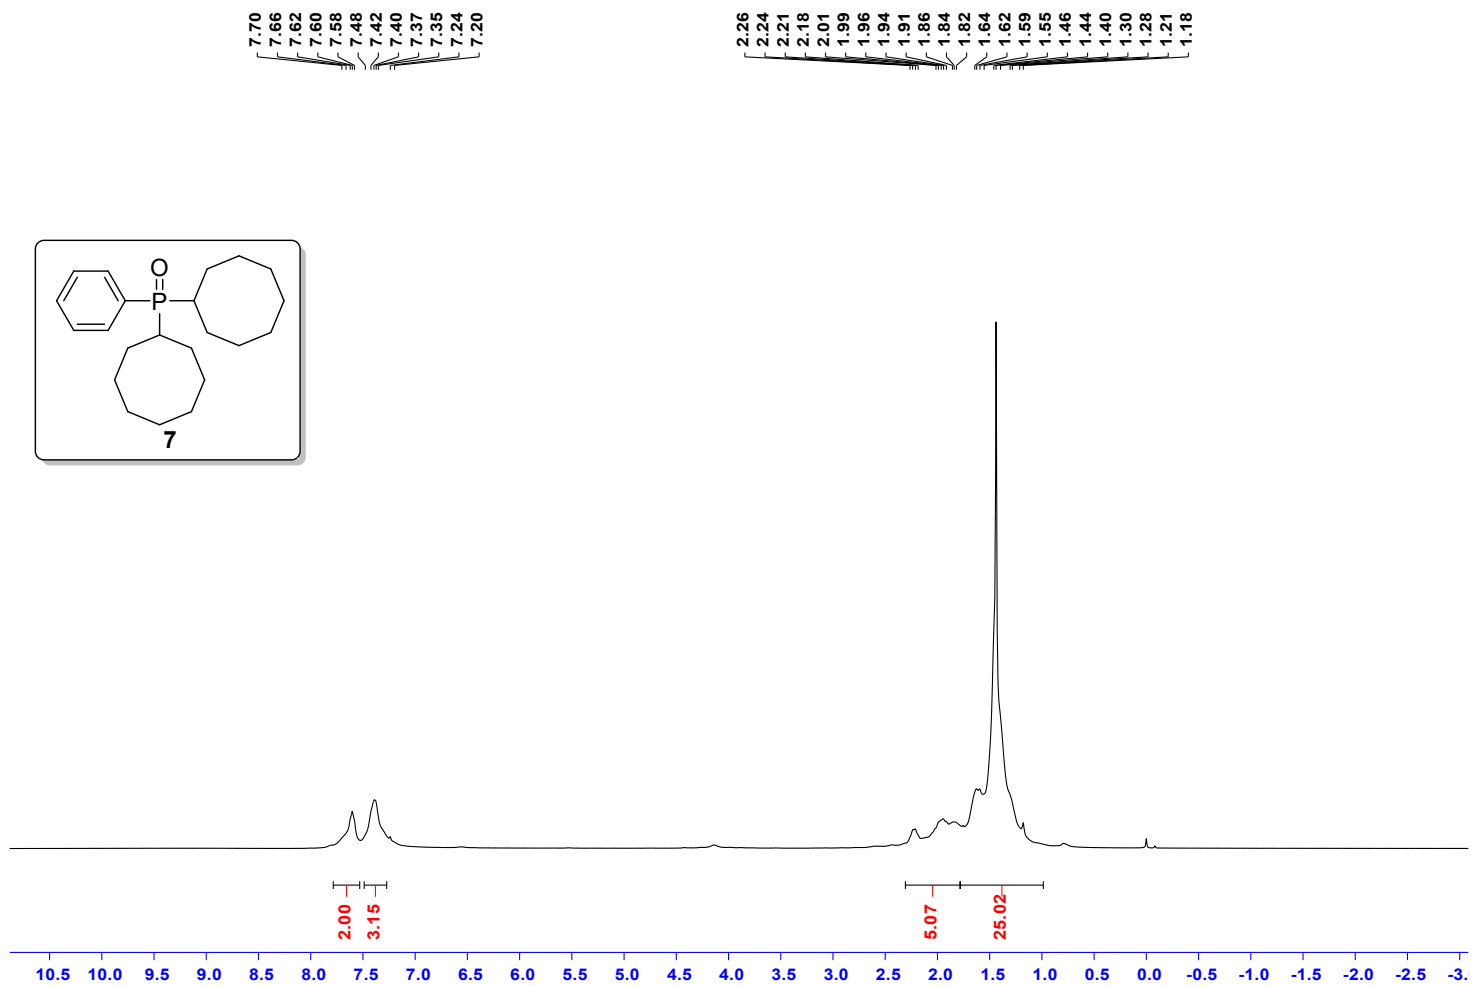



**<sup>13</sup>C NMR (101 MHz, CDCl<sub>3</sub>) spectra for 7**

lhc-x230824-4.11.fid — 1H NMR (400 MHz, CDCl<sub>3</sub>)

131.54  
131.46  
131.25  
131.22  
130.43  
128.71  
128.30  
128.20

33.77  
33.14  
29.71  
26.97  
26.86  
26.74  
26.46  
26.18  
26.09  
25.86  
25.74  
25.72  
25.66

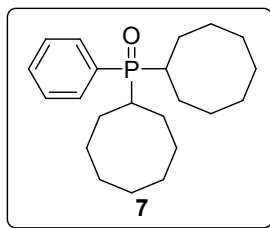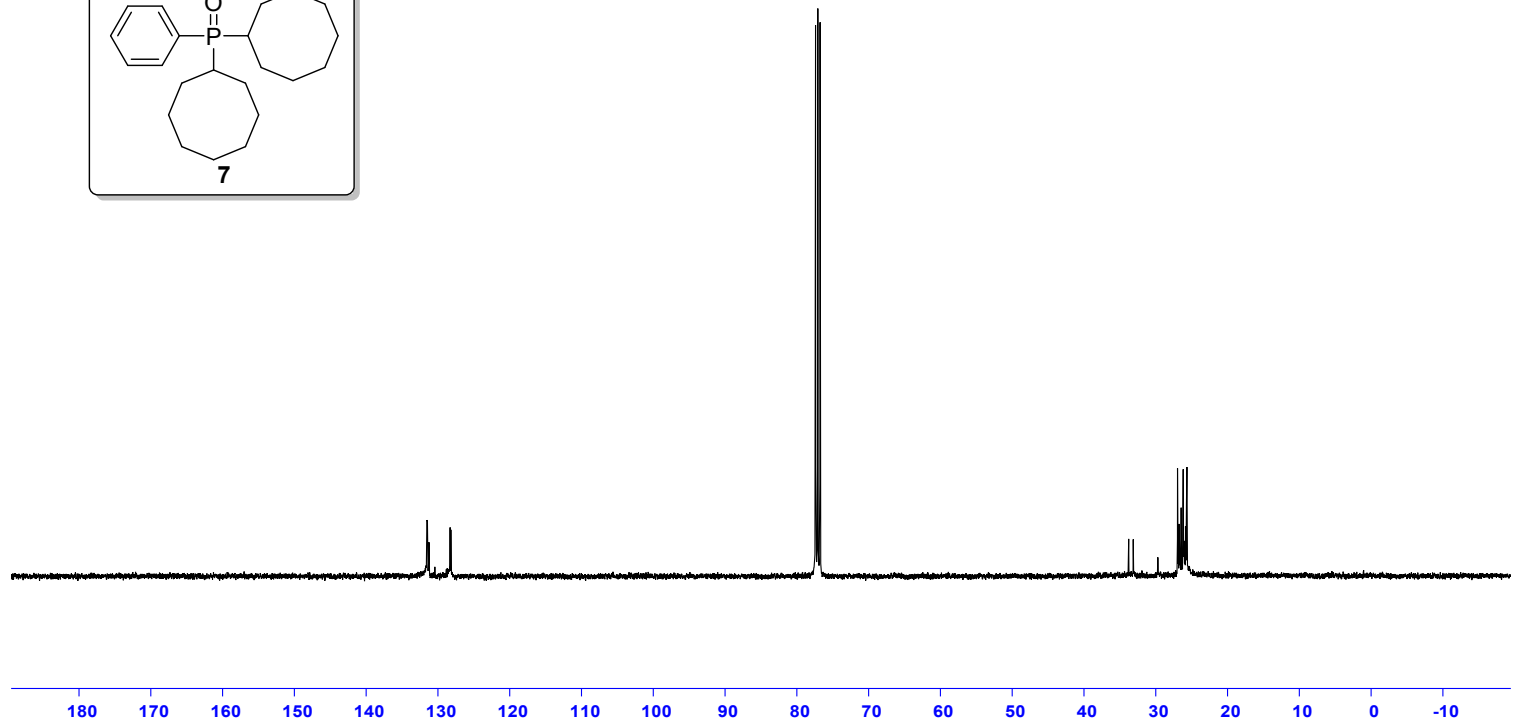

**$^{31}\text{P}$  NMR (162 MHz,  $\text{CDCl}_3$ ) spectra for 7**

lhc-x22x24-5-c8.2.fid —  $^1\text{H}$  NMR (400 MHz,  $\text{CDCl}_3$ )

— 54.51

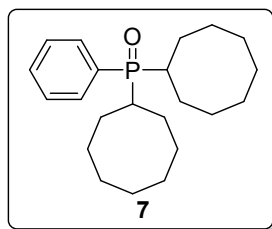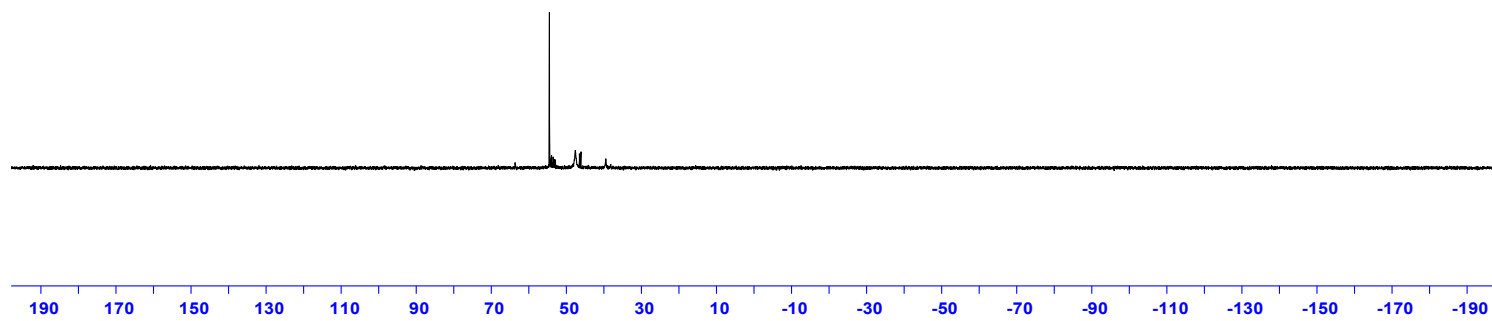

<sup>1</sup>H NMR (500 MHz, CDCl<sub>3</sub>) spectra for **8**

lhc-x230818-1.4.fid — 1H NMR (400 MHz, CDCl<sub>3</sub>)

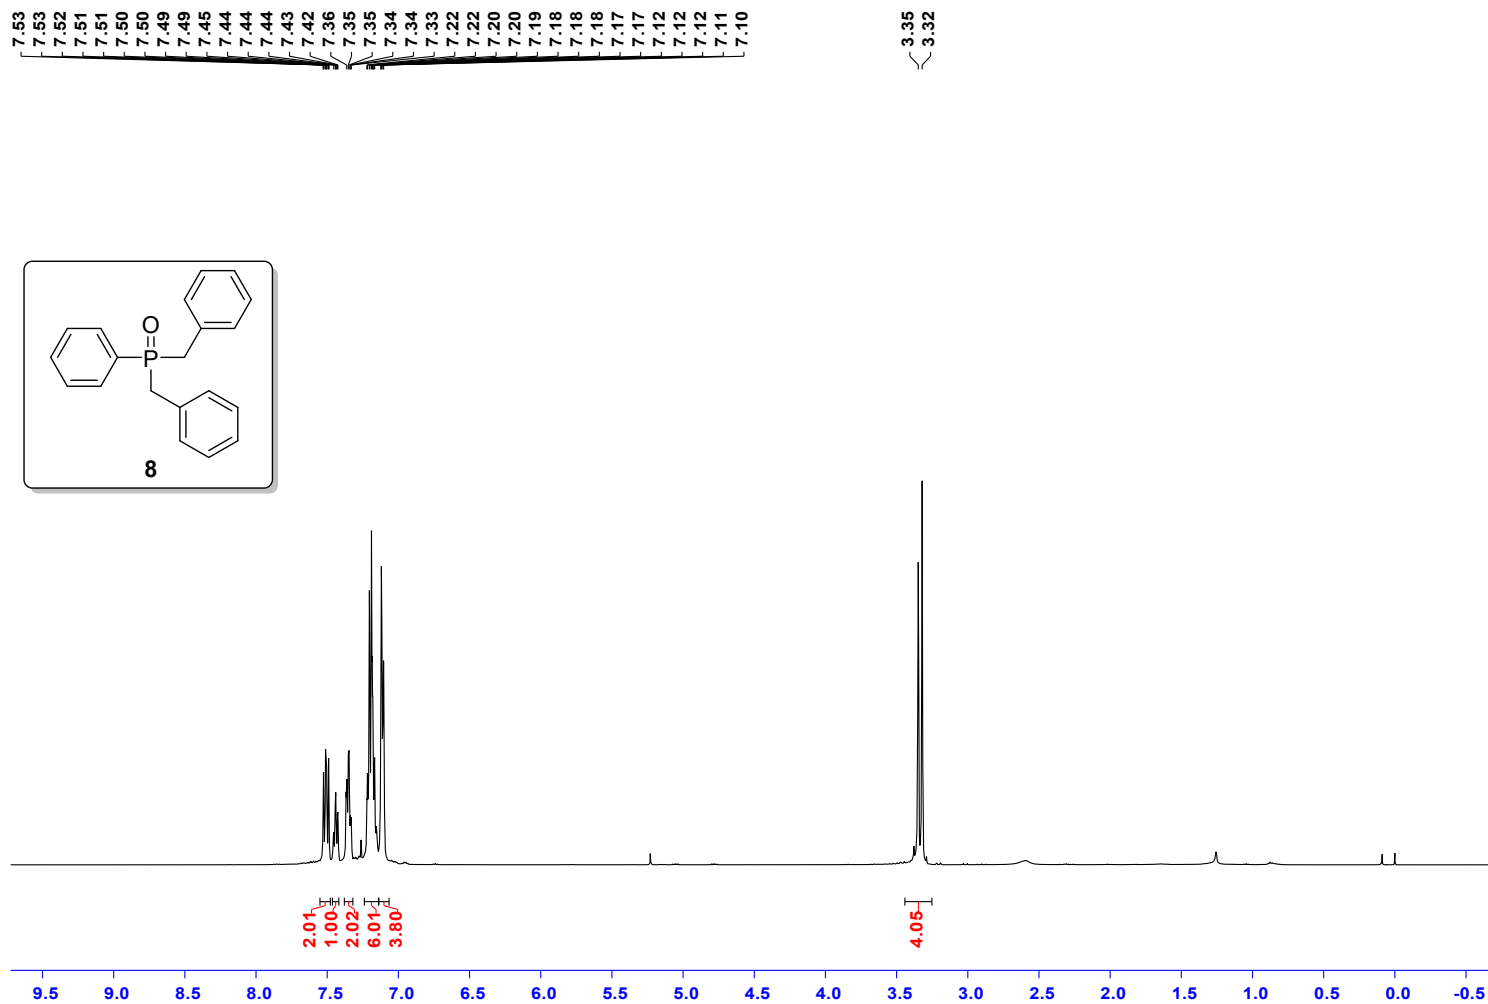

**$^{13}\text{C}$  NMR (126 MHz,  $\text{CDCl}_3$ ) spectra for 8**

lhc-x230818-1.5.fid —  $^1\text{H}$  NMR (400 MHz,  $\text{CDCl}_3$ )

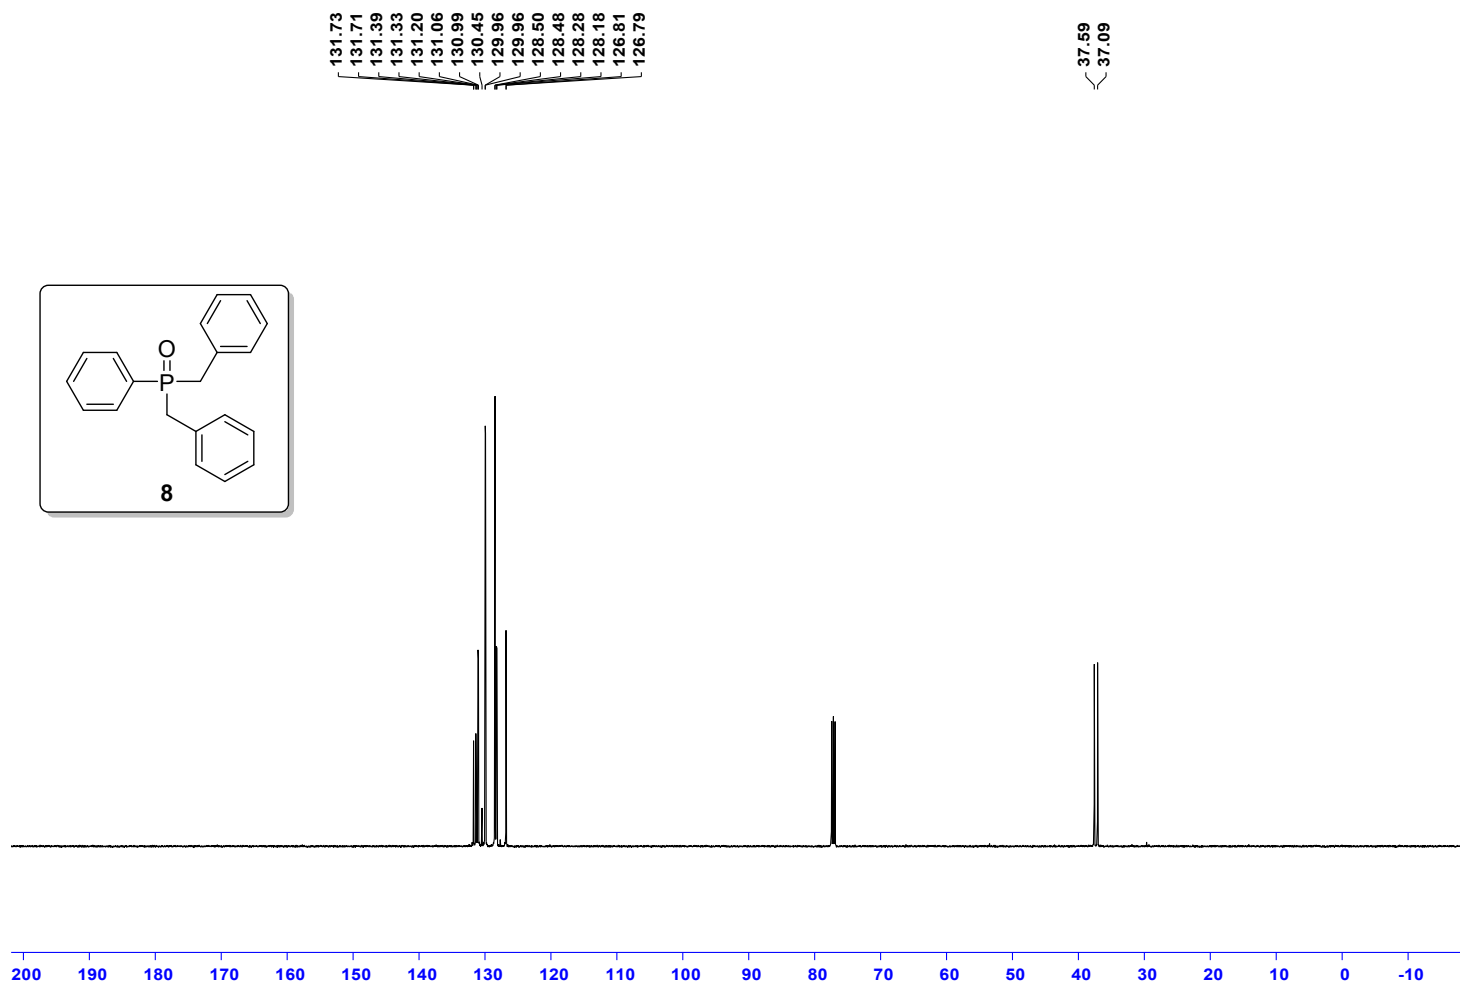

**$^{31}\text{P}$  NMR (202 MHz,  $\text{CDCl}_3$ ) spectra for 8**

lhc-x230818-1.6.fid —  $^1\text{H}$  NMR (400 MHz,  $\text{CDCl}_3$ )

— 35.14

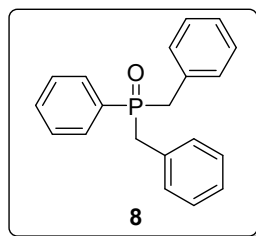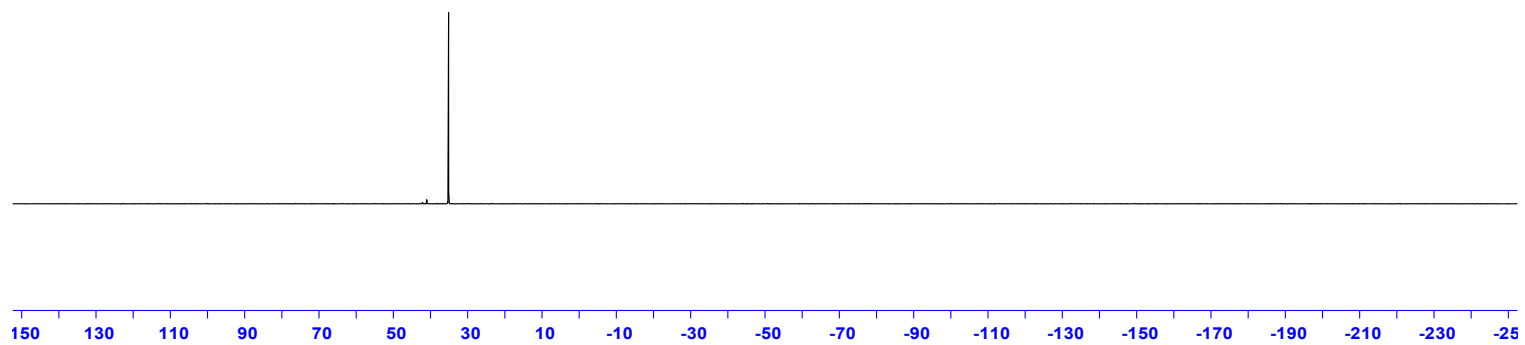

**<sup>1</sup>H NMR (400 MHz, CDCl<sub>3</sub>) spectra for 9**

lhc-x230822-1.10.fid — <sup>1</sup>H NMR (400 MHz, CDCl<sub>3</sub>)

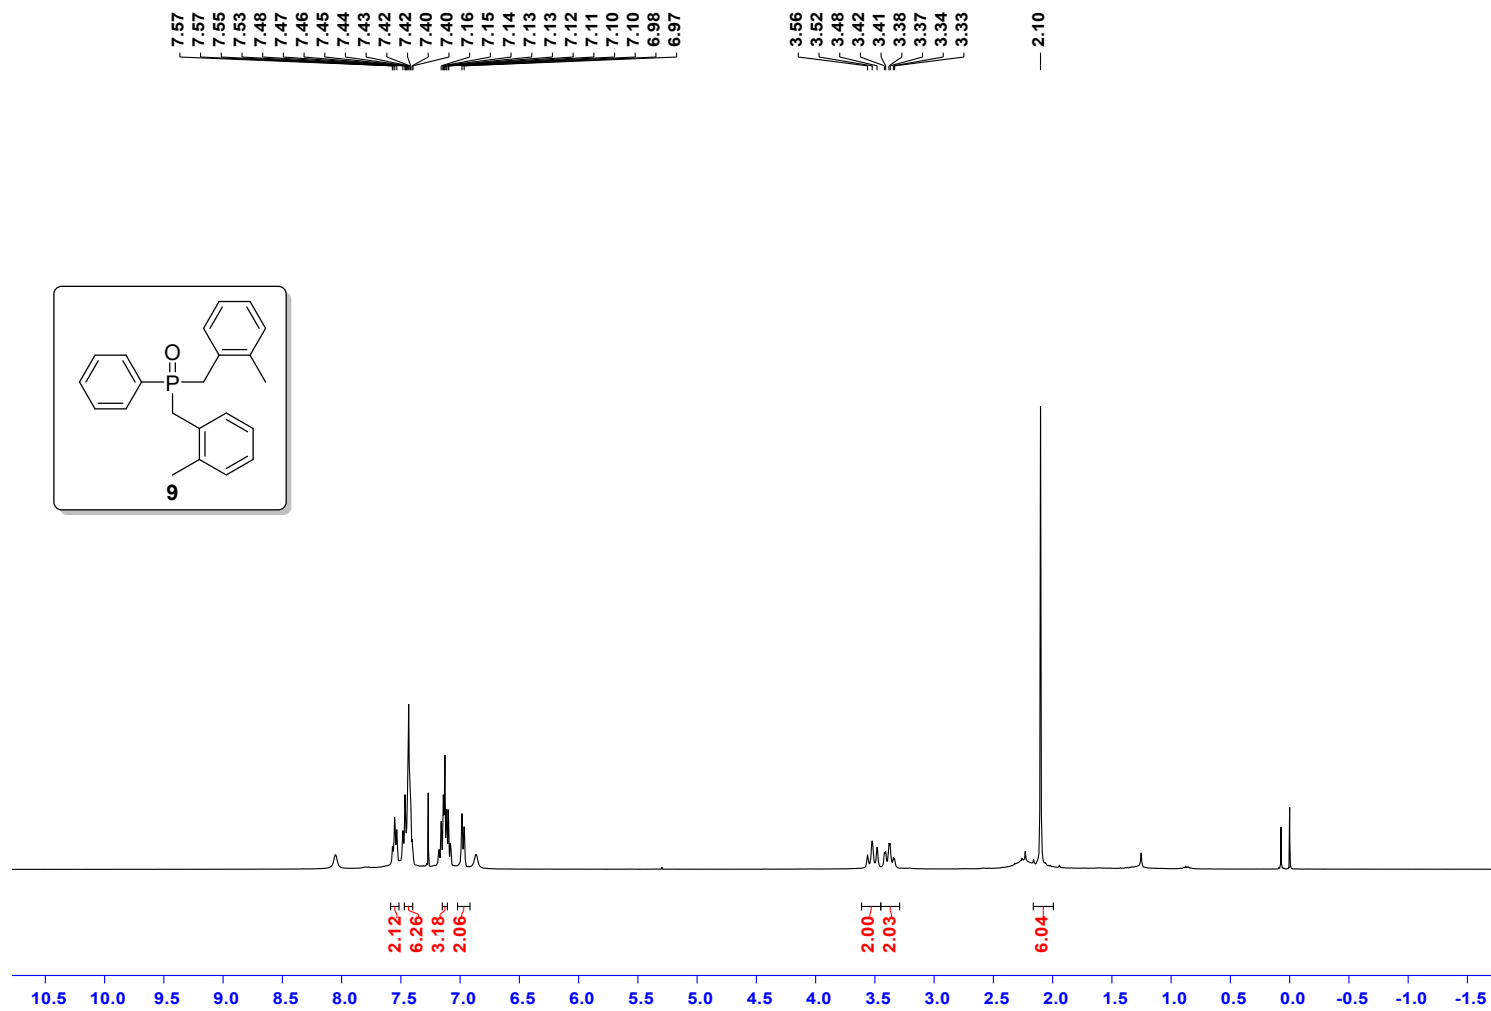

<sup>13</sup>C NMR (101 MHz, CDCl<sub>3</sub>) spectra for 9

lhc-x230822-1.11.fid — 1H NMR (400 MHz, CDCl<sub>3</sub>)

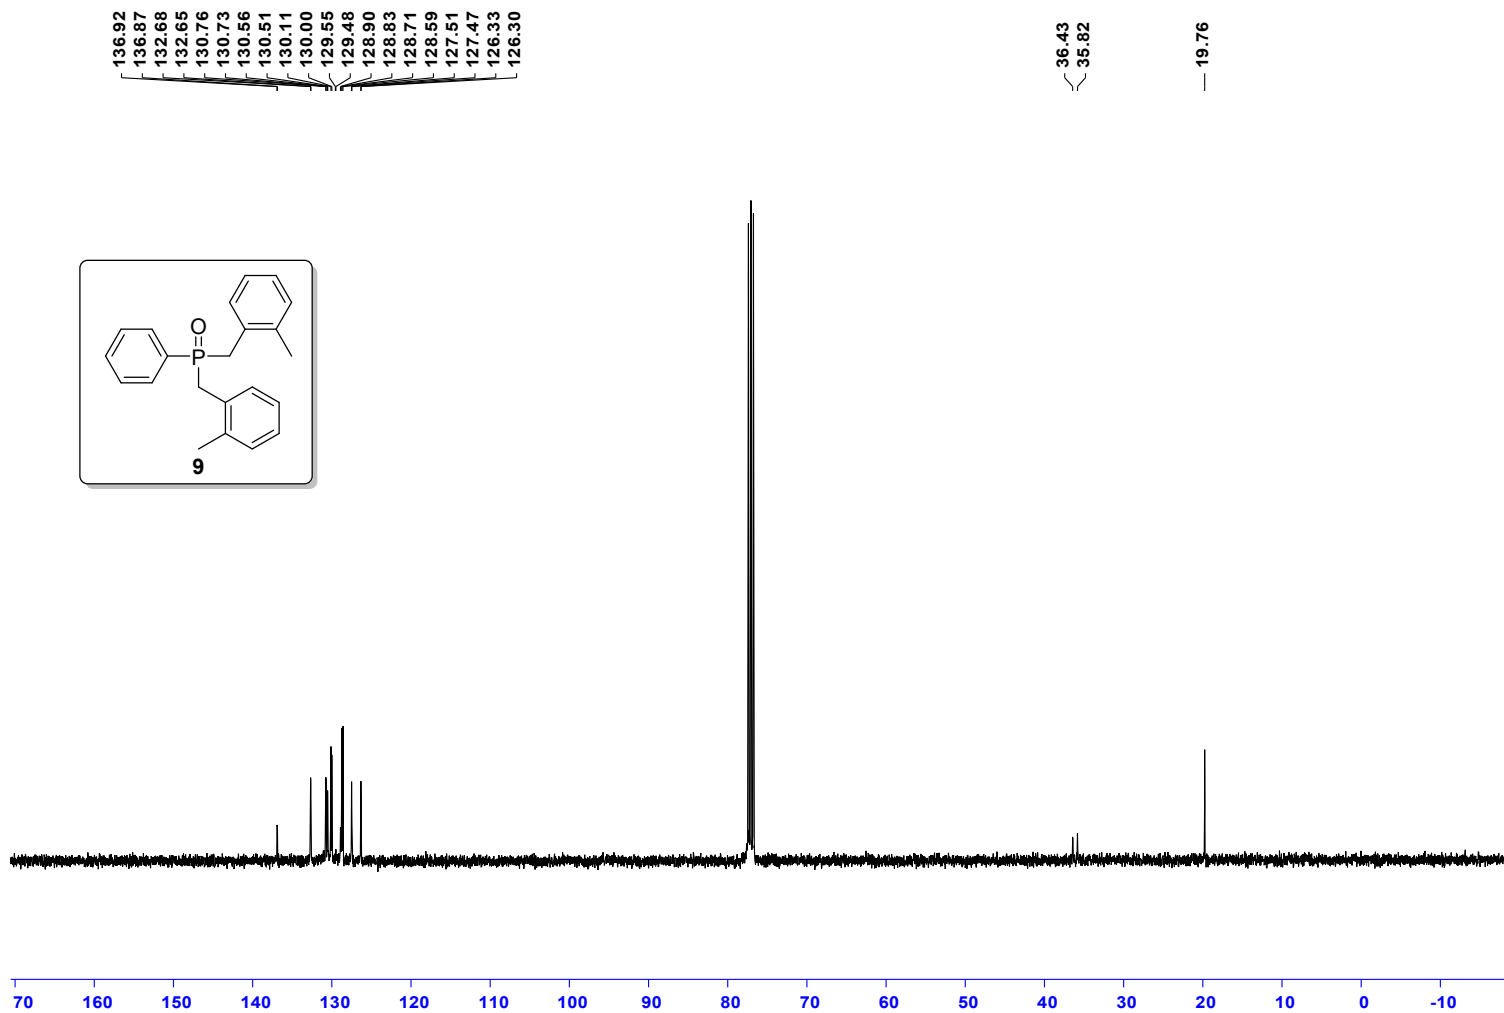

**<sup>31</sup>P NMR (162 MHz, CDCl<sub>3</sub>) spectra for 9**

lhc-x230822-1.12.fid — 1H NMR (400 MHz, CDCl<sub>3</sub>)

— 28.89

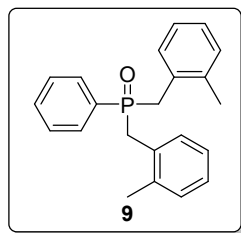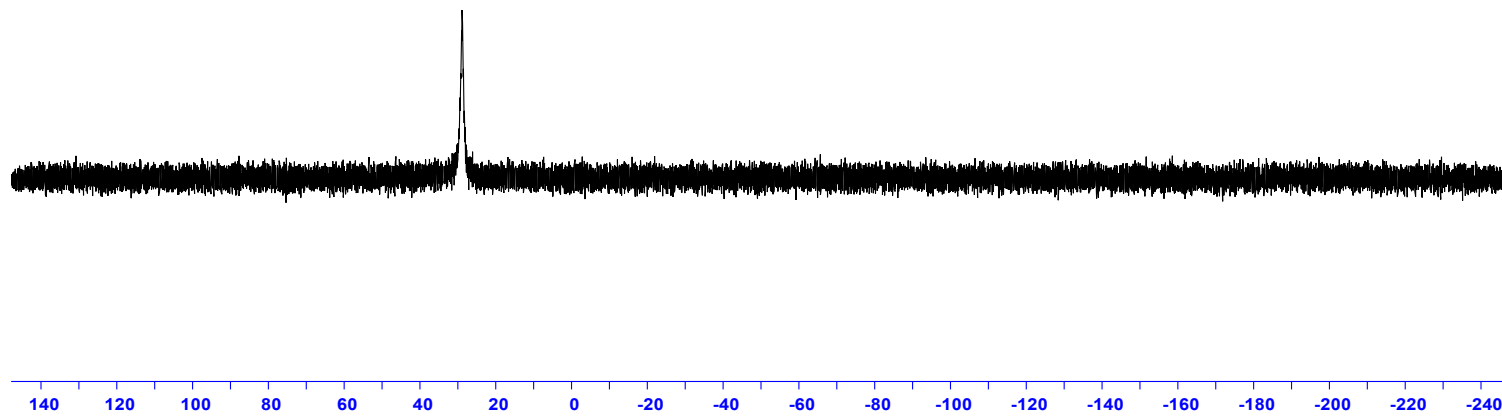



**<sup>1</sup>H NMR (500 MHz, CDCl<sub>3</sub>) spectra for 10**

lhc-x230812-1.1.fid — 1H NMR (400 MHz, CDCl<sub>3</sub>)

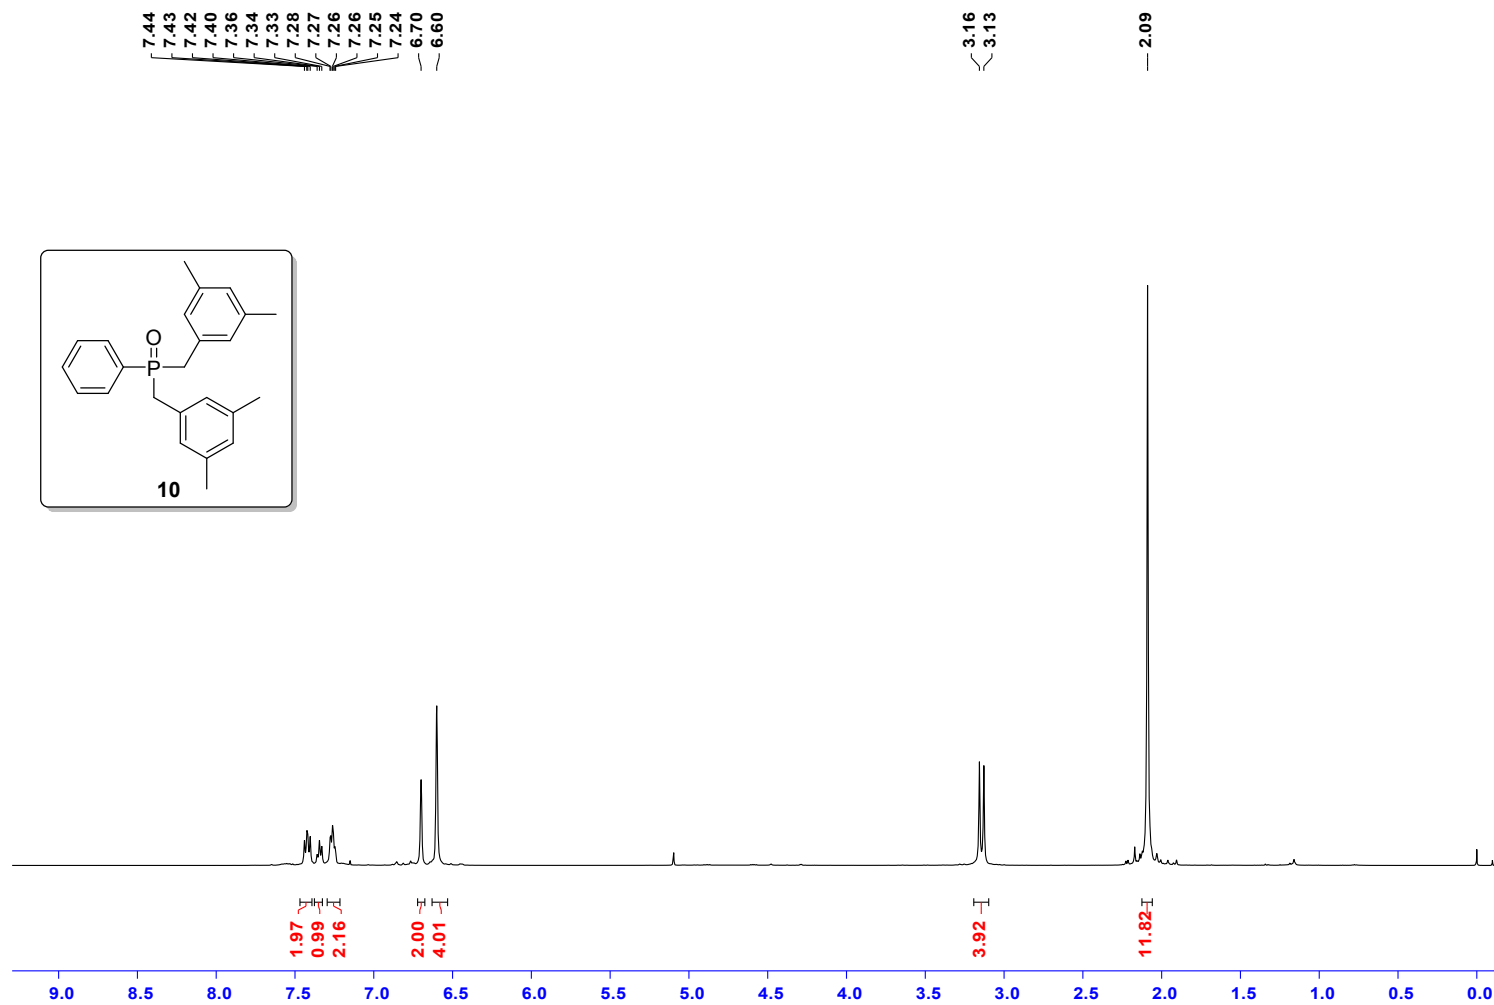

**<sup>13</sup>C NMR (126 MHz, CDCl<sub>3</sub>) spectra for 10**

lhc-x230812-1.2.fid — 1H NMR (400 MHz, CDCl<sub>3</sub>)

137.88  
137.86  
131.69  
131.67  
131.29  
131.22  
131.15  
128.53  
128.51  
128.17  
128.08  
127.97  
127.93

37.36  
36.85

21.24

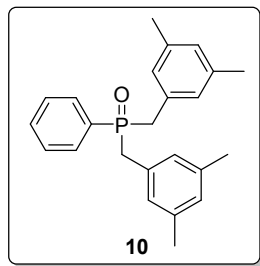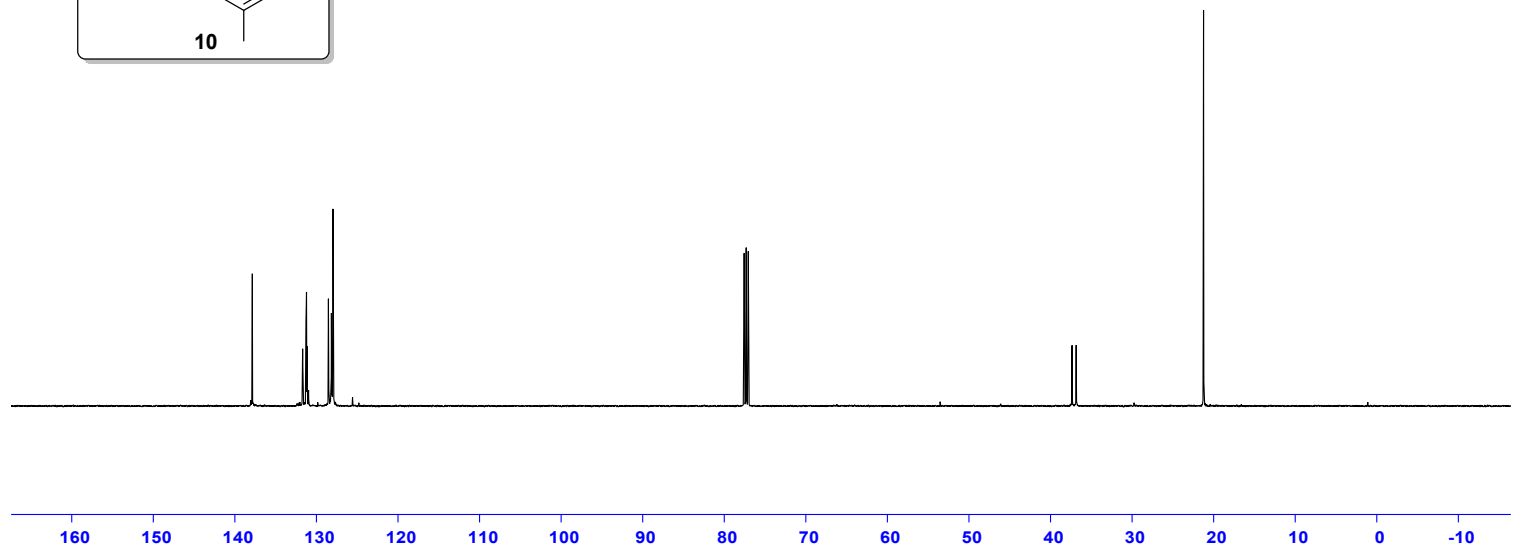

**<sup>31</sup>P NMR (202 MHz, CDCl<sub>3</sub>) spectra for 10**

lhc-x230812-1.3.fid — 1H NMR (400 MHz, CDCl<sub>3</sub>)

— 35.56

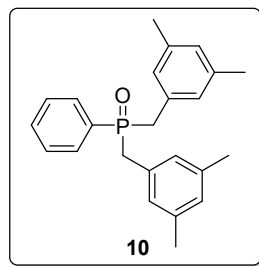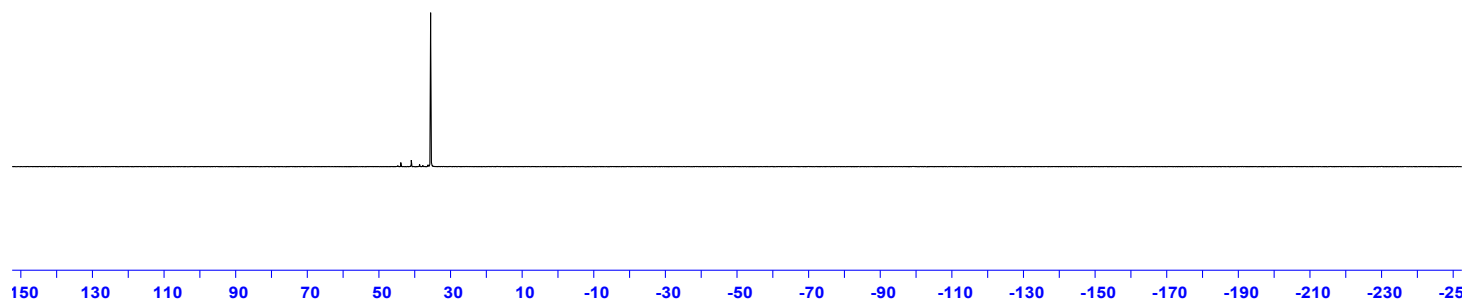

**<sup>1</sup>H NMR (500 MHz, CDCl<sub>3</sub>) spectra for 11**

lhc-x230822-4.4.fid — 1H NMR (400 MHz, CDCl<sub>3</sub>)

7.58  
7.56  
7.55  
7.54  
7.47  
7.46  
7.45  
7.44  
7.43  
7.37  
7.36  
7.35  
7.22  
7.22  
7.21  
7.21  
7.20  
7.20  
7.19  
7.19  
7.18  
7.17  
7.17  
7.16  
7.15  
7.15  
7.14  
7.14  
7.13  
7.13  
7.12  
3.68  
3.67  
3.65  
3.65  
3.64  
3.62  
3.62  
3.61  
3.59  
3.58  
3.57  
3.55  
3.54  
3.52  
3.51

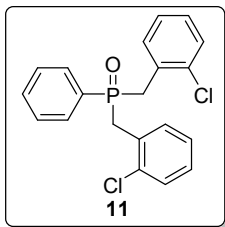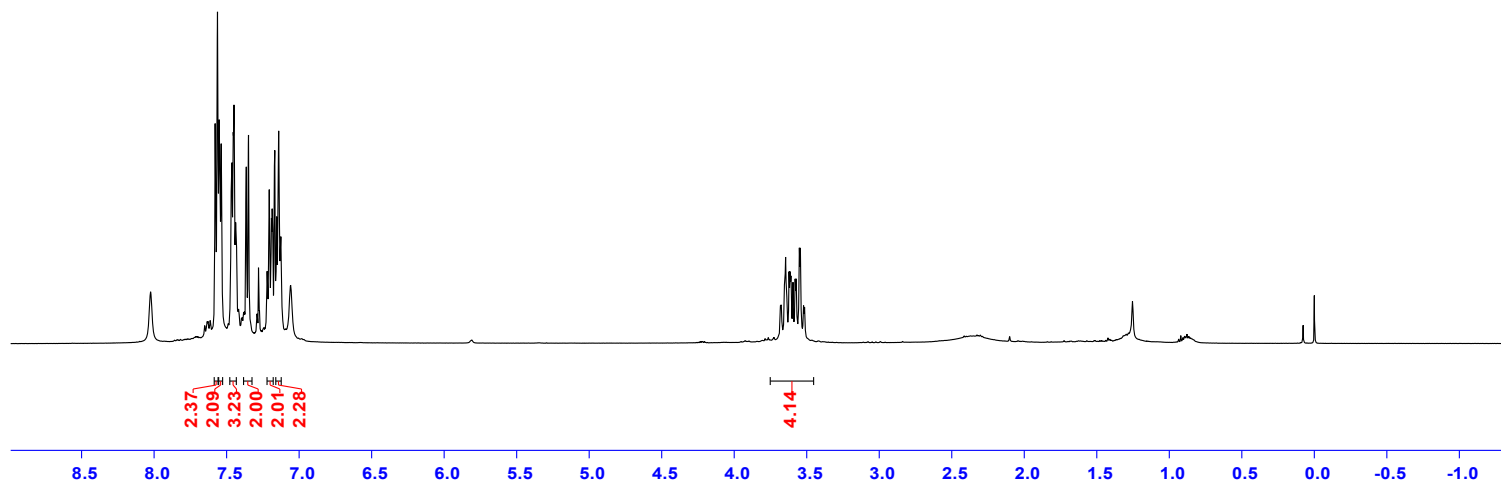

**<sup>13</sup>C NMR (126 MHz, CDCl<sub>3</sub>) spectra for 11**

lhc-x230822-4.5.fid — 1H NMR (400 MHz, CDCl<sub>3</sub>)

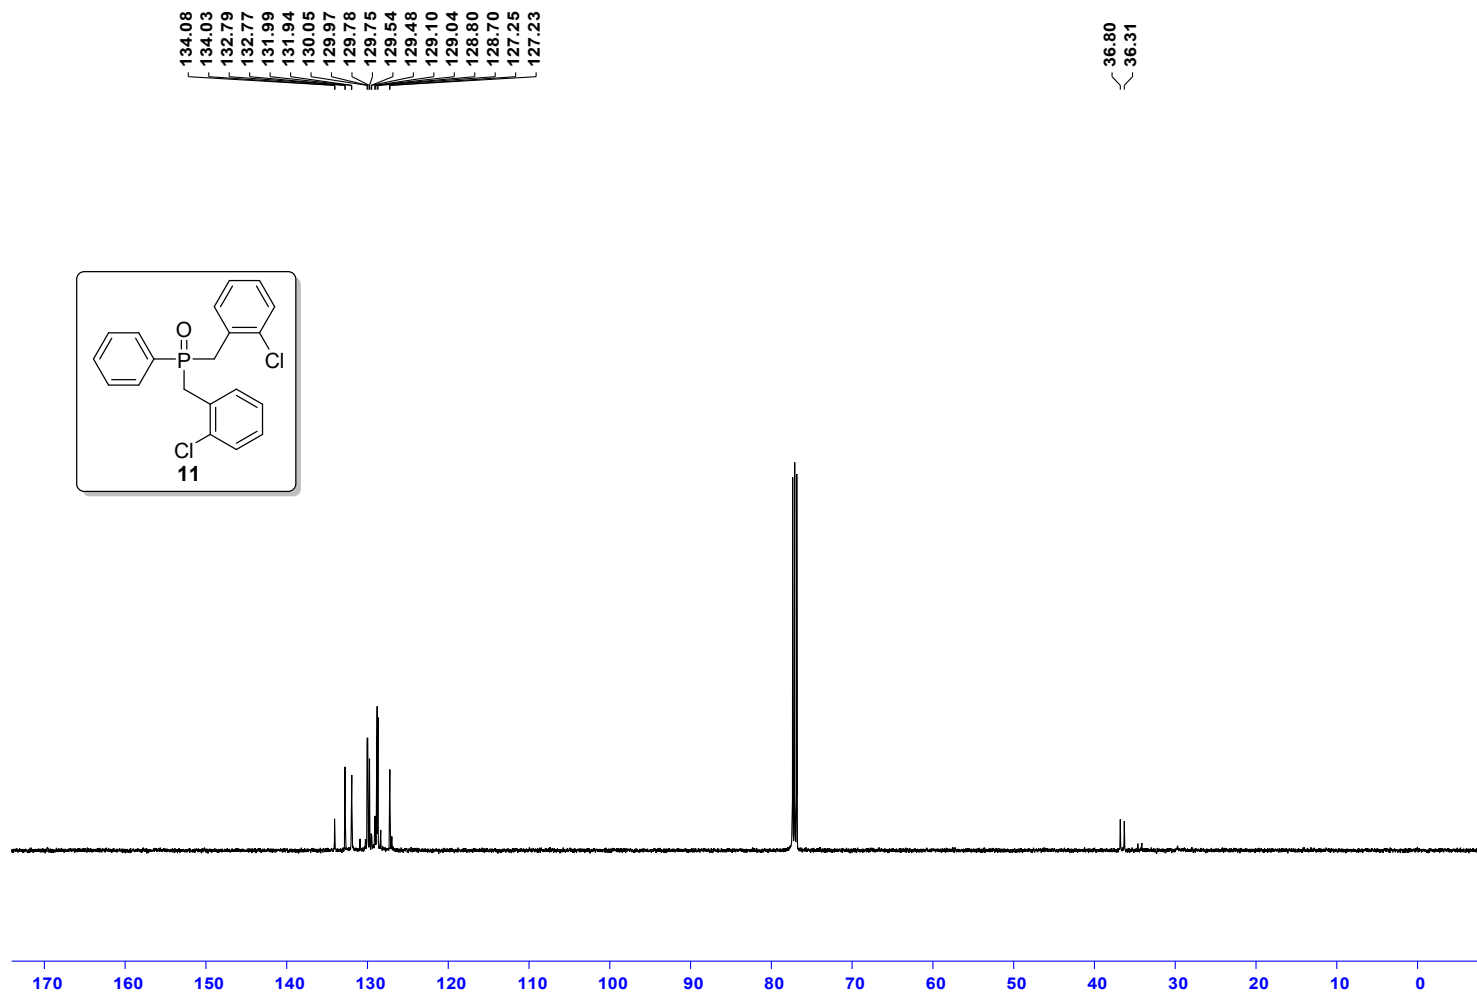

**<sup>31</sup>P NMR (202 MHz, CDCl<sub>3</sub>) spectra for 11**

lhc-x230822-4.6.fid — 1H NMR (400 MHz, CDCl<sub>3</sub>)

— 25.56

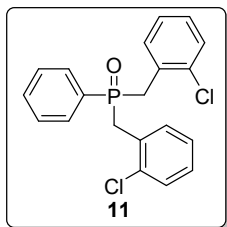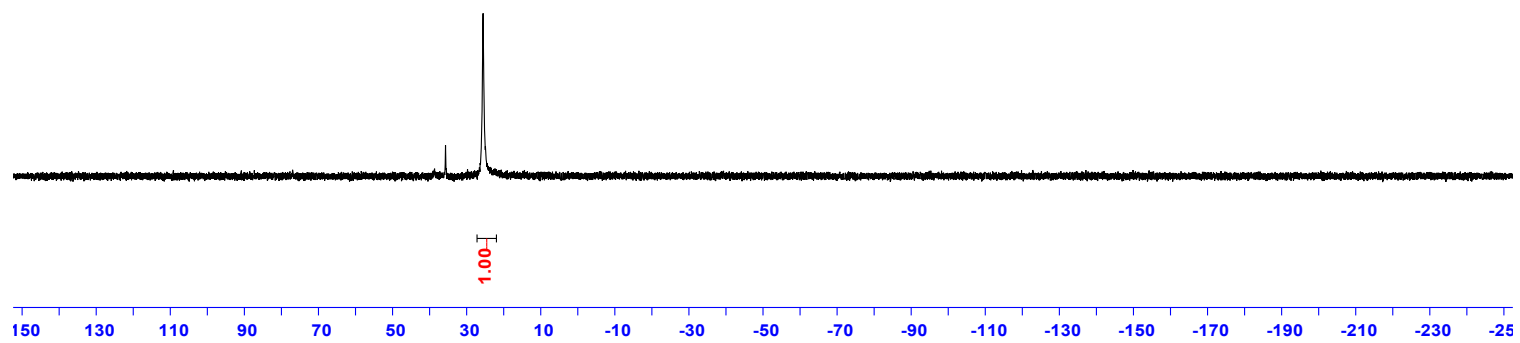

# <sup>1</sup>H NMR (400 MHz, CDCl<sub>3</sub>) spectra for 12

lhc-x230820-4.1.fid — 1H NMR (400 MHz, CDCl<sub>3</sub>)

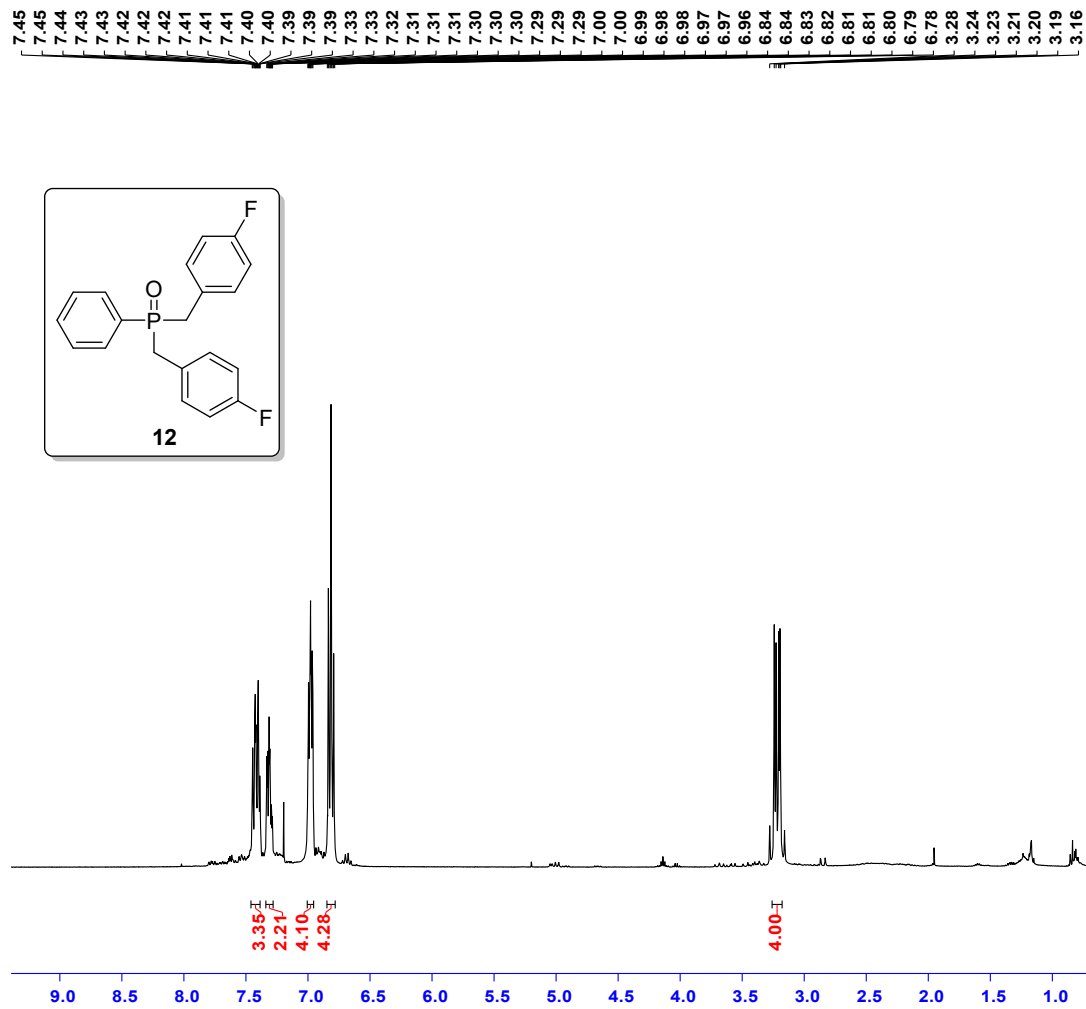

**<sup>13</sup>C NMR (101 MHz, CDCl<sub>3</sub>) spectra for 12**

lhc-x230820-4.2.fid — 1H NMR (400 MHz, CDCl<sub>3</sub>)

163.15  
163.12  
160.71  
160.67  
132.03  
132.00  
131.44  
131.39  
131.36  
131.31  
130.96  
130.88  
128.54  
128.42  
126.92  
126.89  
126.84  
126.81  
115.60  
115.57  
115.39  
115.36

36.78  
36.14

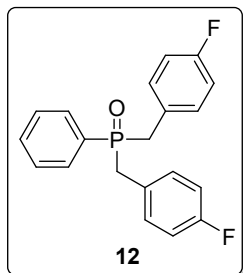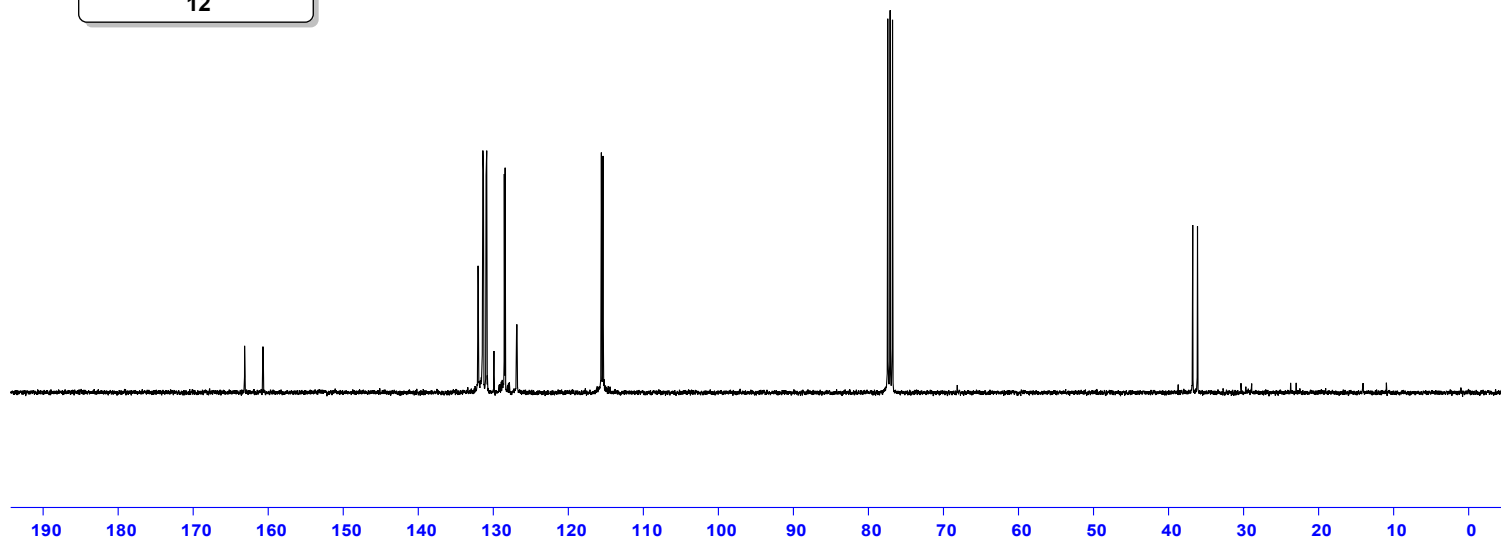



**<sup>31</sup>P NMR (162 MHz, CDCl<sub>3</sub>) spectra for 12**

lhc-x230820-4.3.fid — 1H NMR (400 MHz, CDCl<sub>3</sub>)

— 34.87

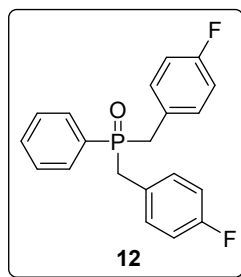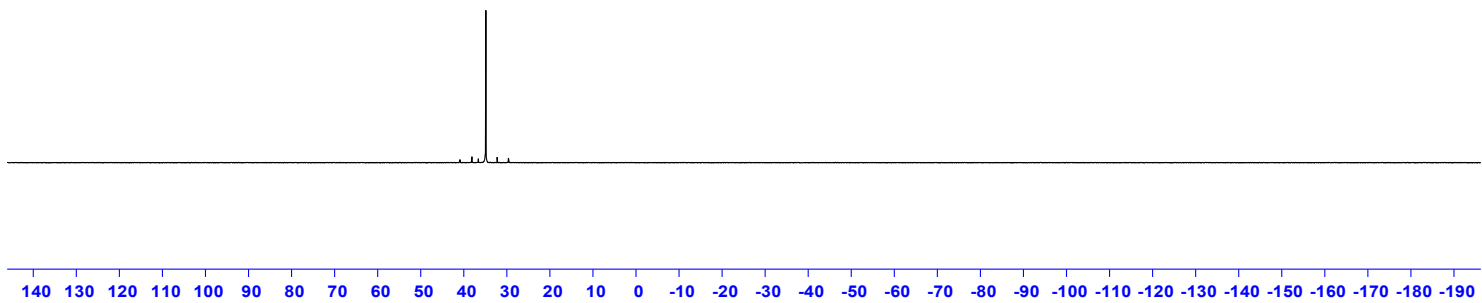

**<sup>19</sup>F NMR (376 MHz, CDCl<sub>3</sub>) spectra for 12**

lhc-x230820-4.4.fid — 1H NMR (400 MHz, CDCl<sub>3</sub>)

-115.60  
-115.61

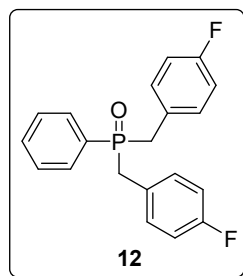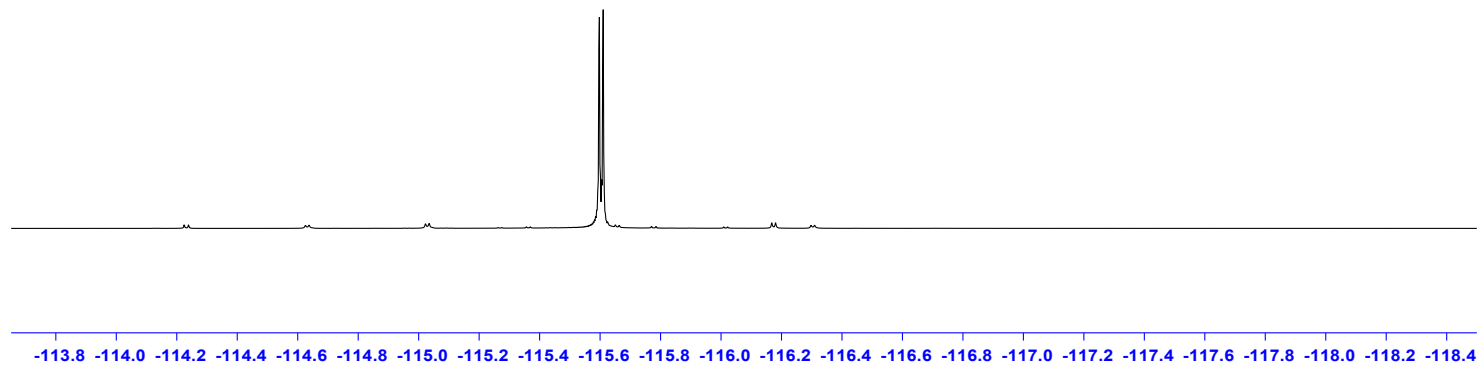

**<sup>1</sup>H NMR (500 MHz, CDCl<sub>3</sub>) spectra for 13**

LHC-X230826-1PhBu.1.fid — 1H NMR (400 MHz, CDCl<sub>3</sub>)

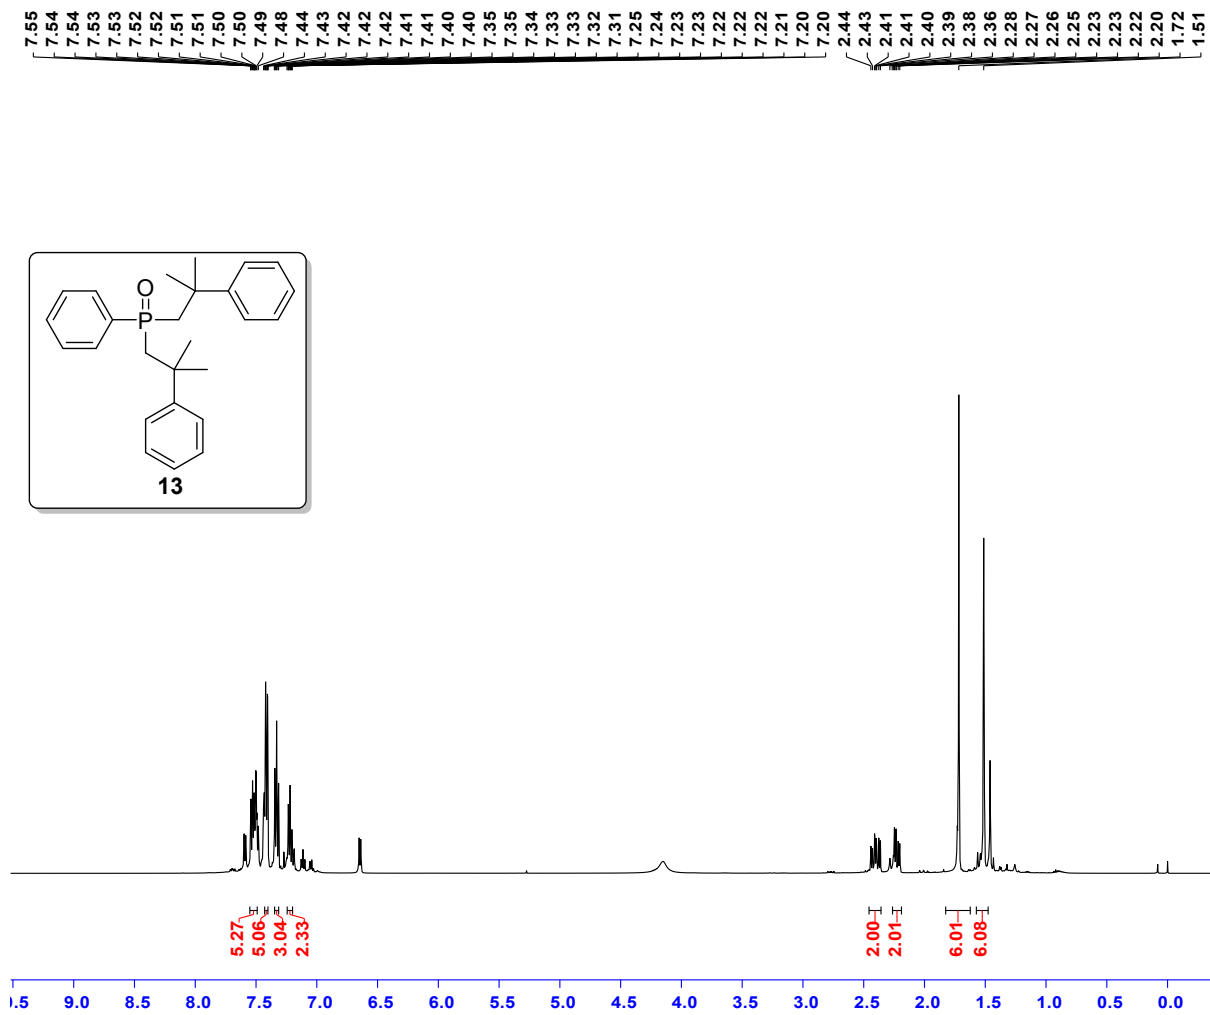

**<sup>13</sup>C NMR (126 MHz, CDCl<sub>3</sub>) spectra for 13**

LHC-X230826-1PhBu.2.fid — 1H NMR (400 MHz, CDCl<sub>3</sub>)

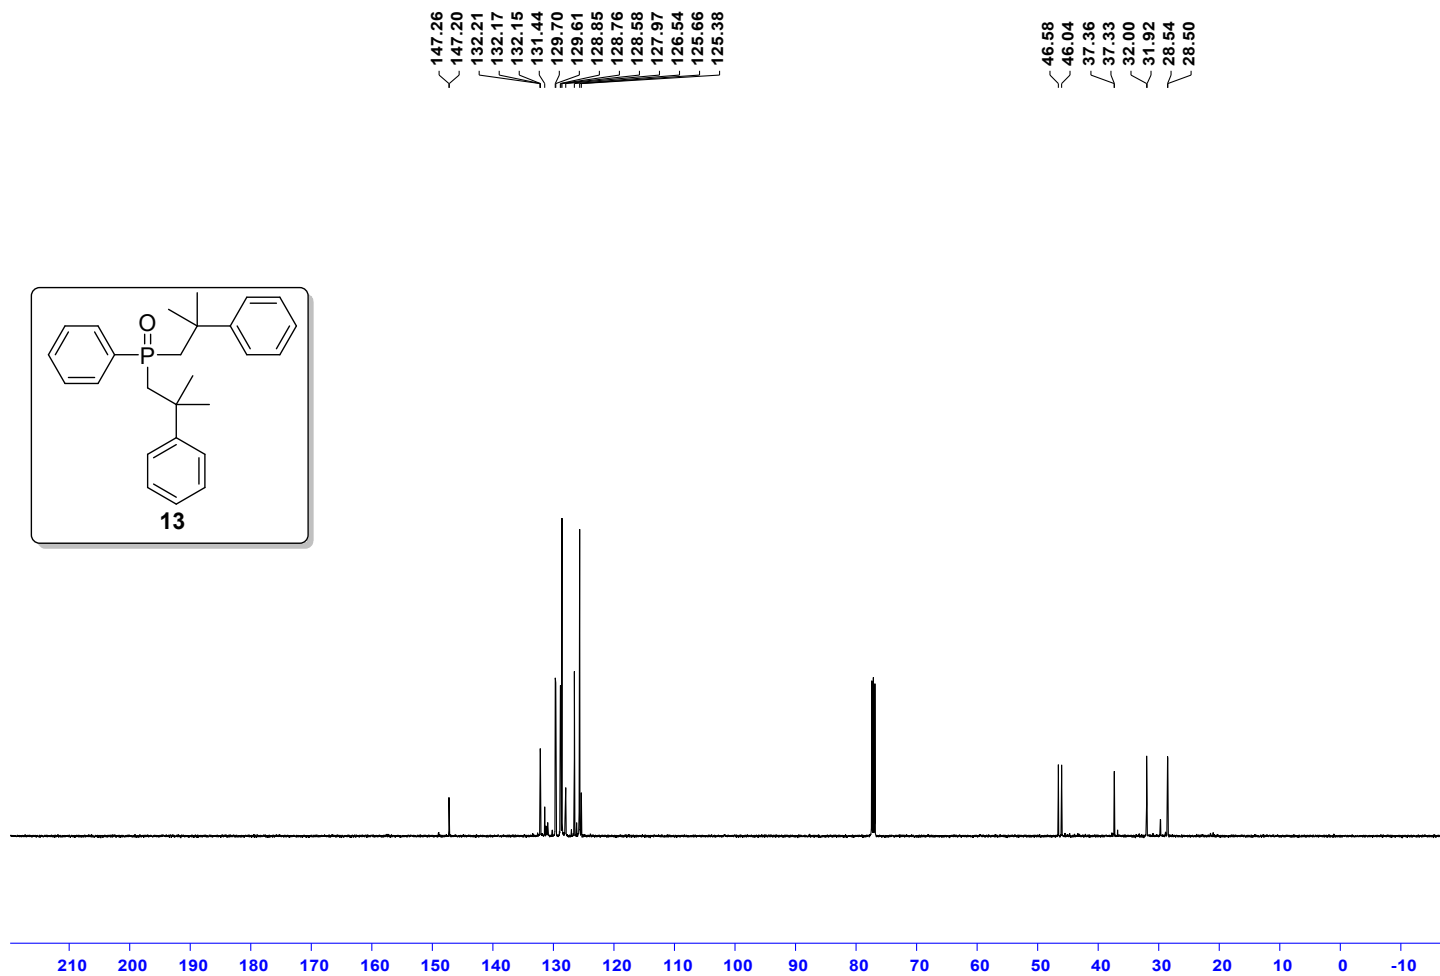

**<sup>31</sup>P NMR (202 MHz, CDCl<sub>3</sub>) spectra for 13**

lhc-x230824-2.12.fid — 1H NMR (400 MHz, CDCl<sub>3</sub>)

— 22.69

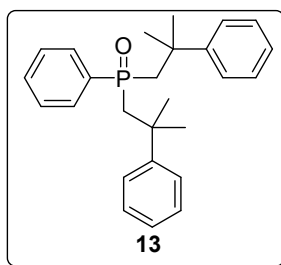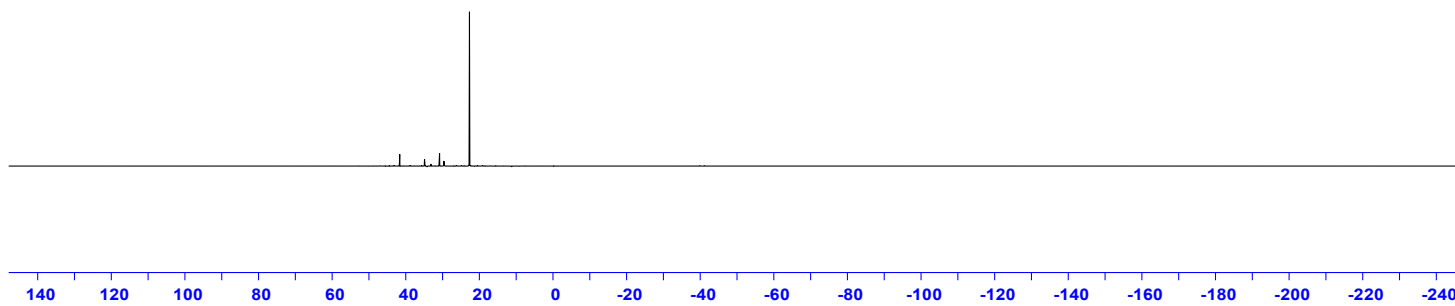

**<sup>1</sup>H NMR (400 MHz, CDCl<sub>3</sub>) spectra for 14**

lhc-x22z11-1hexane.1.fid — <sup>1</sup>H NMR (400 MHz, CDCl<sub>3</sub>)

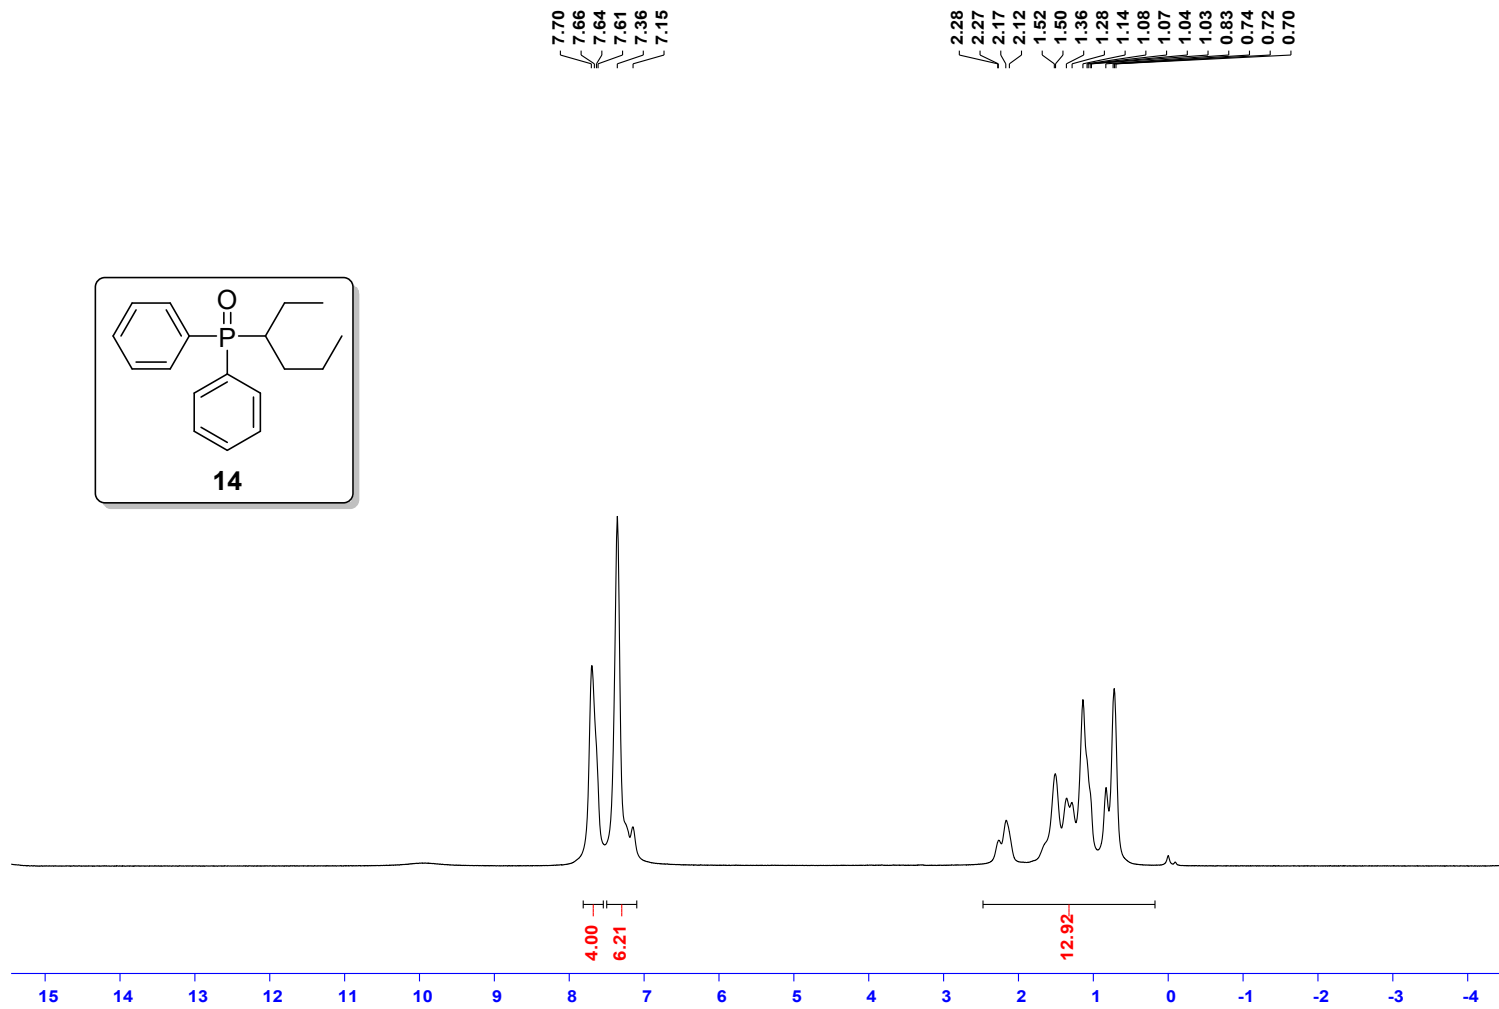

**<sup>13</sup>C NMR (101 MHz, CDCl<sub>3</sub>) spectra for 14**

lhc-x22z11-1hexane.2.fid — 1H NMR (400 MHz, CDCl<sub>3</sub>)

133.23  
133.07  
132.45  
132.25  
132.13  
131.71  
131.49  
131.03  
130.94  
130.91  
130.84  
130.79  
130.70  
128.68  
128.65  
128.62  
128.56  
128.50  
128.03  
127.90

38.56  
37.86  
32.17  
31.45  
31.20  
30.66  
30.51  
29.92  
29.62  
29.49  
29.21  
28.96  
28.32  
22.36  
22.33  
21.32  
21.16  
21.07  
20.51  
14.11  
13.97  
13.85  
12.57  
12.48  
11.93

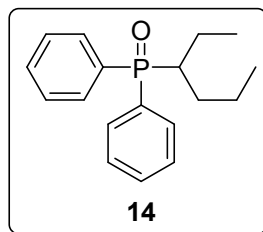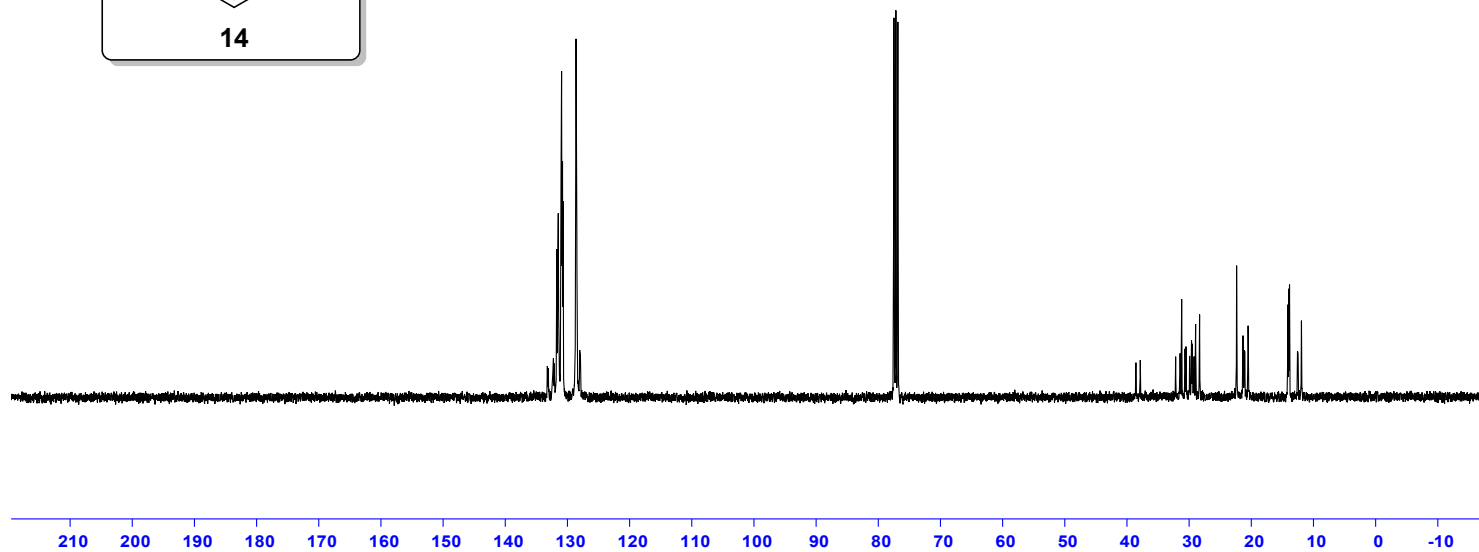

**<sup>31</sup>P NMR (162 MHz, CDCl<sub>3</sub>) spectra for 14**

lhc-x22z11-1hexane.3.fid — 1H NMR (400 MHz, CDCl<sub>3</sub>)

38.16  
37.55  
33.53

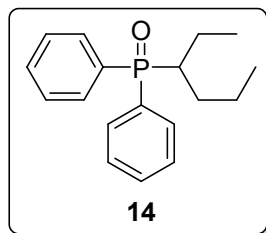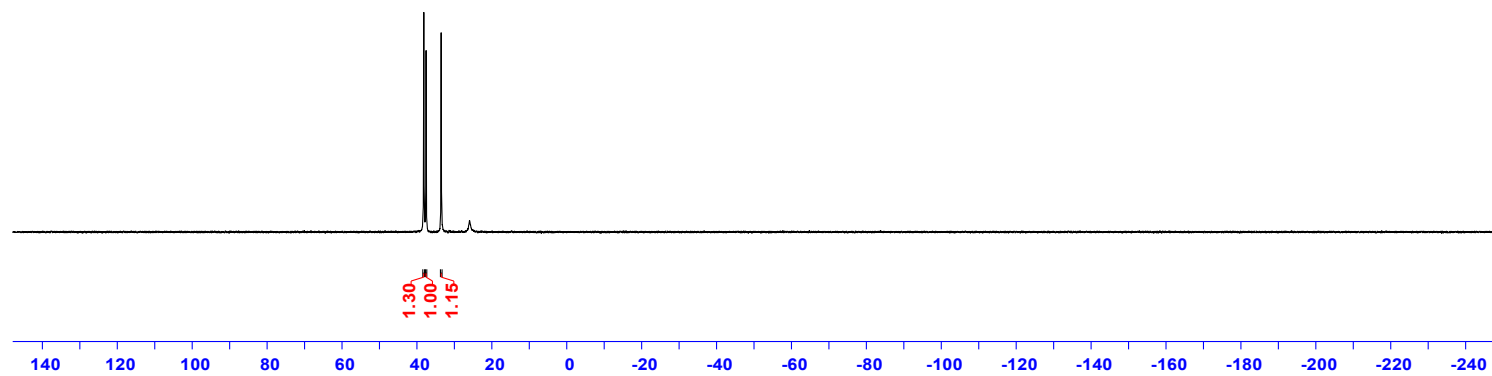



**<sup>1</sup>H NMR (400 MHz, CDCl<sub>3</sub>) spectra for 15**

lhc-x230822-2.10.fid — <sup>1</sup>H NMR (400 MHz, CDCl<sub>3</sub>)

7.779  
7.777  
7.776  
7.775  
7.756  
7.754  
7.752  
7.751  
7.750  
7.749  
7.748  
7.746  
7.728  
7.727  
7.725  
7.720  
7.719  
7.718  
7.716

2.96  
2.95  
2.94  
2.93  
2.92  
2.91  
2.90  
2.62  
2.61  
2.60  
2.58  
2.57  
2.55

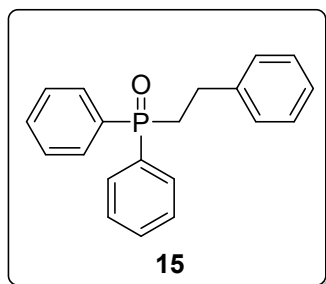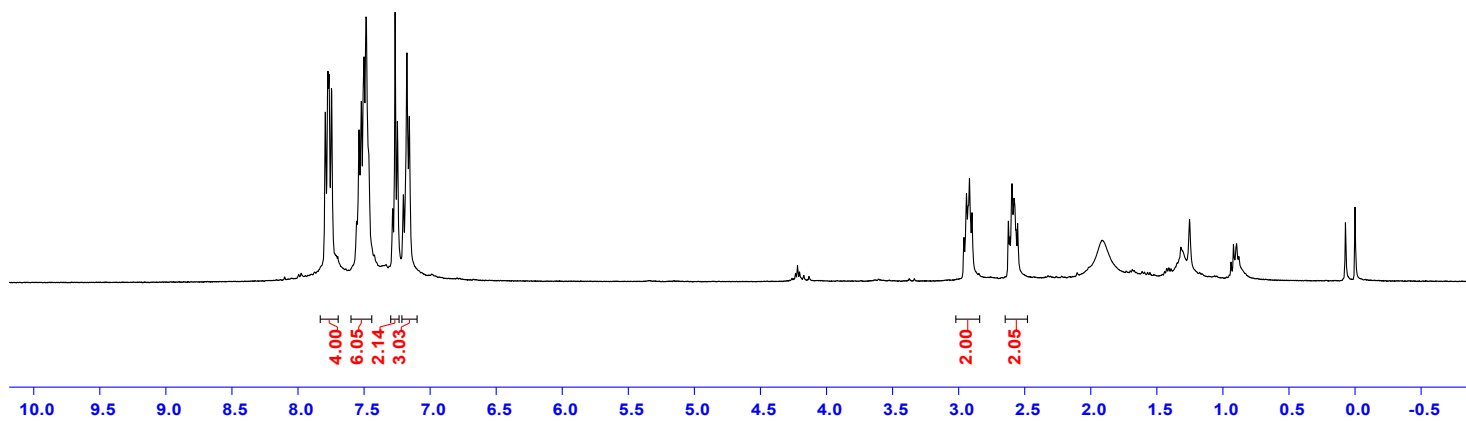

**<sup>13</sup>C NMR (101 MHz, CDCl<sub>3</sub>) spectra for 15**

lhc-x230822-2.11.fid — 1H NMR (400 MHz, CDCl<sub>3</sub>)

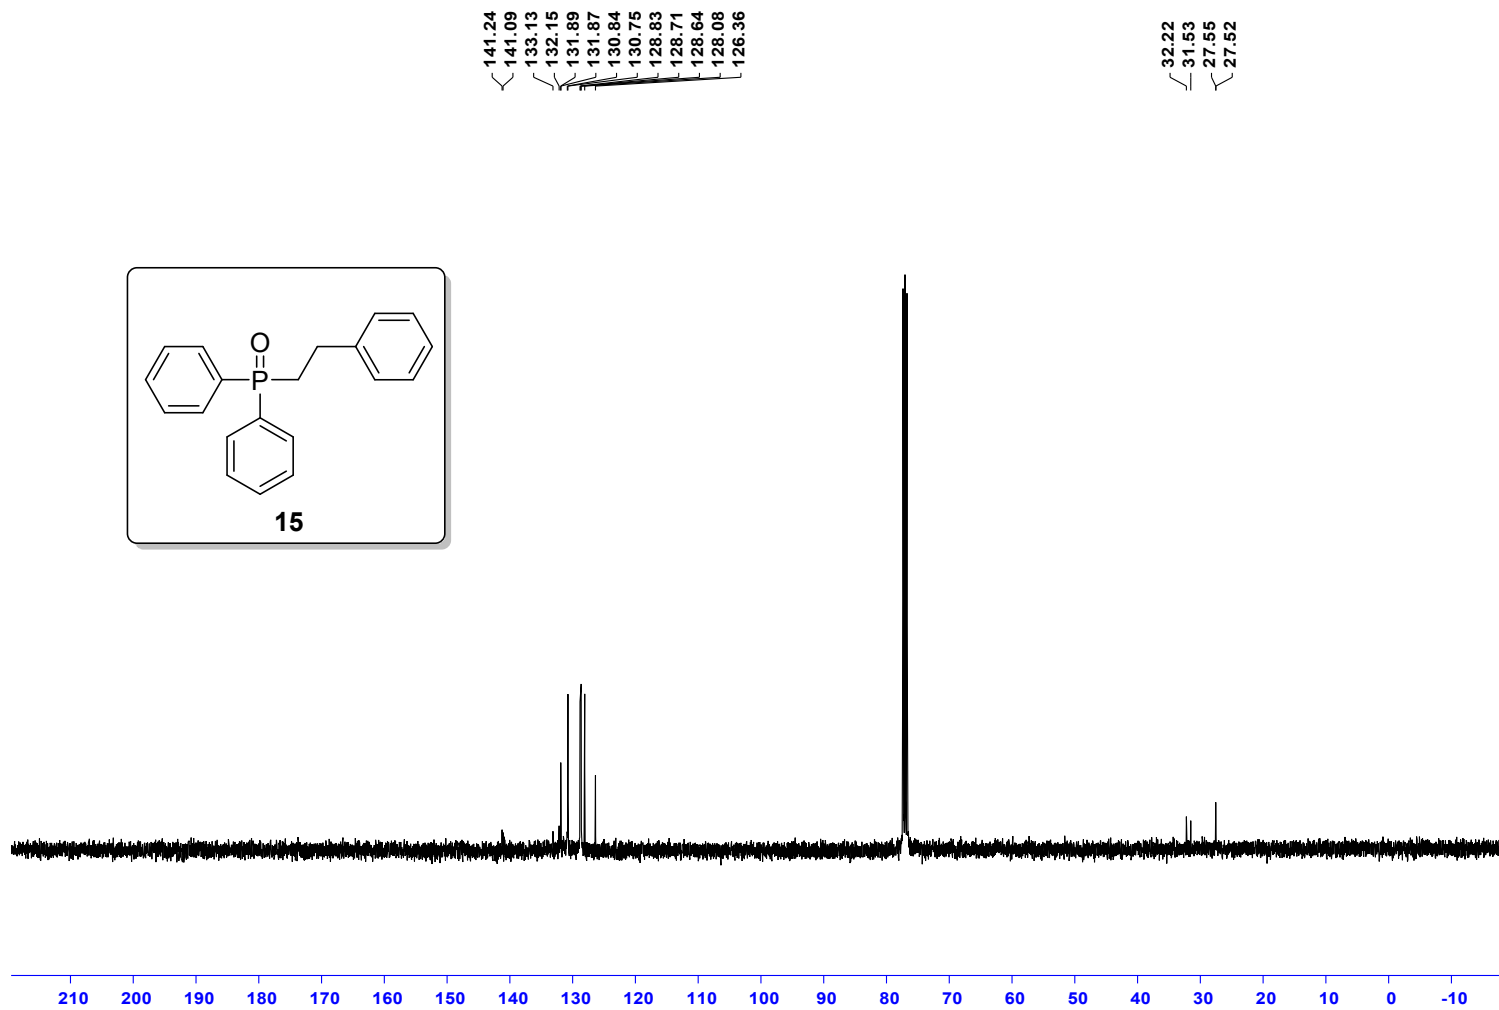

**<sup>31</sup>P NMR (162 MHz, CDCl<sub>3</sub>) spectra for 15**

lhc-x230822-2.12.fid — 1H NMR (400 MHz, CDCl<sub>3</sub>)

— 31.89

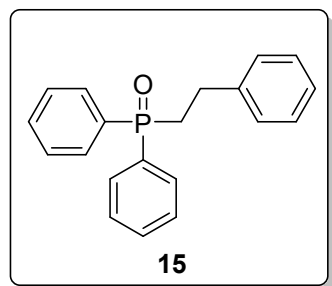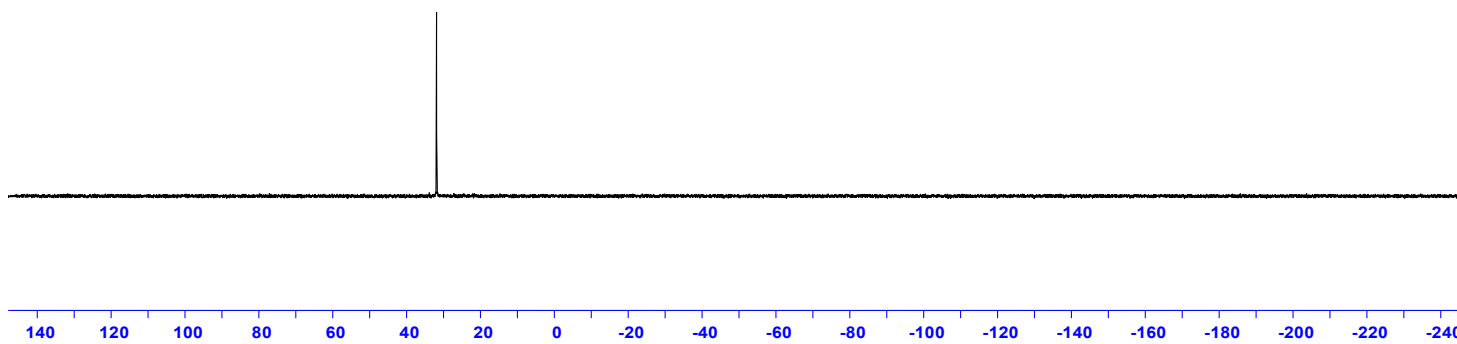

**<sup>1</sup>H NMR (500 MHz, CDCl<sub>3</sub>) spectra for 16**

lhc-x22z11-2Nap.1.fid — 1H NMR (400 MHz, CDCl<sub>3</sub>)

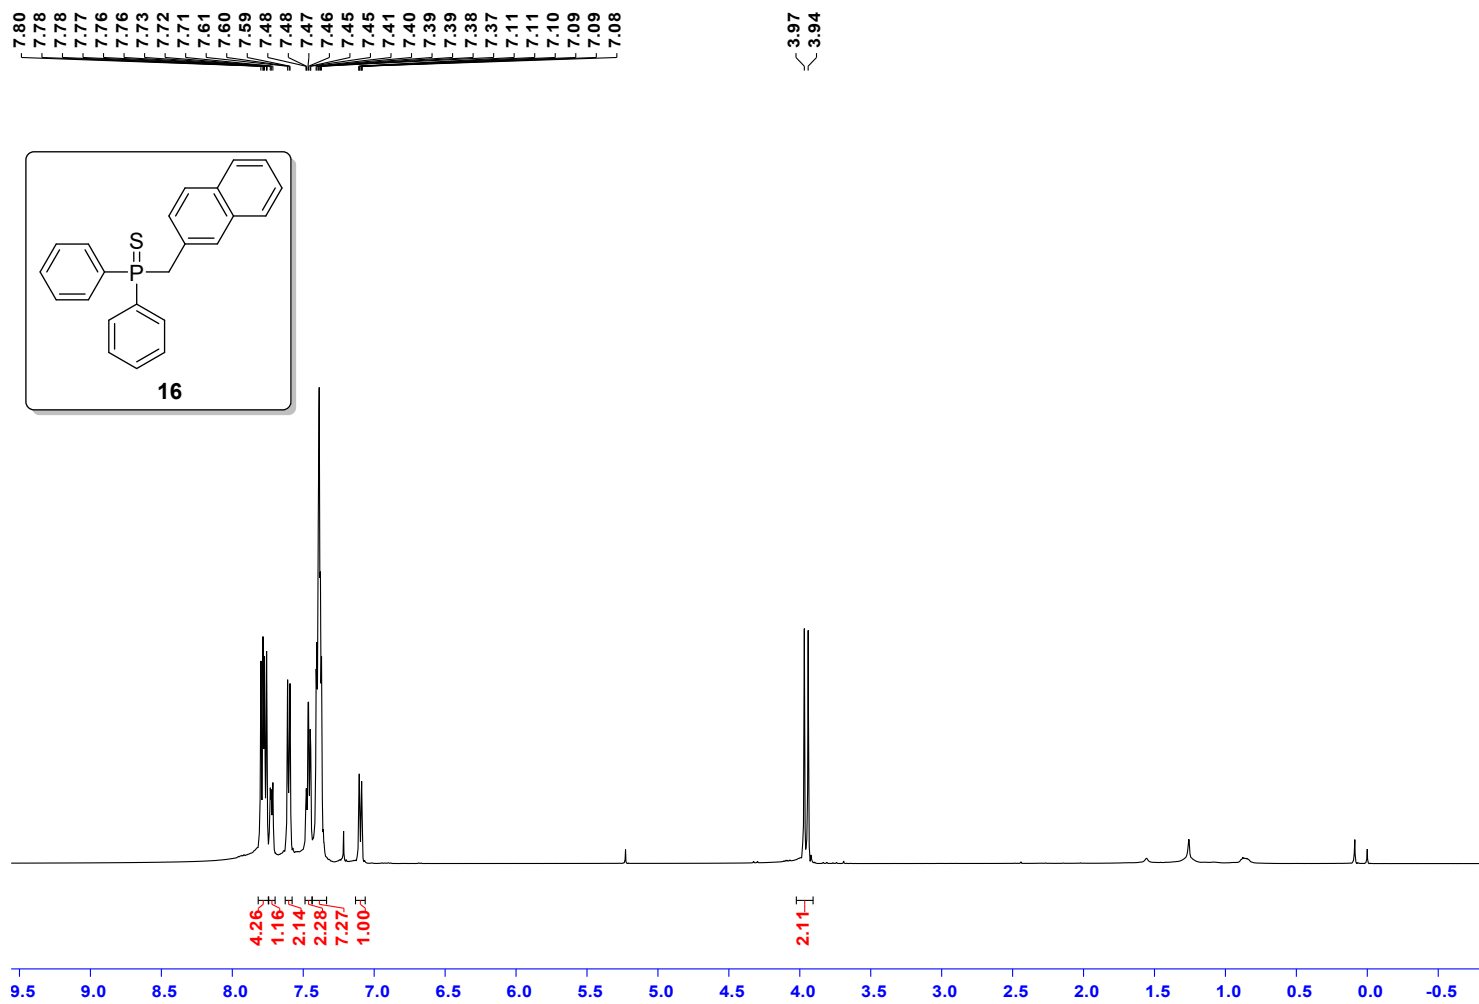

**<sup>13</sup>C NMR (126 MHz, CDCl<sub>3</sub>) spectra for 16**

lhc-x22z11-2Nap.2.fid — 1H NMR (400 MHz, CDCl<sub>3</sub>)

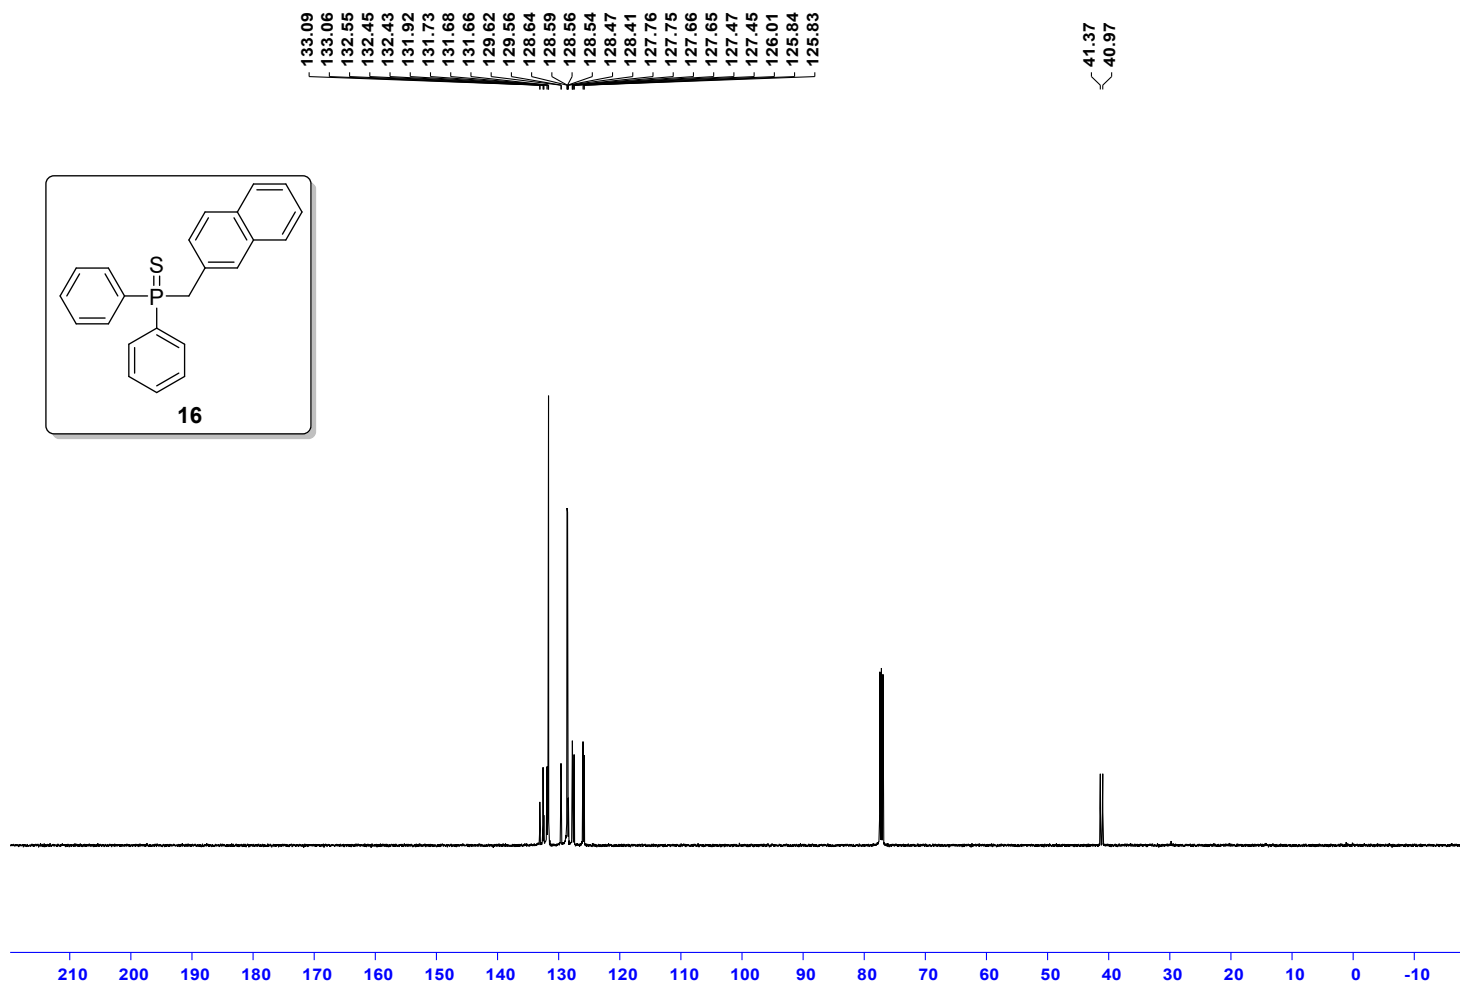

**$^{203}\text{P}$  NMR (202 MHz,  $\text{CDCl}_3$ ) spectra for 16**

lhc-x22z11-2Nap.3.fid —  $^1\text{H}$  NMR (400 MHz,  $\text{CDCl}_3$ )

— 42.07

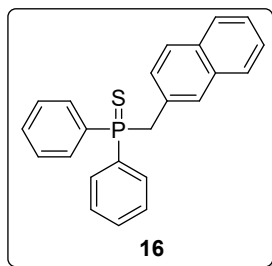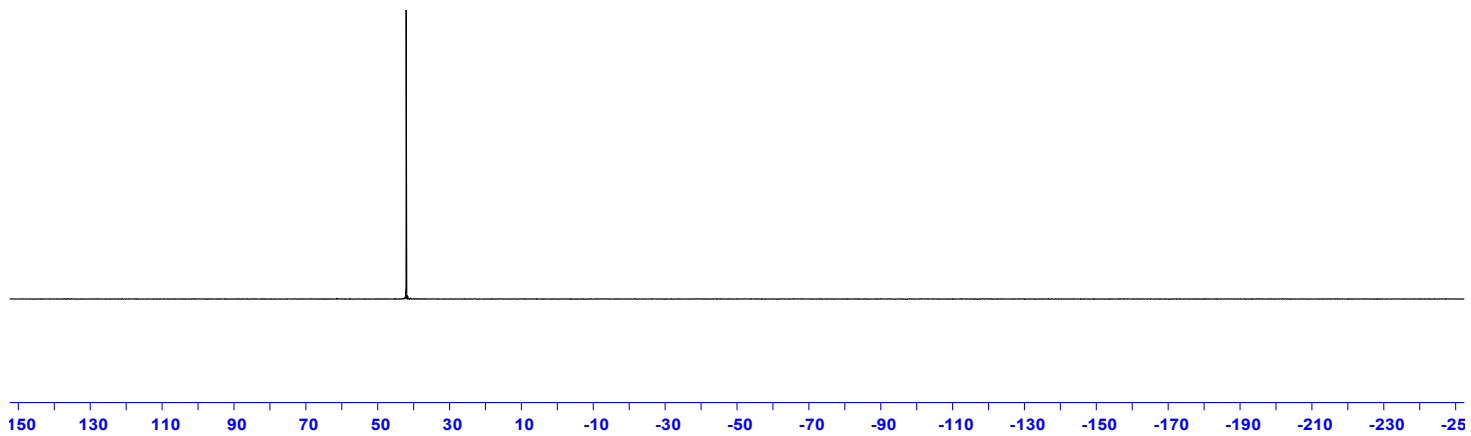

<sup>1</sup>H NMR (400 MHz, CDCl<sub>3</sub>) spectra for 17

lhc-x22z04-8saifen.1.fid — 1H NMR (400 MHz, CDCl<sub>3</sub>)

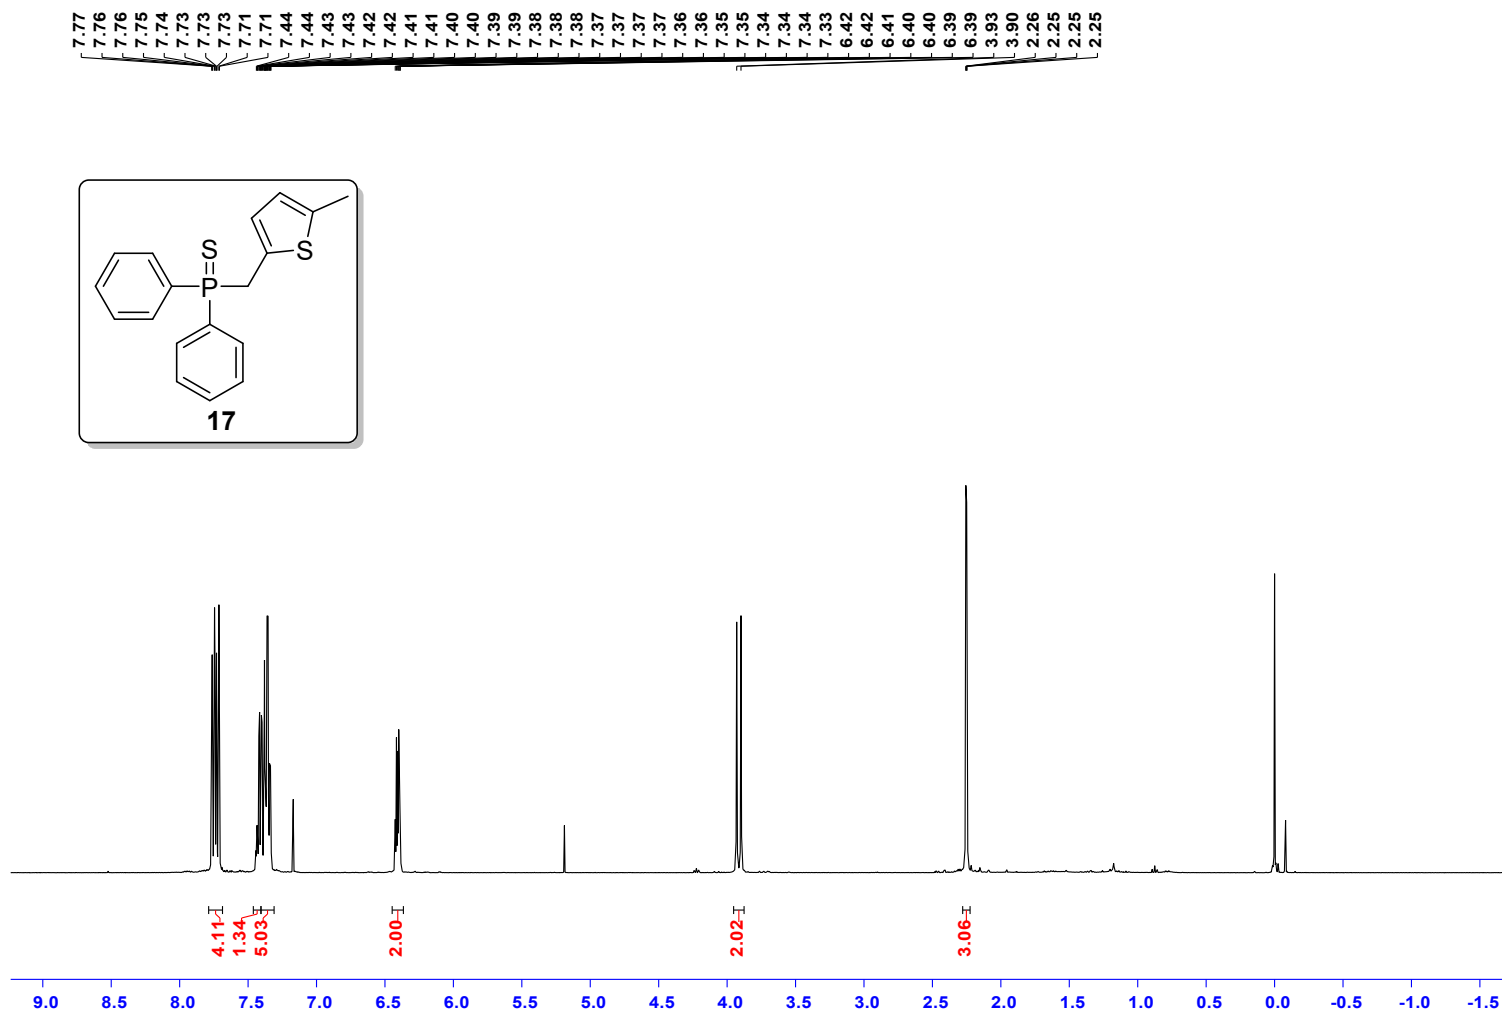

**<sup>13</sup>C NMR (101 MHz, CDCl<sub>3</sub>) spectra for 17**

lhc-x22z04-8saifen.2.fid — 1H NMR (400 MHz, CDCl<sub>3</sub>)

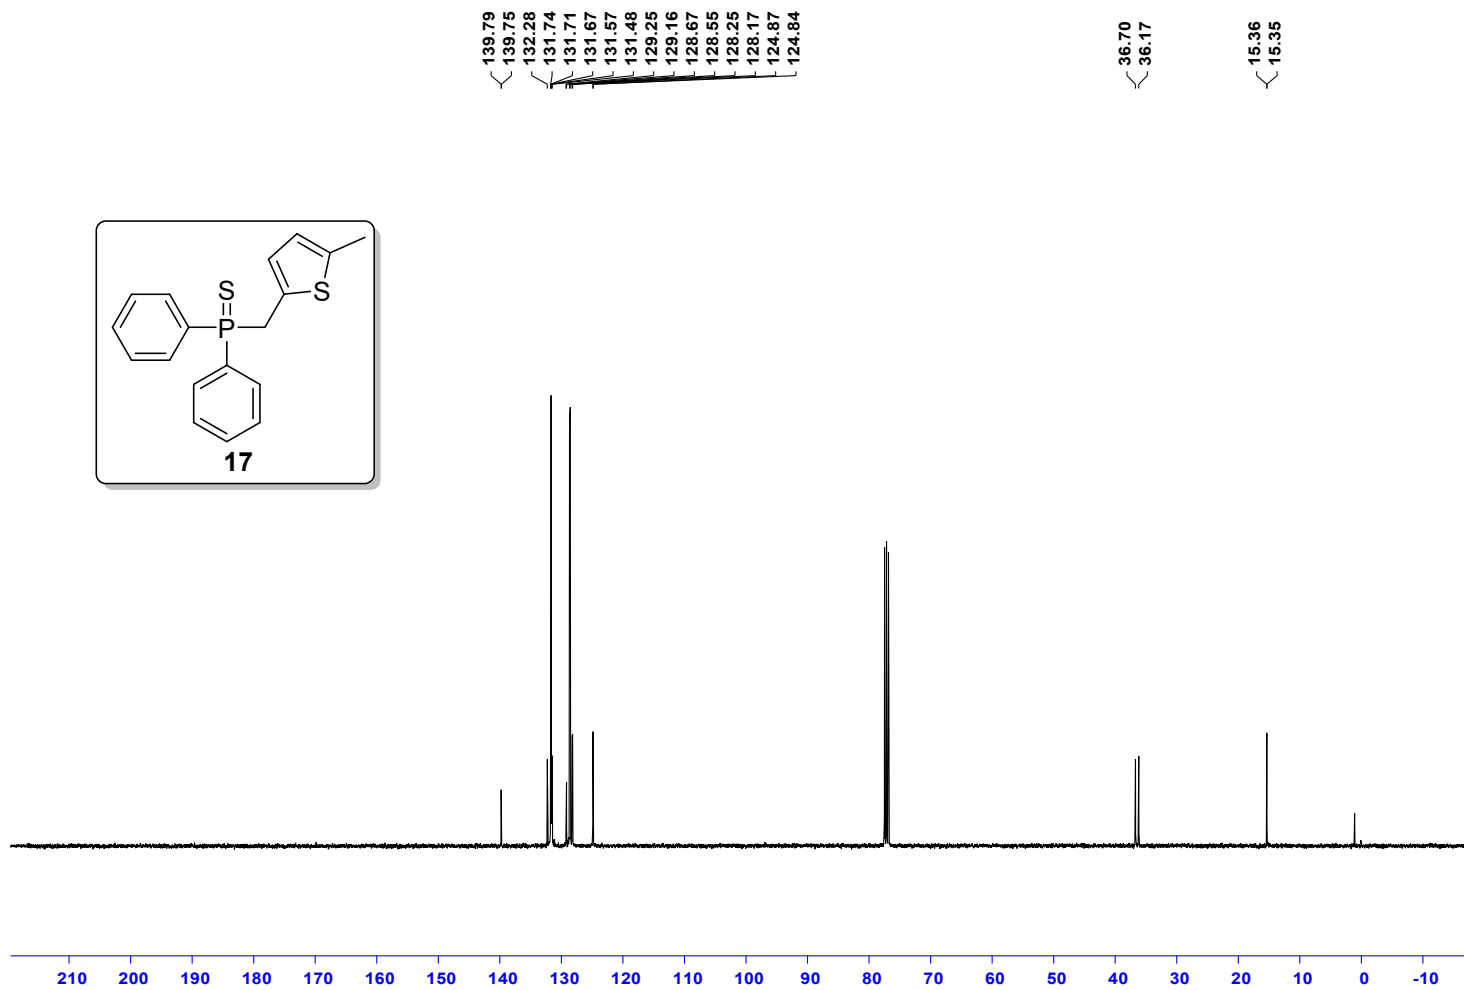



**$^{31}\text{P}$  NMR (162 MHz,  $\text{CDCl}_3$ ) spectra for 17**

lhc-x22z04-8saifen.3.fid —  $^1\text{H}$  NMR (400 MHz,  $\text{CDCl}_3$ )

41.06

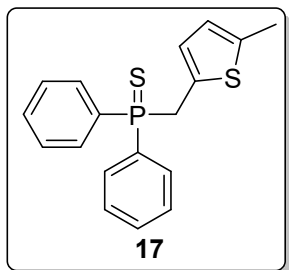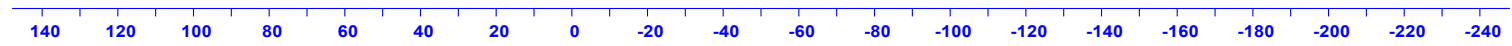

# <sup>1</sup>H NMR (400 MHz, CDCl<sub>3</sub>) spectra for 18

lhc-x22z04-4dioxane.1.fid — 1H NMR (400 MHz, CDCl<sub>3</sub>)

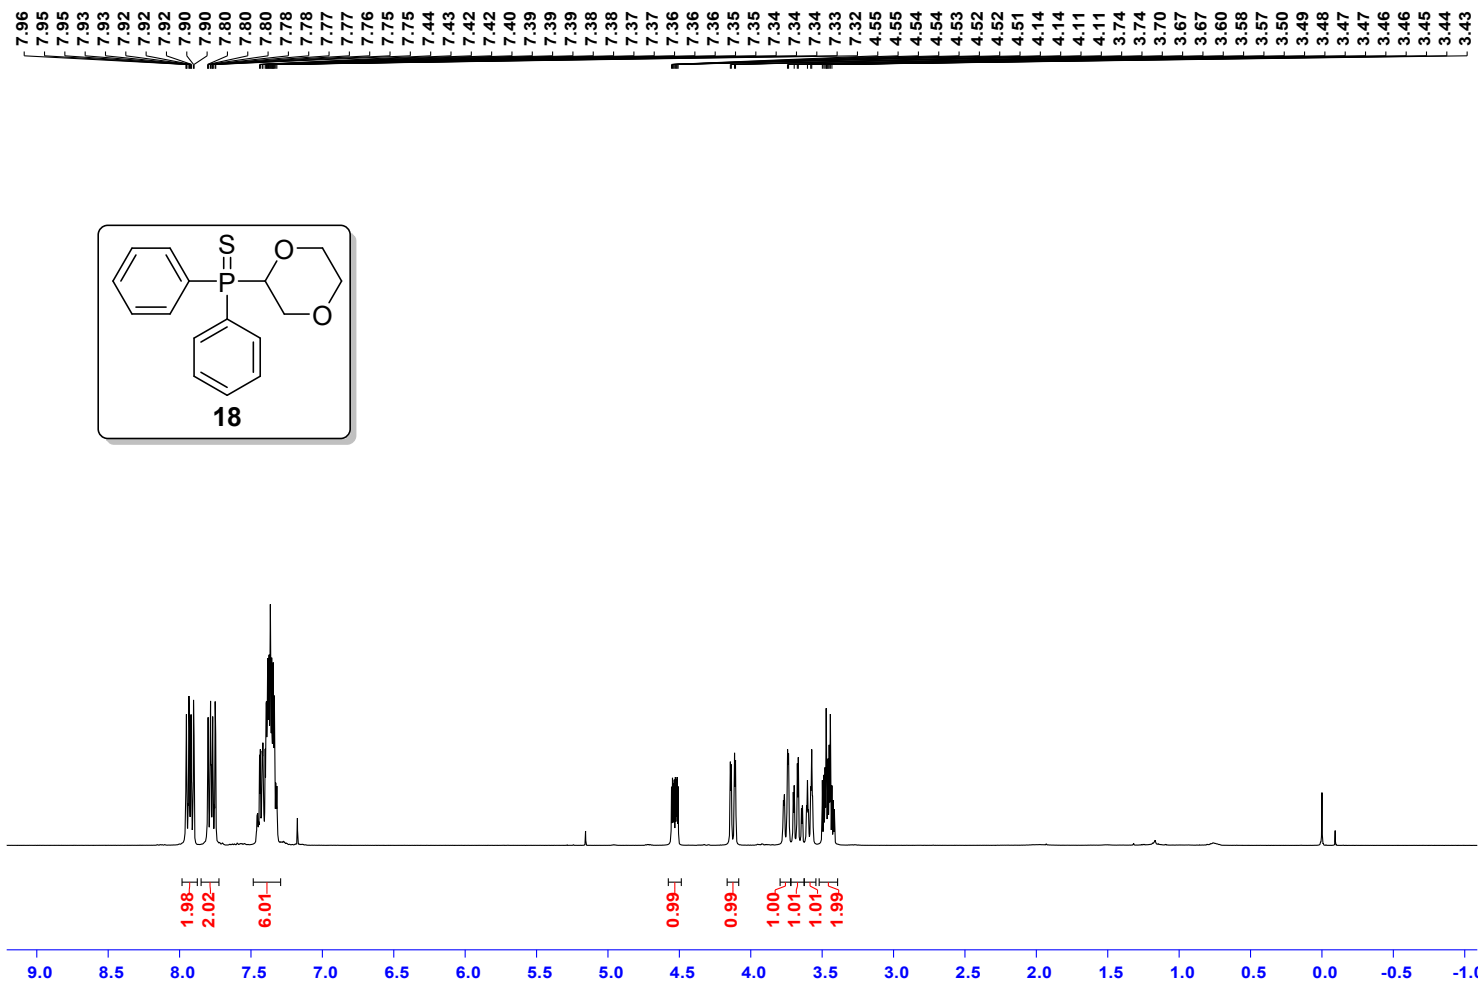

**<sup>13</sup>C NMR (101 MHz, CDCl<sub>3</sub>) spectra for 18**

lhc-x22z04-4dioxane.2.fid — 1H NMR (400 MHz, CDCl<sub>3</sub>)

132.87  
132.77  
131.98  
131.95  
131.80  
131.77  
131.54  
131.44  
130.66  
129.11  
128.64  
128.52  
128.33  
128.21

76.97  
76.27  
68.10  
68.02  
66.18  
65.99

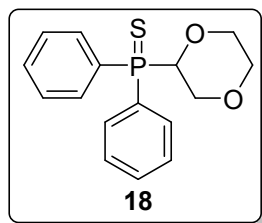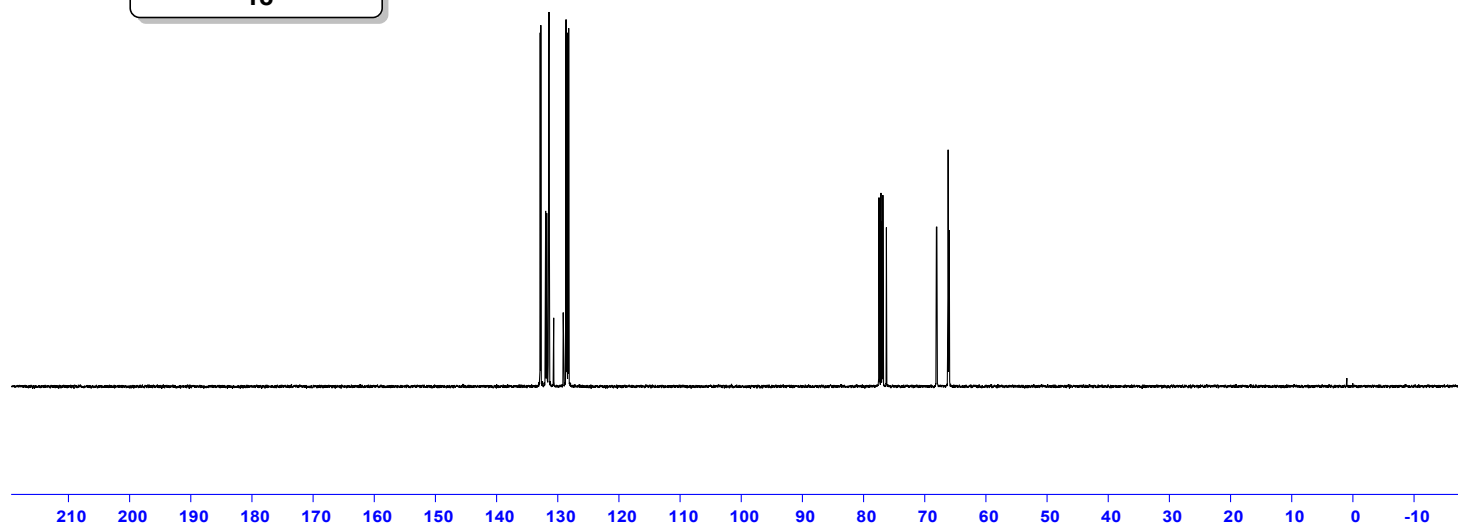

**<sup>31</sup>P NMR (162 MHz, CDCl<sub>3</sub>) spectra for 18**

lhc-x22z04-4dioxane.3.fid — 1H NMR (400 MHz, CDCl<sub>3</sub>)

37.09

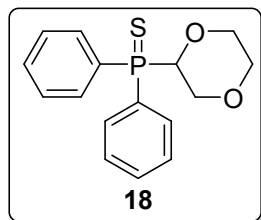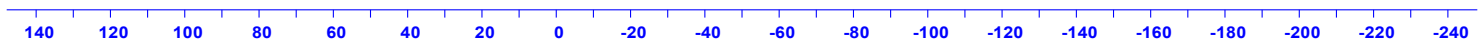

<sup>1</sup>H NMR (400 MHz, CDCl<sub>3</sub>) spectra for 19

lhc-x230824-1.10.fid — 1H NMR (400 MHz, CDCl<sub>3</sub>)

8.00  
7.98  
7.97  
7.95  
7.94  
7.92  
7.51  
7.49  
7.47  
7.46  
7.45  
7.44  
7.42

4.98  
4.96  
4.95  
4.94  
4.93  
4.91  
3.93  
3.91  
3.90  
3.88  
3.68  
3.66  
3.64  
3.62  
2.28  
2.26  
2.25  
2.23  
2.22  
2.21  
2.20  
2.18  
2.16  
2.15  
2.14  
2.13  
1.84  
1.82  
1.80  
1.79  
1.78  
1.77  
1.75  
1.73  
1.69  
1.68  
1.66  
1.65  
1.63  
1.62

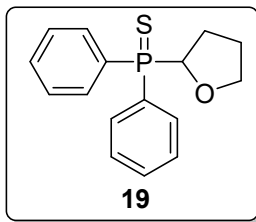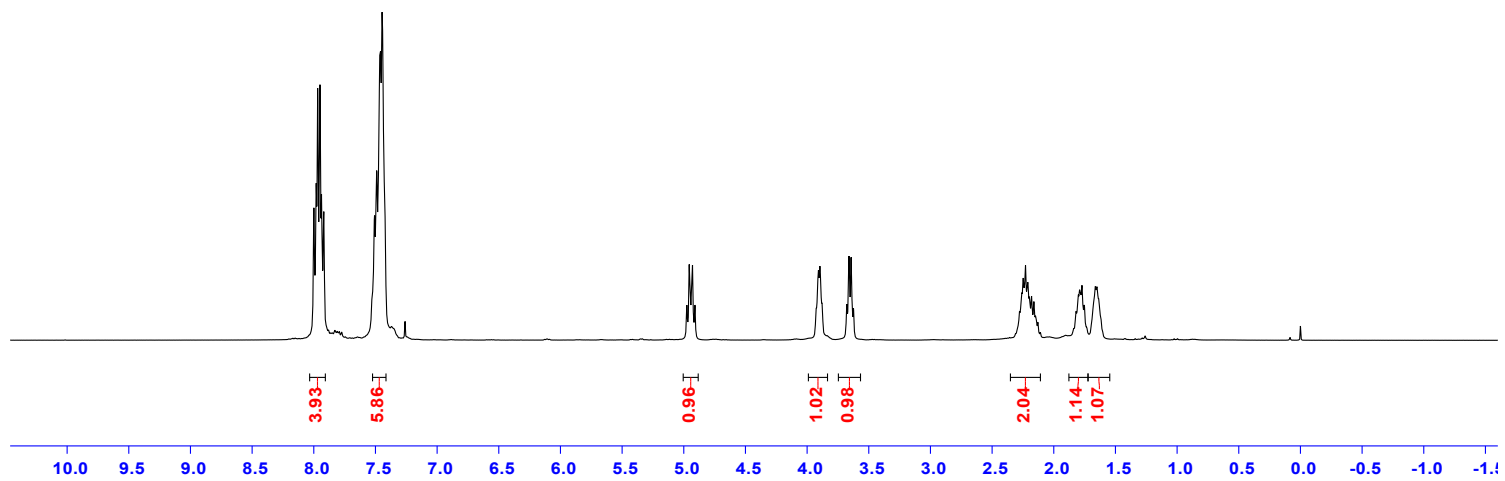

**$^{13}\text{C}$  NMR (101 MHz,  $\text{CDCl}_3$ ) spectra for 19**

lhc-x230824-1.11.fid —  $^1\text{H}$  NMR (400 MHz,  $\text{CDCl}_3$ )

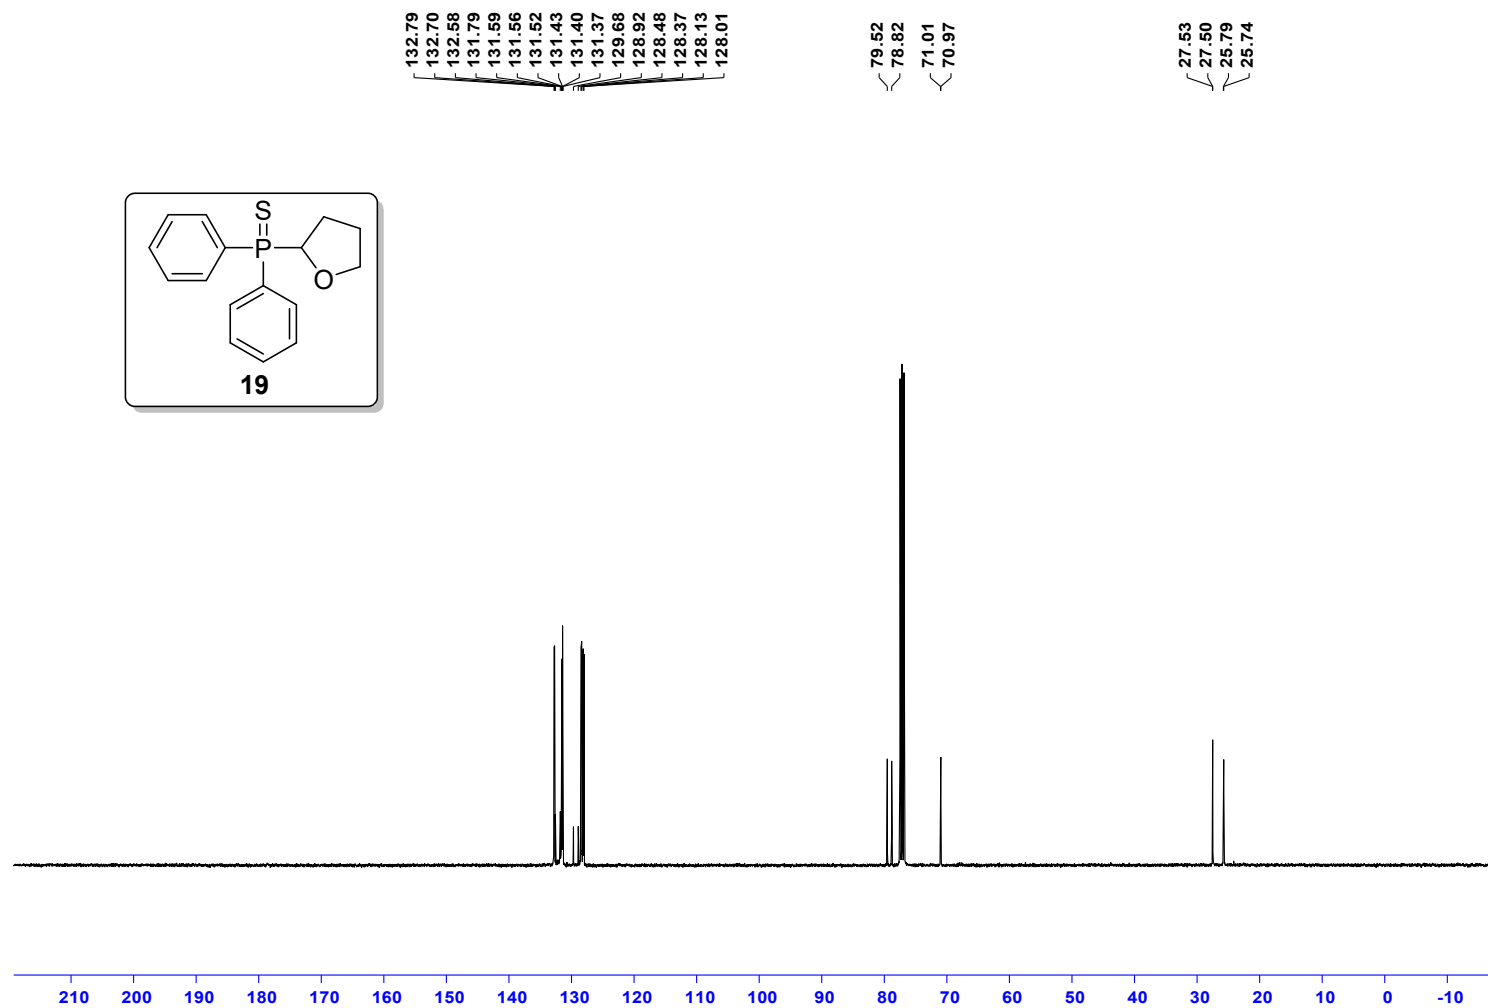

**<sup>31</sup>P NMR (162 MHz, CDCl<sub>3</sub>) spectra for 19**

lhc-x230824-1.12.fid — 1H NMR (400 MHz, CDCl<sub>3</sub>)

— 44.33

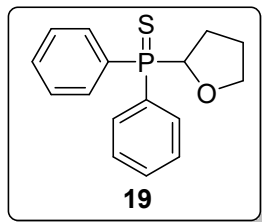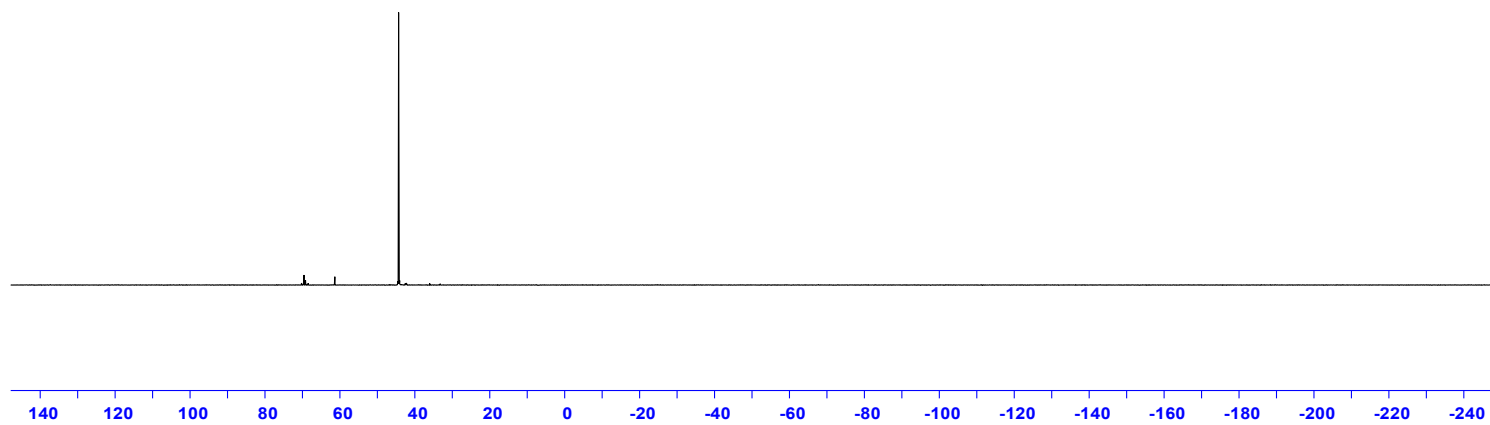

# <sup>1</sup>H NMR (400 MHz, CDCl<sub>3</sub>) spectra for 20

lhc-x22z04-3tBuOMe.1.fid — 1H NMR (400 MHz, CDCl<sub>3</sub>)

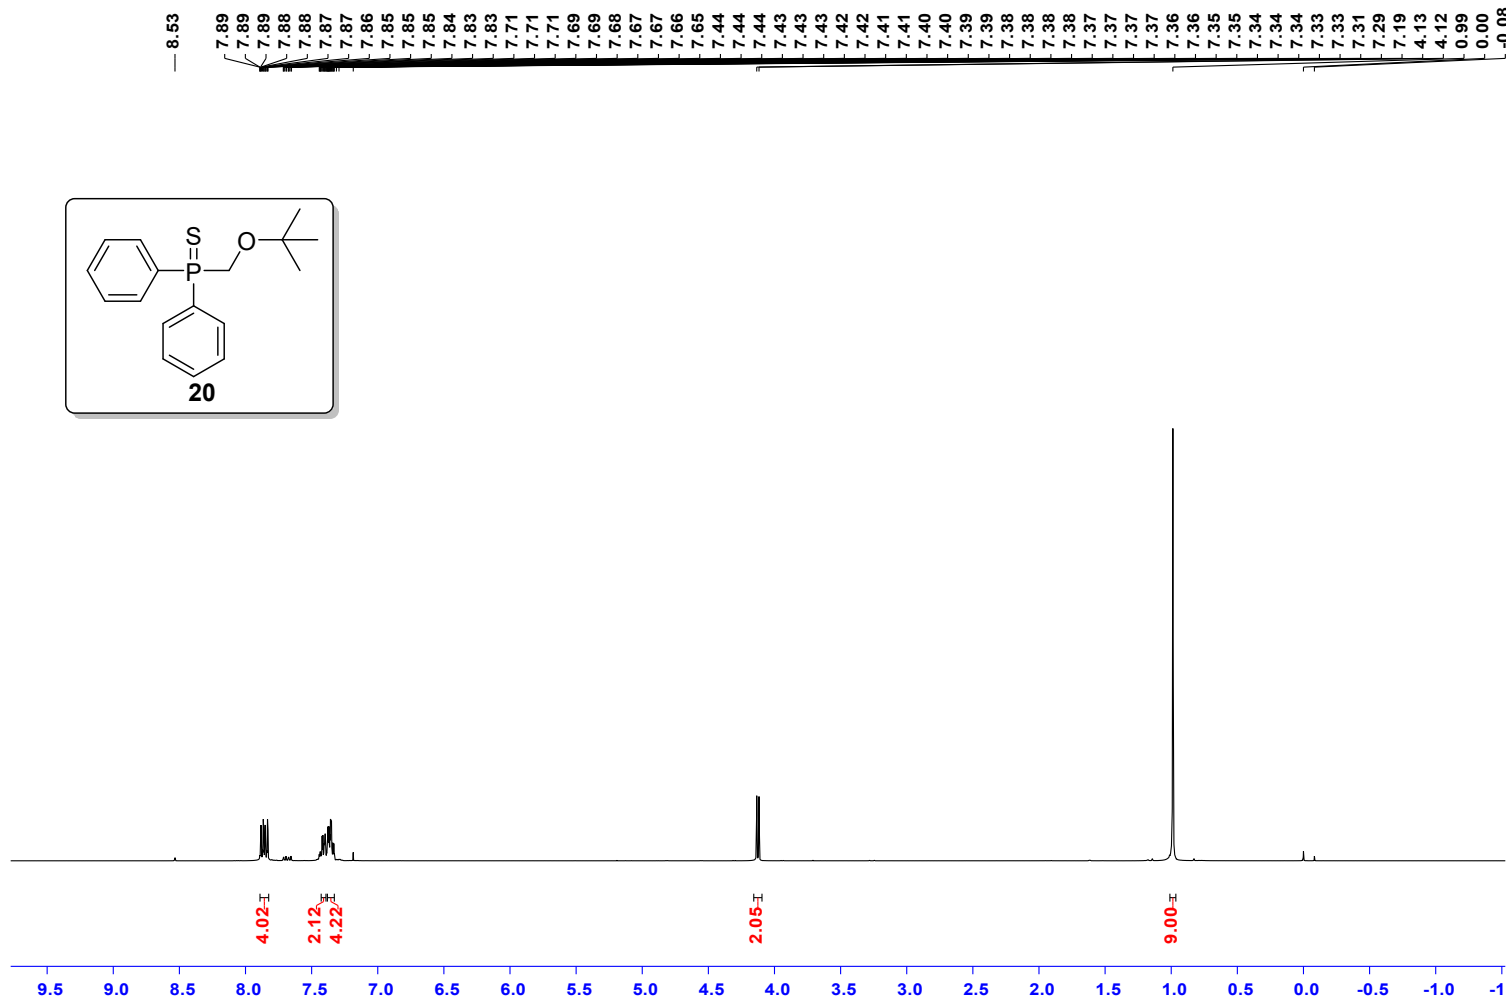



**<sup>13</sup>C NMR (101 MHz, CDCl<sub>3</sub>) spectra for 20**

lhc-x22z04-3tBuOMe.2.fid — 1H NMR (400 MHz, CDCl<sub>3</sub>)

132.30  
132.19  
131.67  
131.64  
131.62  
130.81  
128.30  
128.17

75.95  
75.85

66.08  
65.35

— 26.95

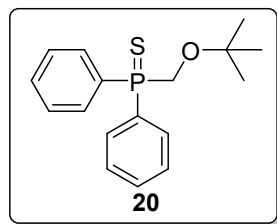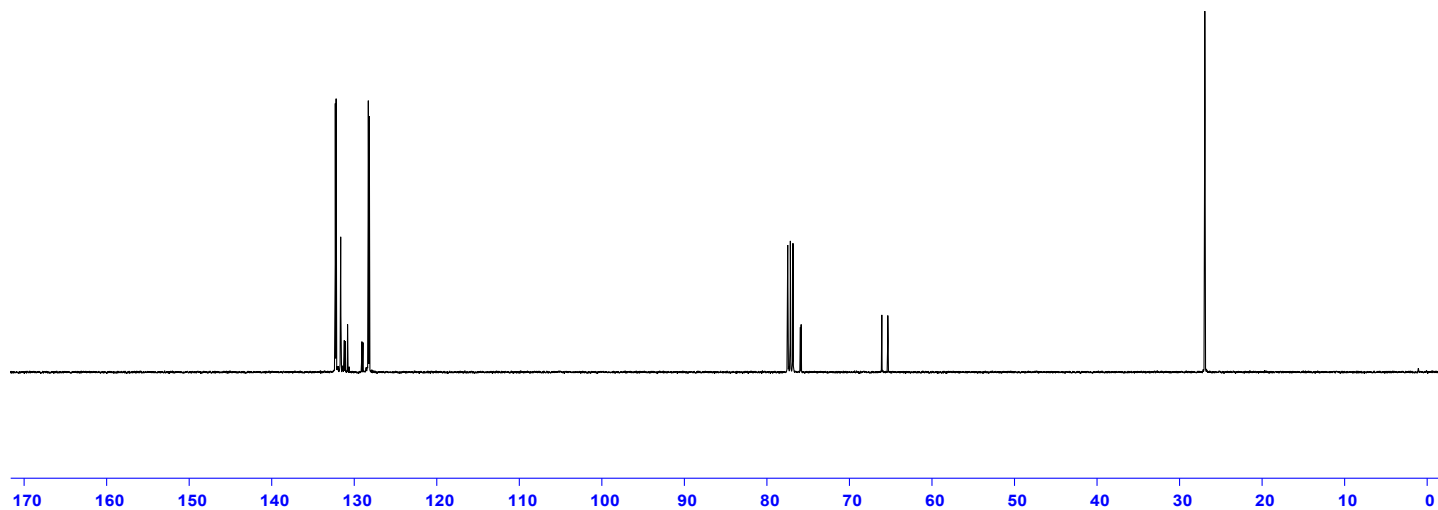

**<sup>31</sup>P NMR (162 MHz, CDCl<sub>3</sub>) spectra for 20**

lhc-x22z04-3tBuOMe.3.fid — 1H NMR (400 MHz, CDCl<sub>3</sub>)

— 38.68

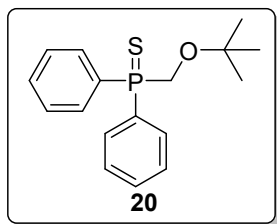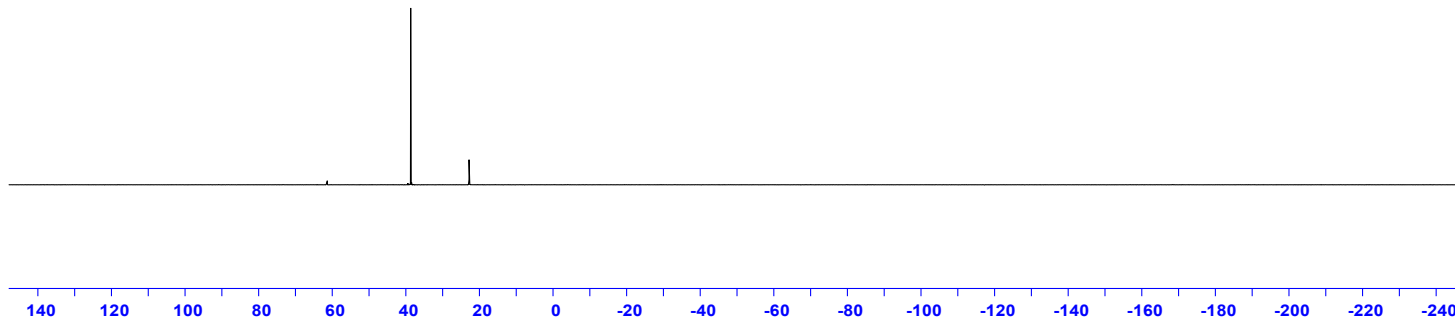

<sup>1</sup>H NMR (400 MHz, CDCl<sub>3</sub>) spectra for 21

lhc-x22z17-1PhOMe.1.fid — 1H NMR (400 MHz, CDCl<sub>3</sub>)

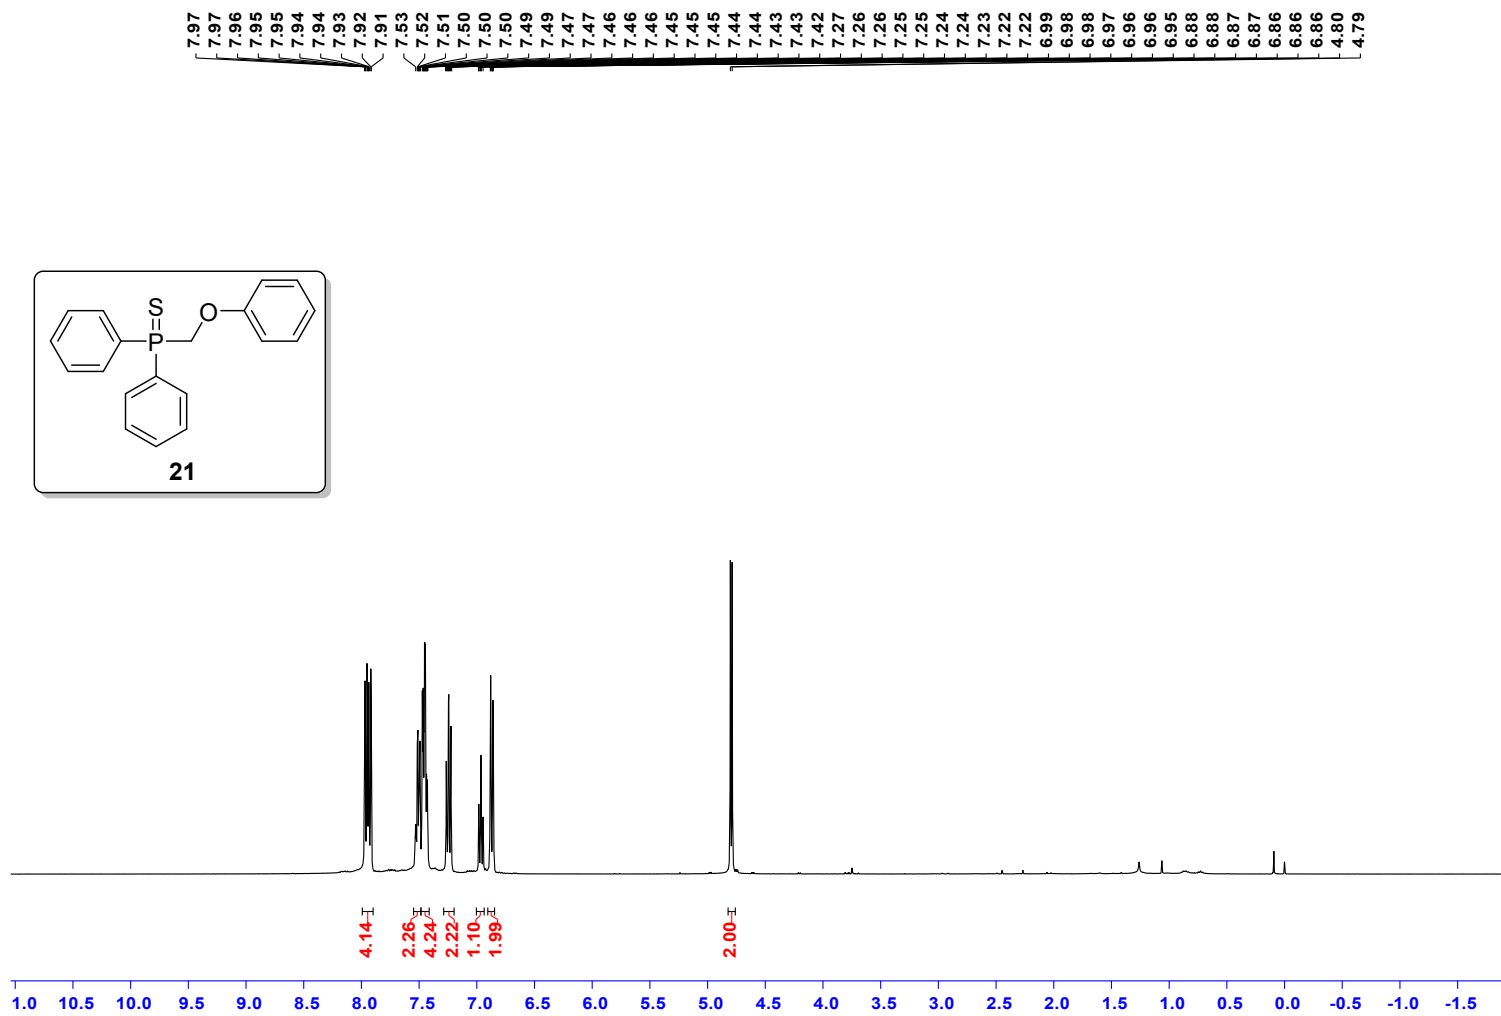

**<sup>13</sup>C NMR (101 MHz, CDCl<sub>3</sub>) spectra for 21**

lhc-x22z17-1PhOMe.2.fid — 1H NMR (400 MHz, CDCl<sub>3</sub>)

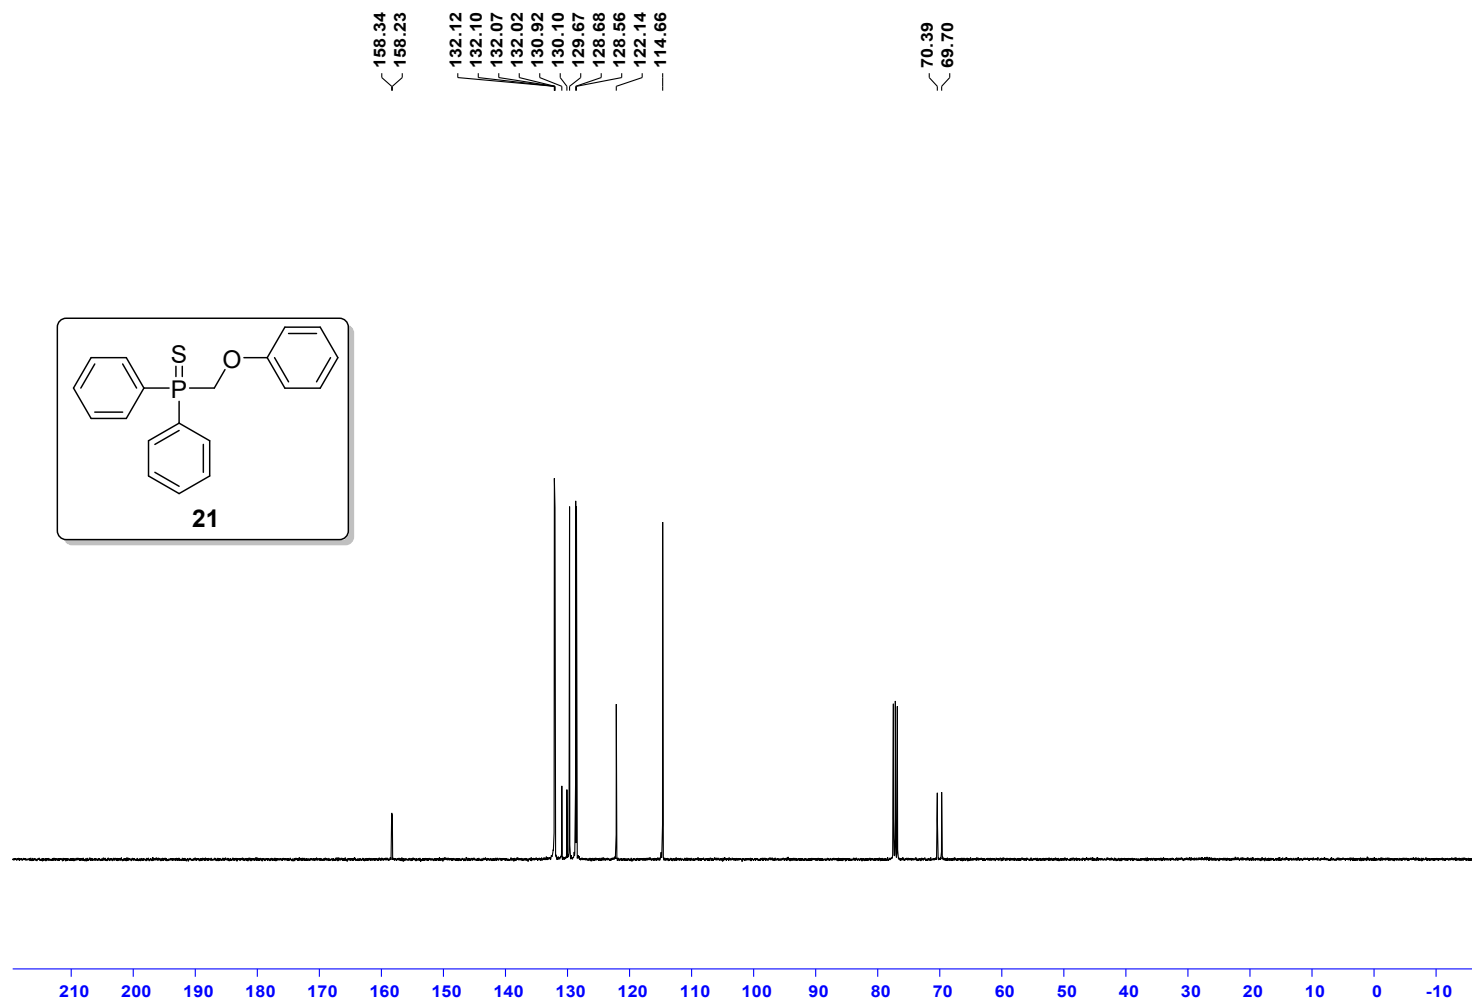

**$^{31}\text{P}$  NMR (162 MHz,  $\text{CDCl}_3$ ) spectra for 21**

lhc-x22z17-1PhOMe.3.fid —  $^1\text{H}$  NMR (400 MHz,  $\text{CDCl}_3$ )

— 37.13

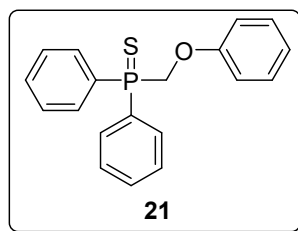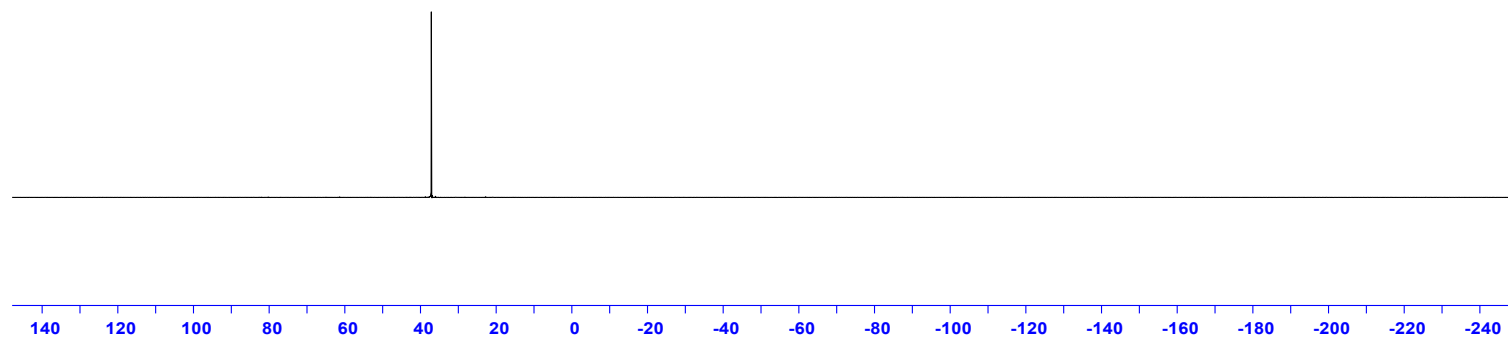

**<sup>1</sup>H NMR (400 MHz, CDCl<sub>3</sub>) spectra for 22**

lhc-x22z11-4DMA-1.1.fid — 1H NMR (400 MHz, CDCl<sub>3</sub>)

7.92  
7.91  
7.90  
7.89  
7.88  
7.87  
7.44  
7.44  
7.43  
7.43  
7.42  
7.42  
7.41  
7.40  
7.39  
7.38  
7.37  
4.56  
4.55  
— 3.08  
— 1.86

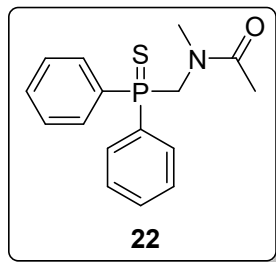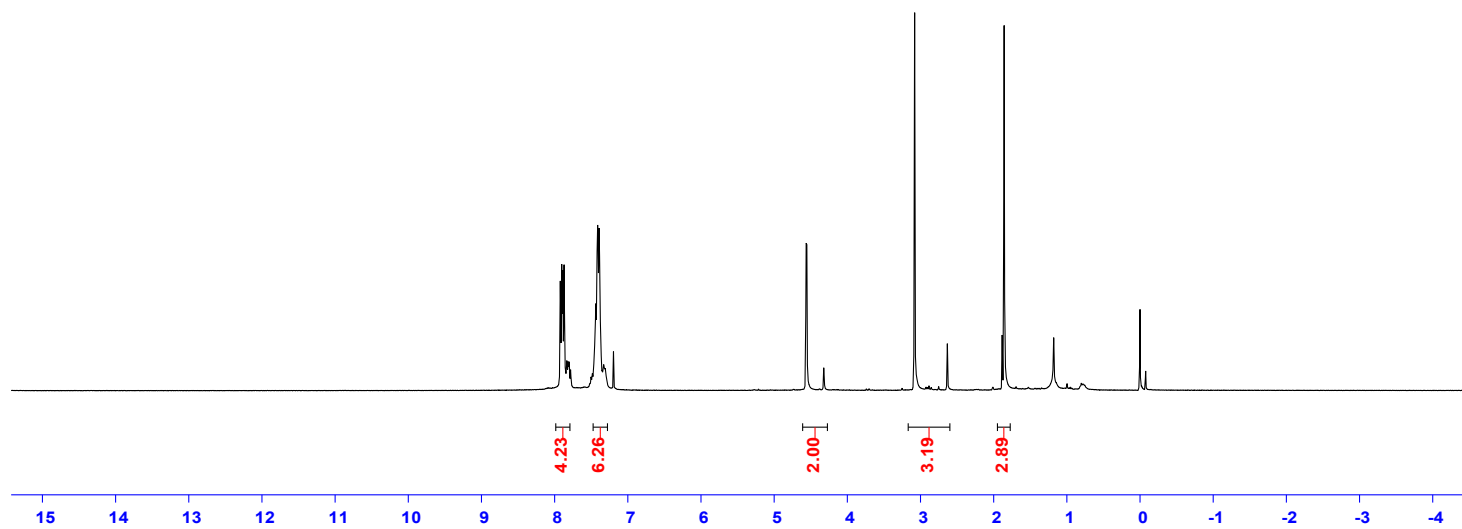

**<sup>13</sup>C NMR (101 MHz, CDCl<sub>3</sub>) spectra for 22**

lhc-x22z11-4DMA-1.2.fid — 1H NMR (400 MHz, CDCl<sub>3</sub>)

— 171.10

131.88  
131.85  
131.74  
131.63  
131.39  
130.62  
128.64  
128.51

51.82  
51.21

— 38.31

— 21.31

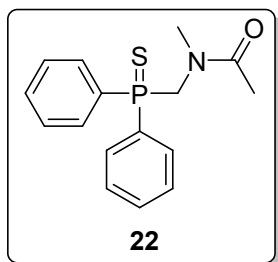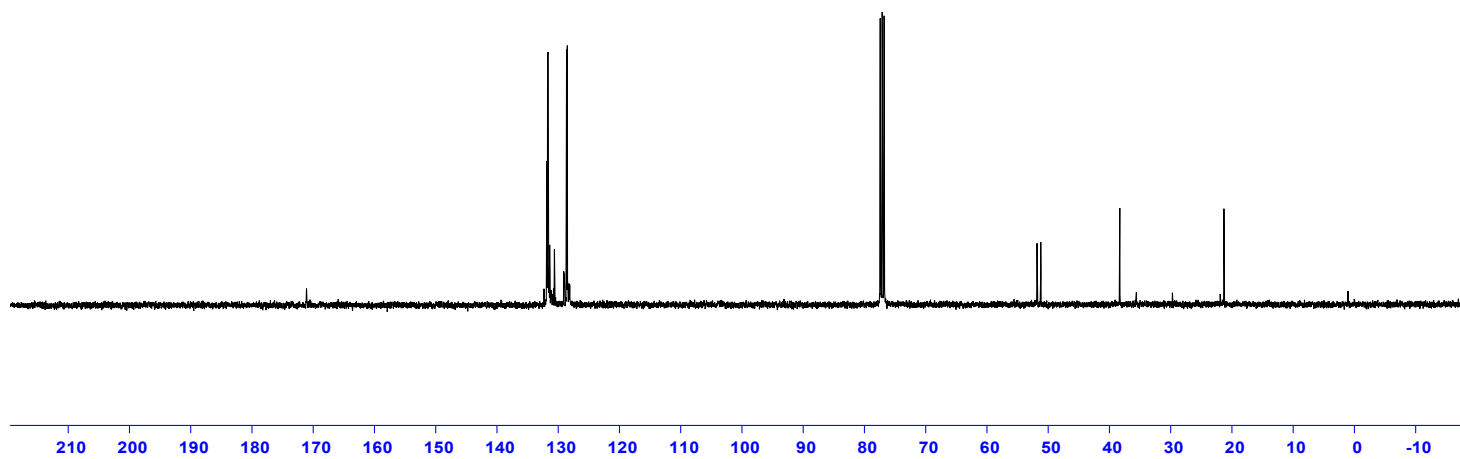

**$^{31}\text{P}$  NMR (162 MHz,  $\text{CDCl}_3$ ) spectra for 22**

lhc-x22z11-4DMA-1.3.fid —  $^1\text{H}$  NMR (400 MHz,  $\text{CDCl}_3$ )

— 39.99

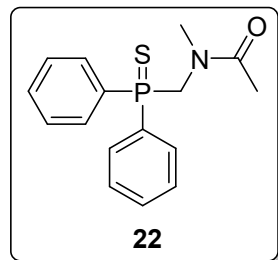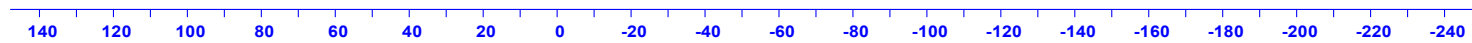



**<sup>1</sup>H NMR (500 MHz, CDCl<sub>3</sub>) spectra for 23**

lhc-x230821-3.1.fid — <sup>1</sup>H NMR (400 MHz, CDCl<sub>3</sub>)

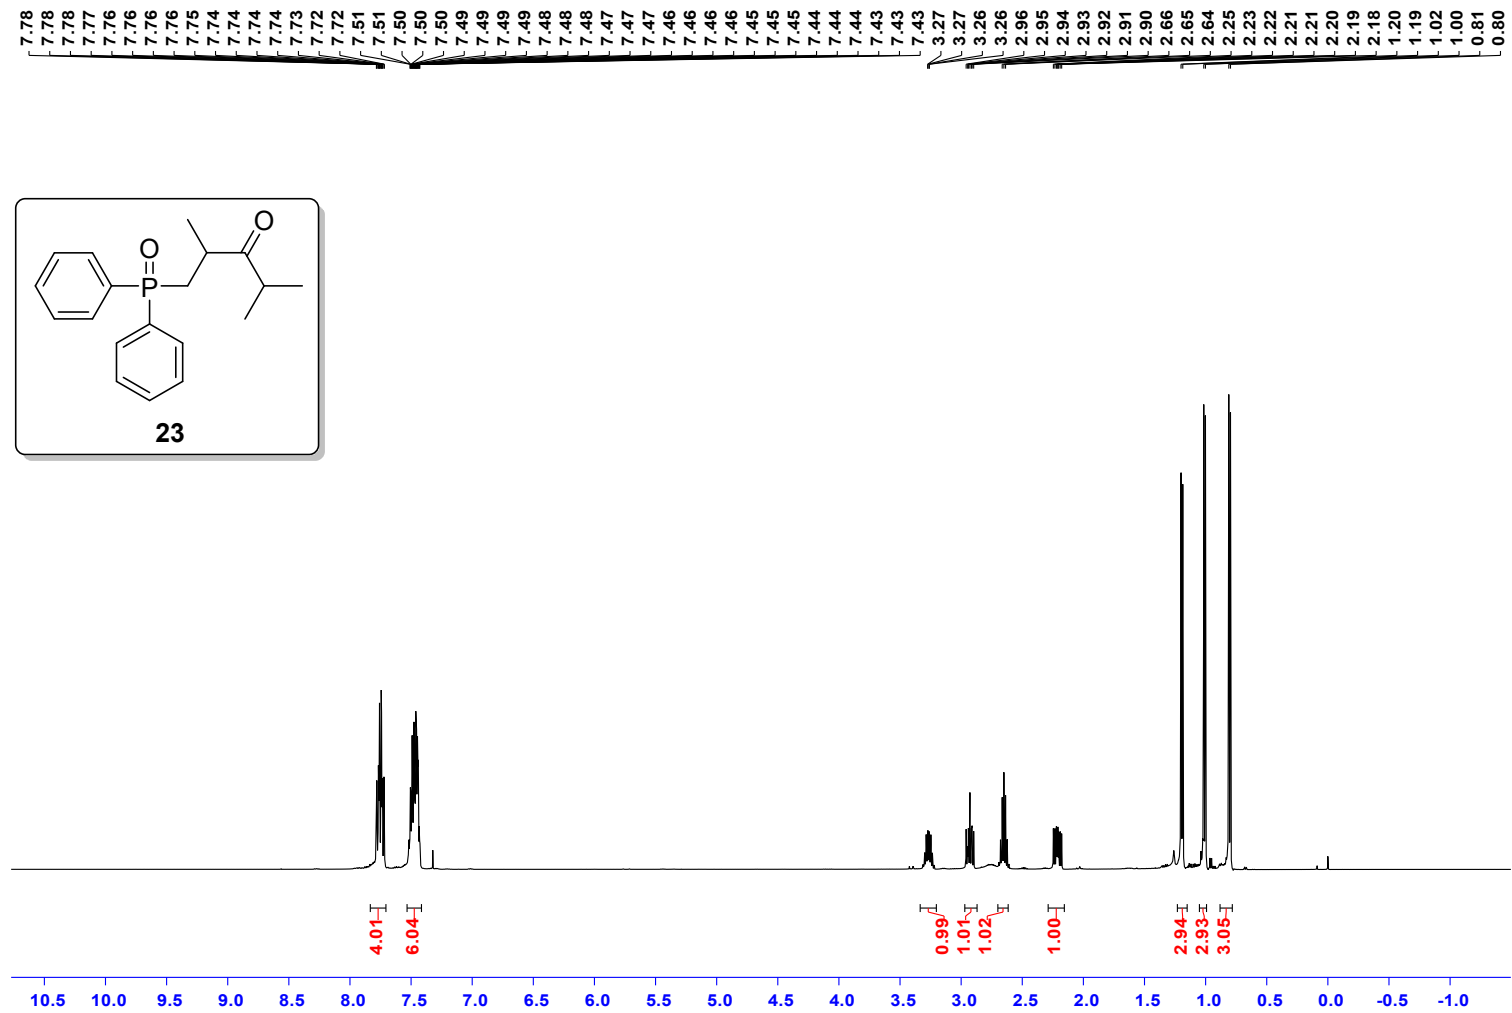

**<sup>13</sup>C NMR (126 MHz, CDCl<sub>3</sub>) spectra for 23**

lhc-x230821-3.2.fid — 1H NMR (400 MHz, CDCl<sub>3</sub>)

216.17  
216.12

134.13  
133.35  
132.74  
131.96  
131.82  
131.80  
131.77  
131.75  
131.00  
130.93  
130.50  
130.42  
128.74  
128.64  
128.55

39.31  
37.94  
37.92  
32.15  
31.58  
19.56  
19.50  
18.35  
18.09

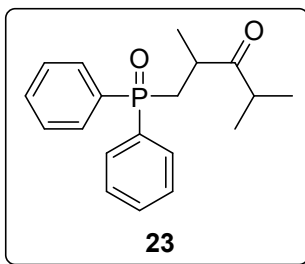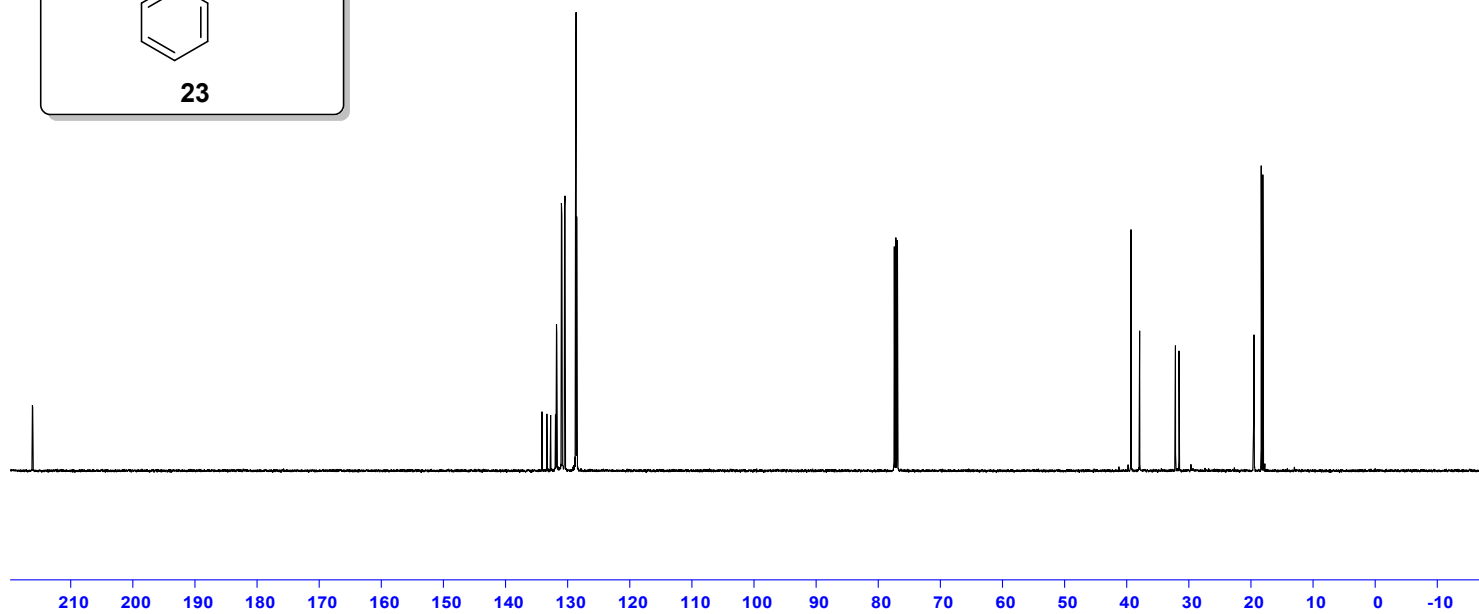

**<sup>31</sup>P NMR (202 MHz, CDCl<sub>3</sub>) spectra for 23**

lhc-x230821-3.3.fid — 1H NMR (400 MHz, CDCl<sub>3</sub>)

— 30.79

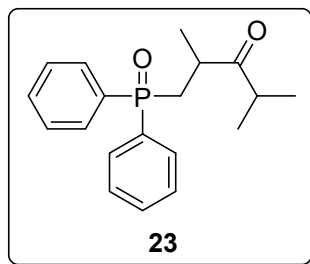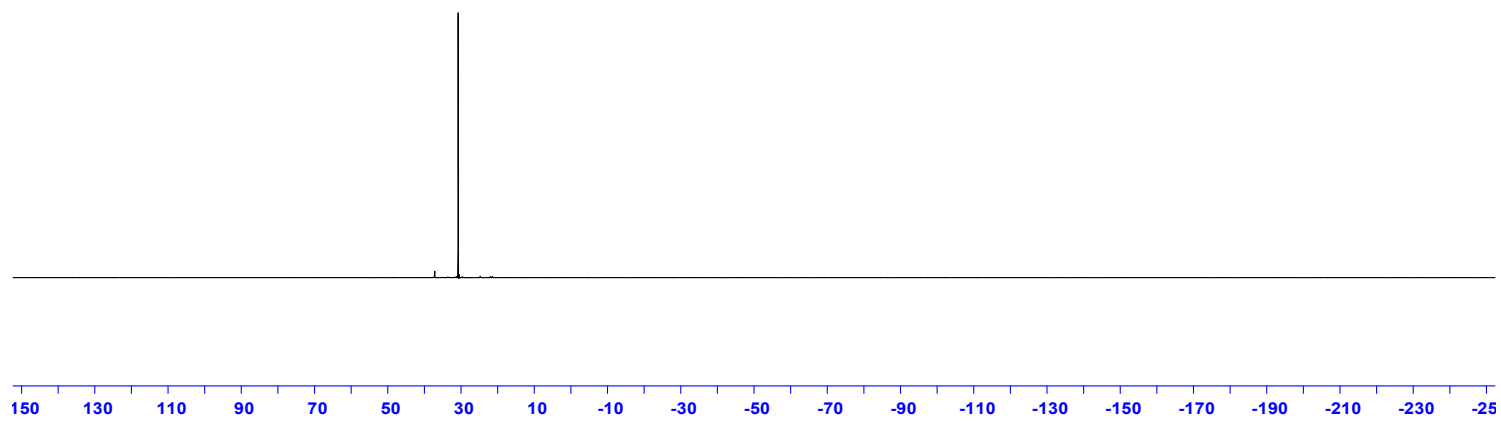

**<sup>1</sup>H NMR (500 MHz, CDCl<sub>3</sub>) spectra for 24**

lhc-x230821-2.1.fid — 1H NMR (400 MHz, CDCl<sub>3</sub>)

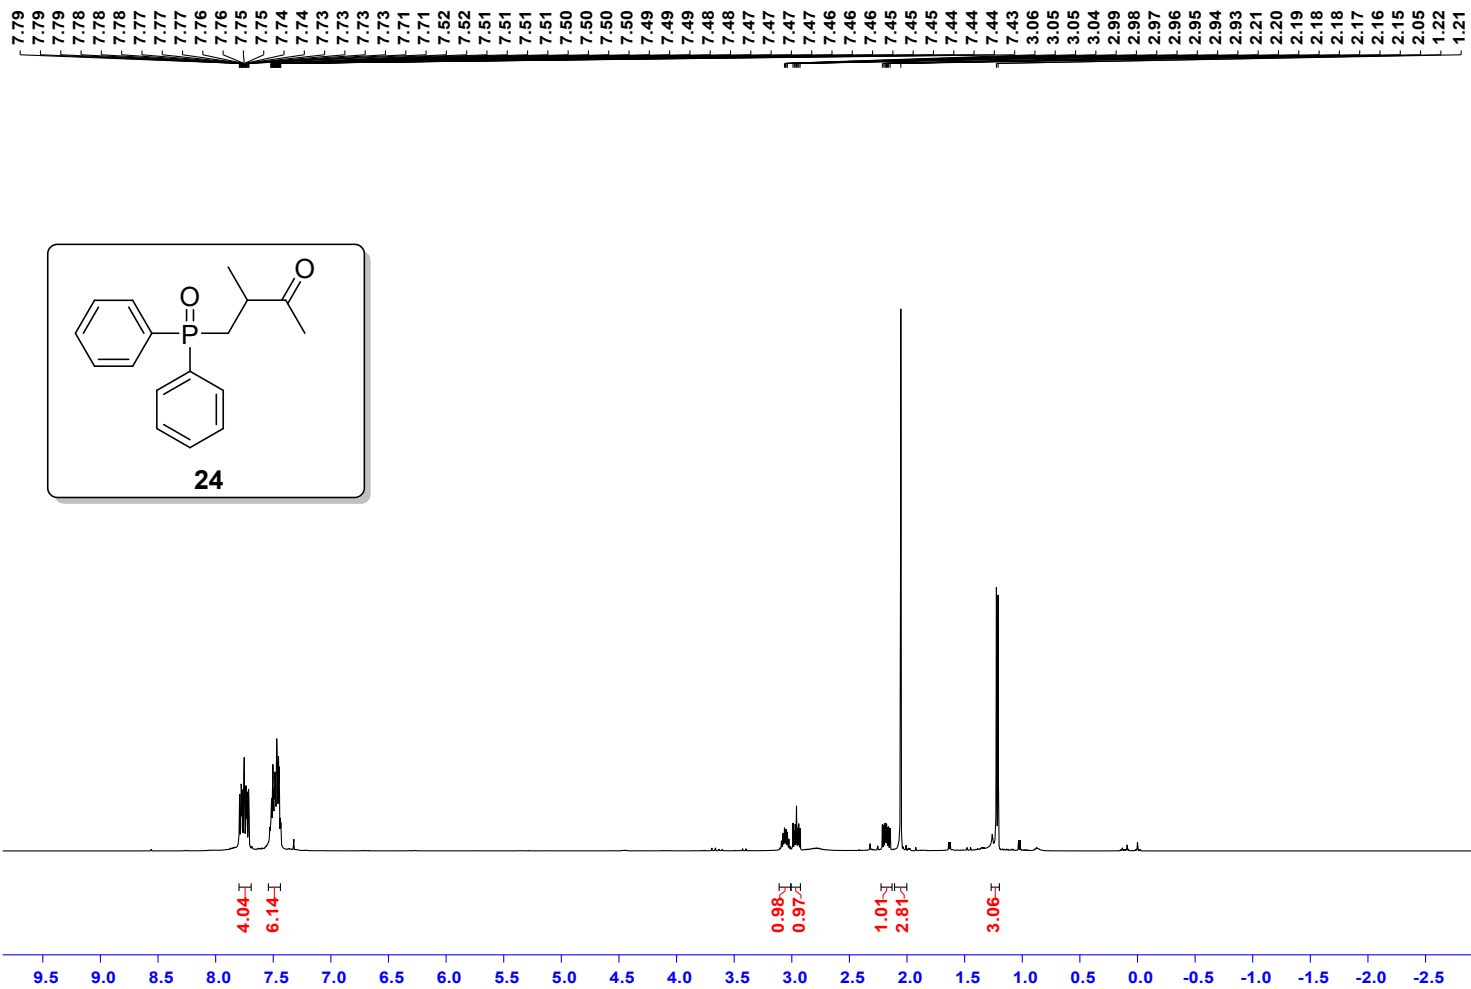

**<sup>13</sup>C NMR (126 MHz, CDCl<sub>3</sub>) spectra for 24**

lhc-x230821-2.2.fid — 1H NMR (400 MHz, CDCl<sub>3</sub>)

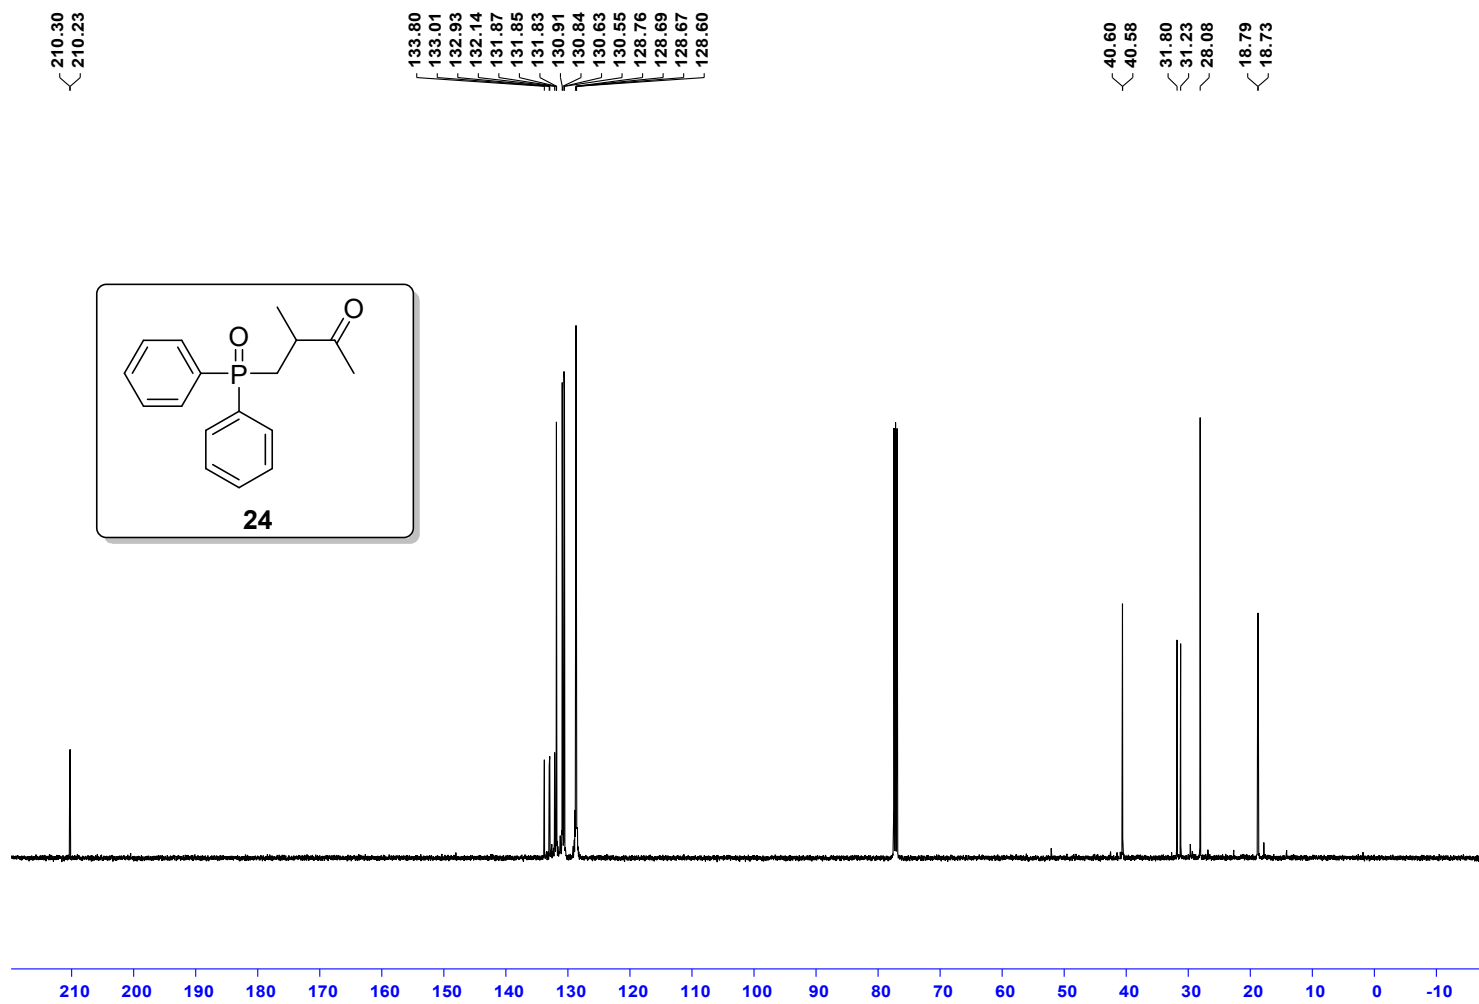

**$^{31}\text{P}$  NMR (202 MHz,  $\text{CDCl}_3$ ) spectra for 24**

lhc-x230821-2.3.fid — 1H NMR (400 MHz,  $\text{CDCl}_3$ )

31.03  
—

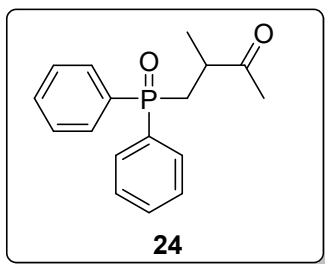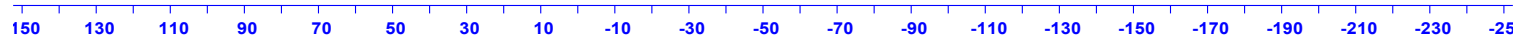

<sup>1</sup>H NMR (400 MHz, CDCl<sub>3</sub>) spectra for 25

lhc-x230820-1.1.fid — 1H NMR (400 MHz, CDCl<sub>3</sub>)

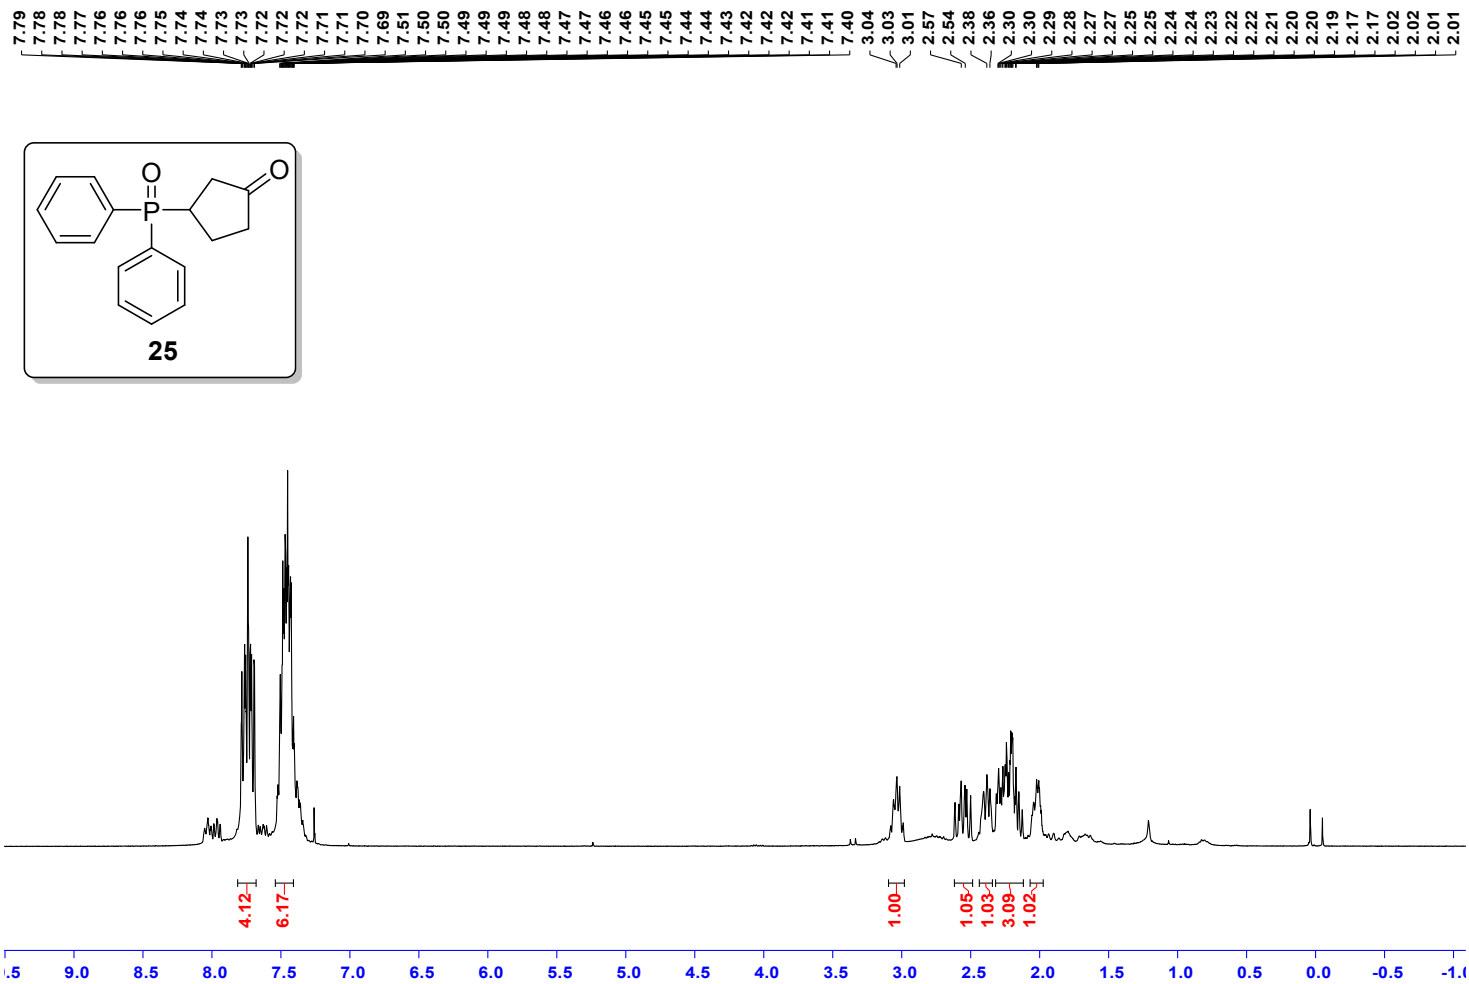

**<sup>13</sup>C NMR (101 MHz, CDCl<sub>3</sub>) spectra for 25**

lhc-x230820-1.2.fid — 1H NMR (400 MHz, CDCl<sub>3</sub>)

216.18  
216.06

132.11  
132.08  
130.95  
130.86  
130.77  
130.68  
128.93  
128.81

38.06  
38.00  
37.93  
37.91  
35.57  
34.80  
22.51  
22.49

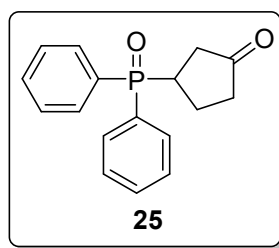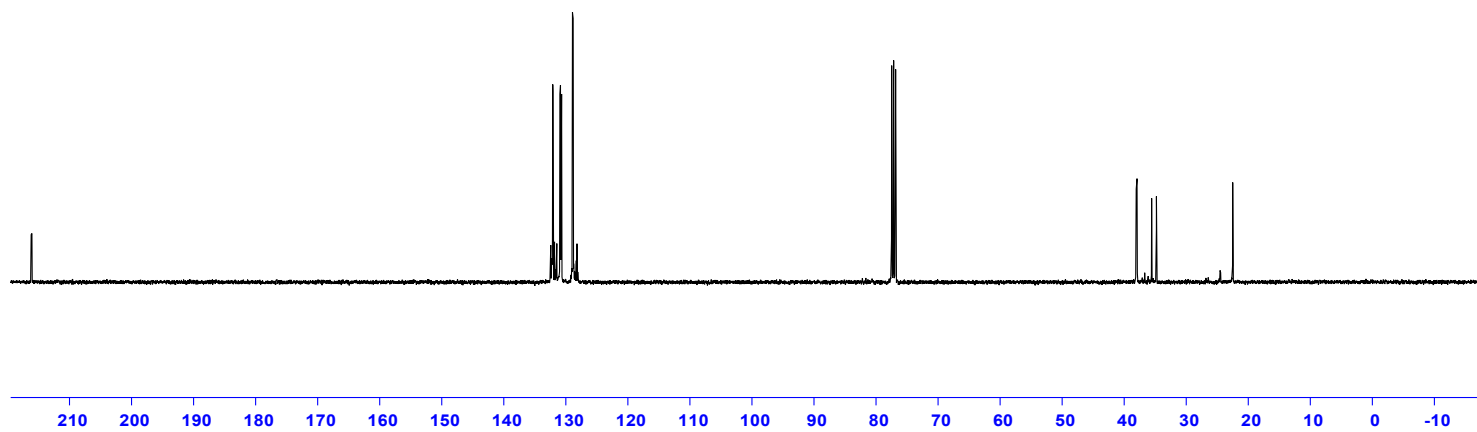



**<sup>31</sup>P NMR (162 MHz, CDCl<sub>3</sub>) spectra for 25**

lhc-x230820-1.3.fid — 1H NMR (400 MHz, CDCl<sub>3</sub>)

— 32.21

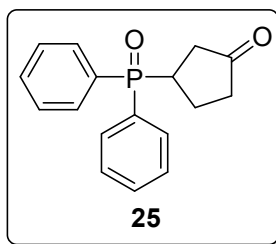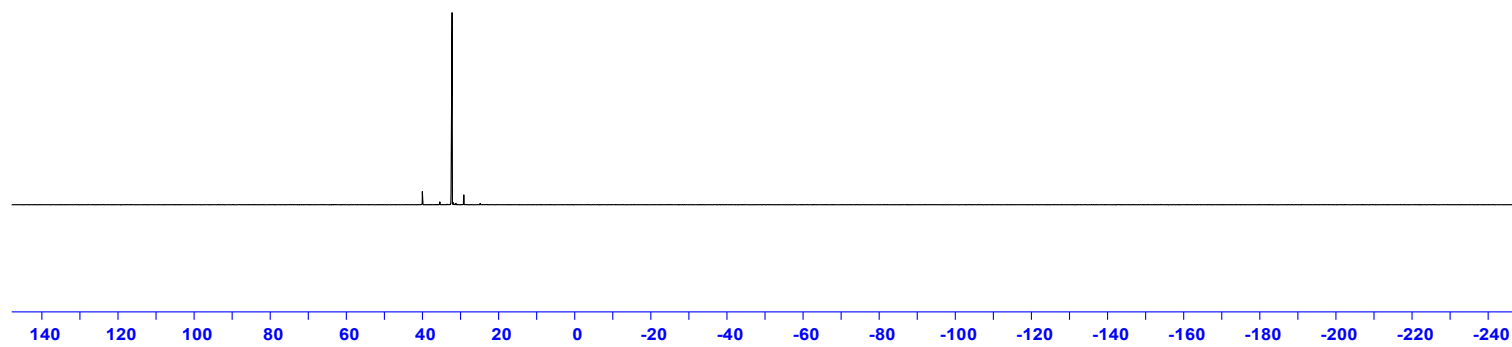

**<sup>1</sup>H NMR (400 MHz, CDCl<sub>3</sub>) spectra for 26**

lhc-x230406-3.1.fid — <sup>1</sup>H NMR (400 MHz, CDCl<sub>3</sub>)

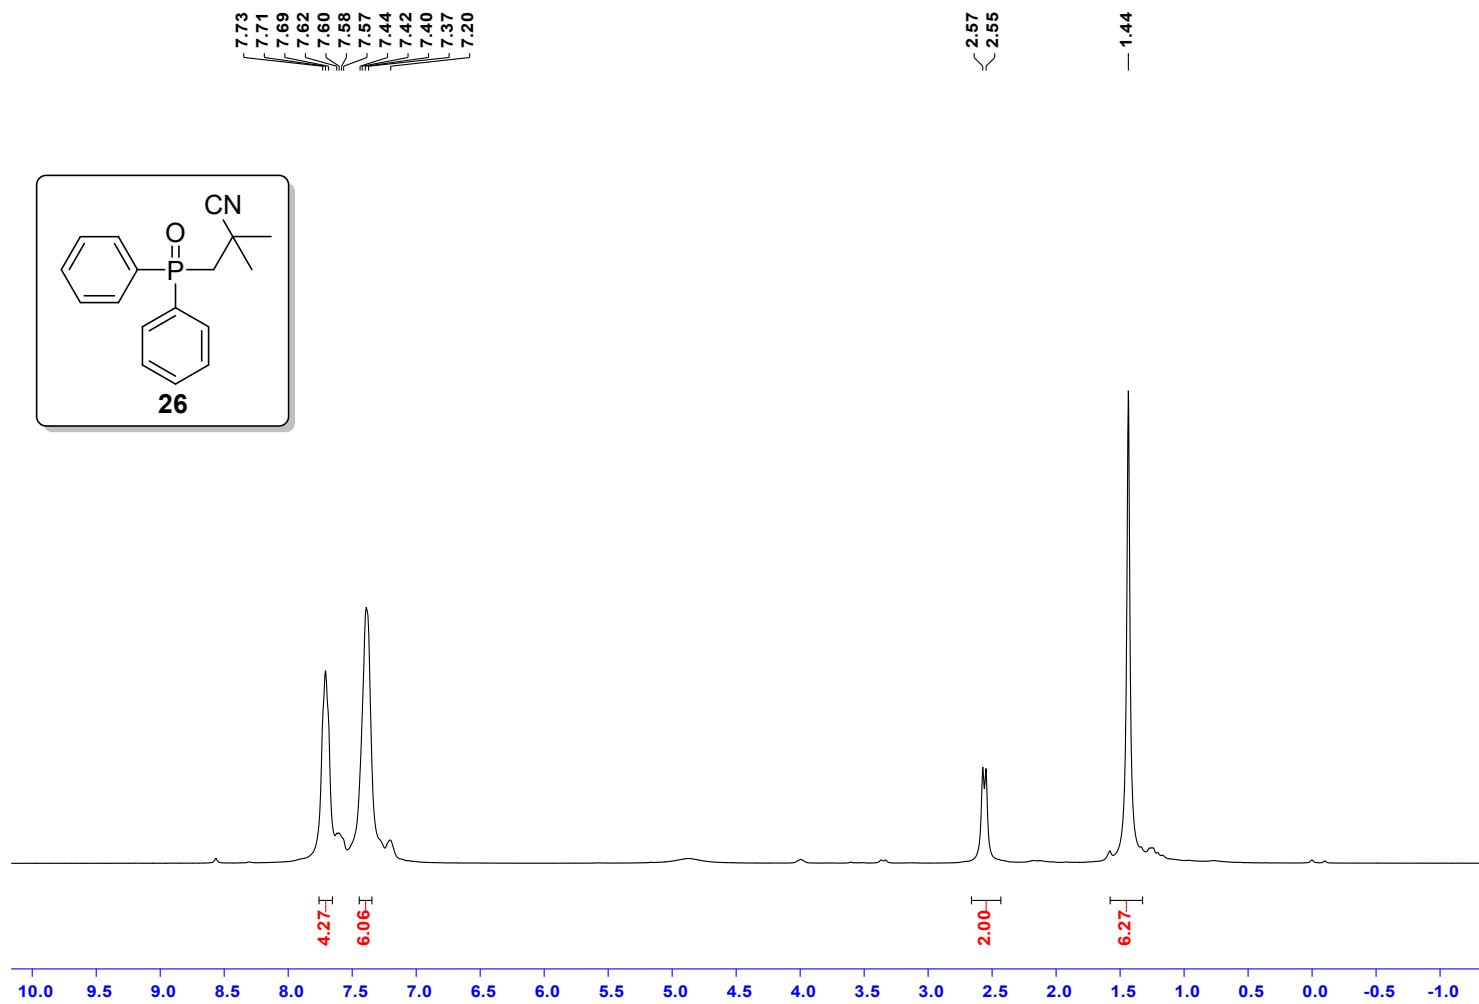

**$^{13}\text{C}$  NMR (101 MHz,  $\text{CDCl}_3$ ) spectra for 26**

lhc-x230406-3.11.fid —  $^1\text{H}$  NMR (400 MHz,  $\text{CDCl}_3$ )

133.29  
132.29  
132.17  
132.14  
130.73  
130.63  
128.89  
128.77  
123.94  
123.85

39.58  
38.89  
30.48  
30.44  
28.38  
28.33

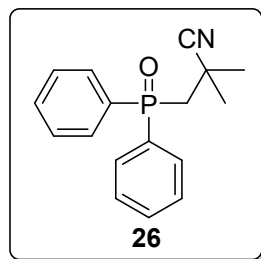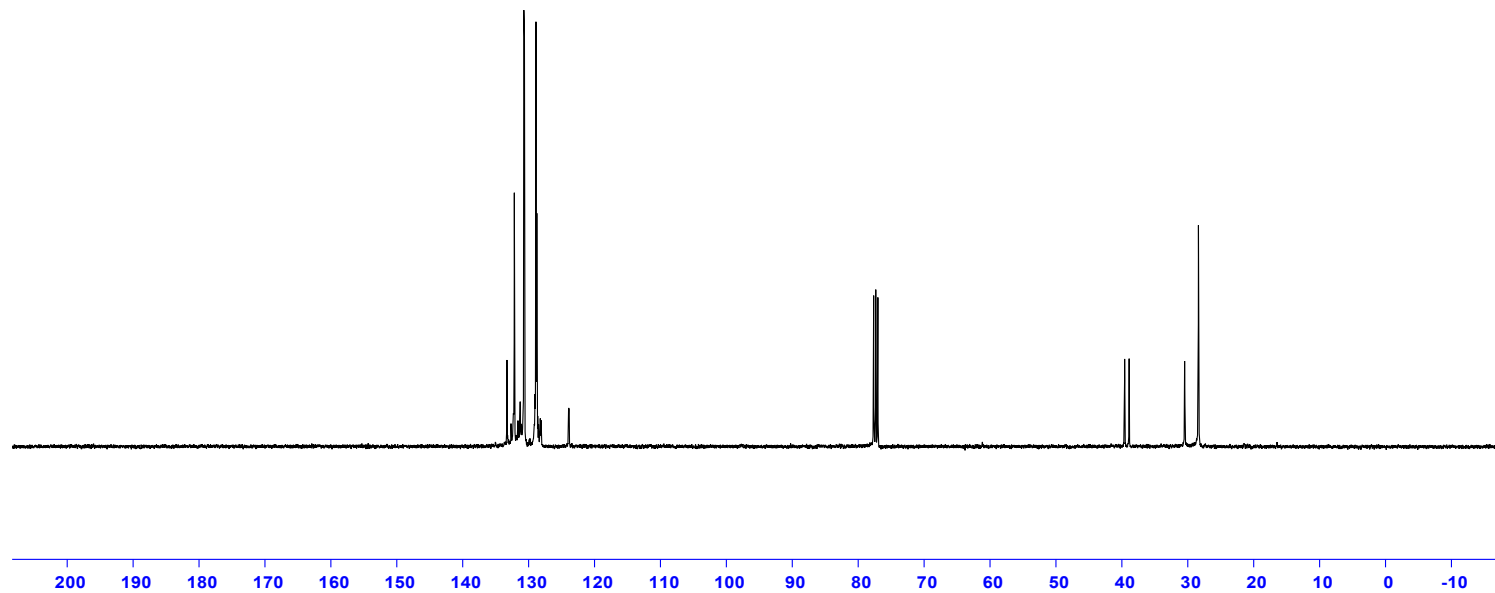

**<sup>31</sup>P NMR (162 MHz, CDCl<sub>3</sub>) spectra for 26**

lhc-x230406-3.2.fid — 1H NMR (400 MHz, CDCl<sub>3</sub>)

— 26.21

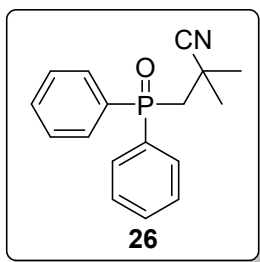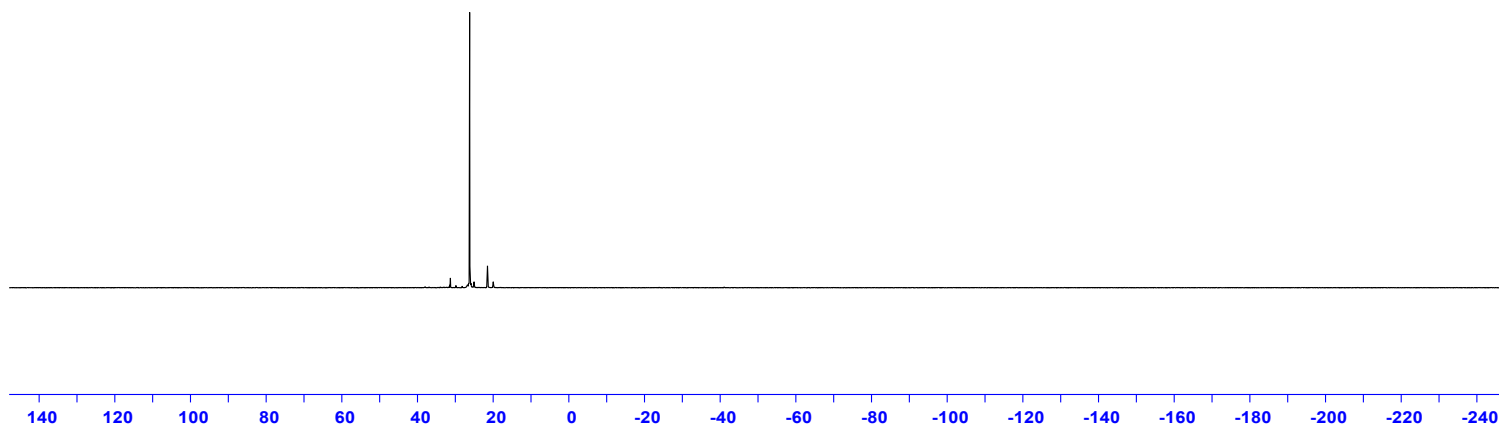

**<sup>1</sup>H NMR (500 MHz, CDCl<sub>3</sub>) spectra for 27**

lhc-x230822-3.1.fid — 1H NMR (400 MHz, CDCl<sub>3</sub>)

7.83  
7.82  
7.81  
7.80  
7.80  
7.79  
7.78  
7.58  
7.57  
7.56  
7.55  
7.54  
7.54  
7.53  
7.52  
7.51  
7.50

2.80  
2.79  
2.78  
2.77  
2.77  
2.76  
2.75  
2.75  
2.74  
2.63  
2.61  
2.60  
2.59  
2.59  
2.58  
2.57  
2.56  
1.38  
1.37  
1.35  
1.33

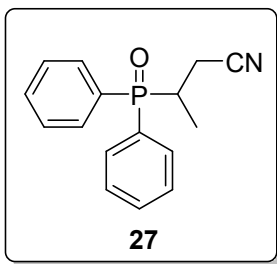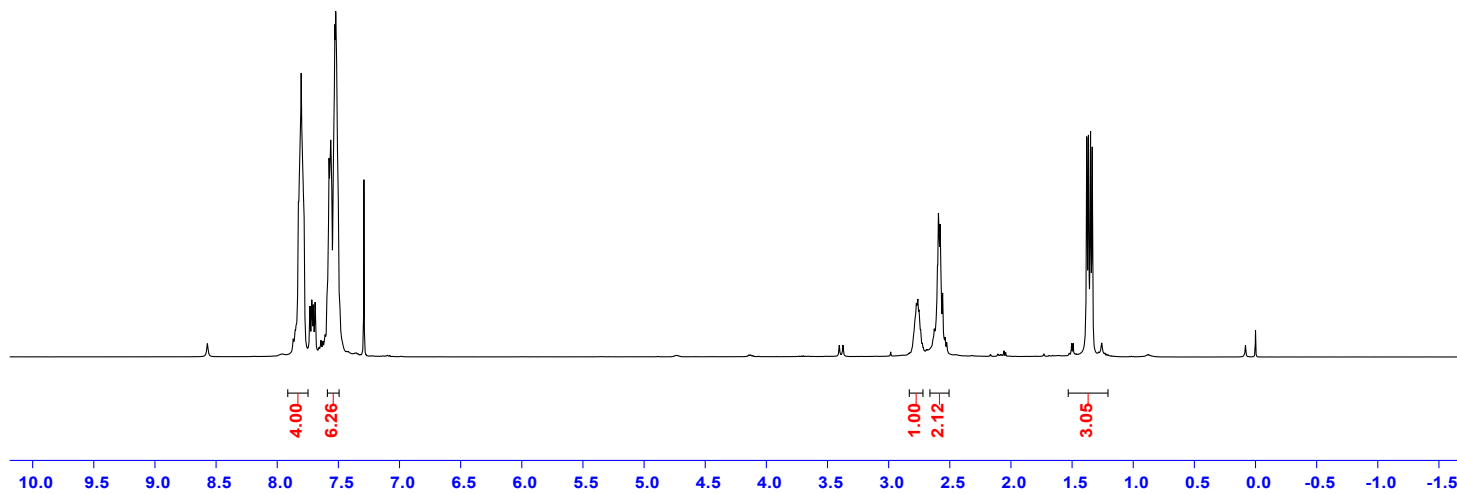

**<sup>13</sup>C NMR (126 MHz, CDCl<sub>3</sub>) spectra for 27**

lhc-x230822-3.2.fid — 1H NMR (400 MHz, CDCl<sub>3</sub>)

132.64  
132.62  
132.52  
132.50  
132.39  
132.37  
131.04  
130.97  
130.87  
130.80  
130.77  
130.68  
129.23  
129.13  
129.02  
128.93  
118.09  
117.93

30.44  
29.87  
18.58  
18.57  
12.75  
12.74

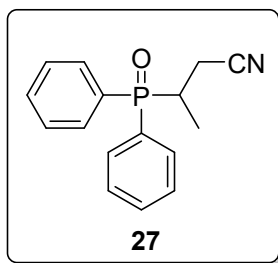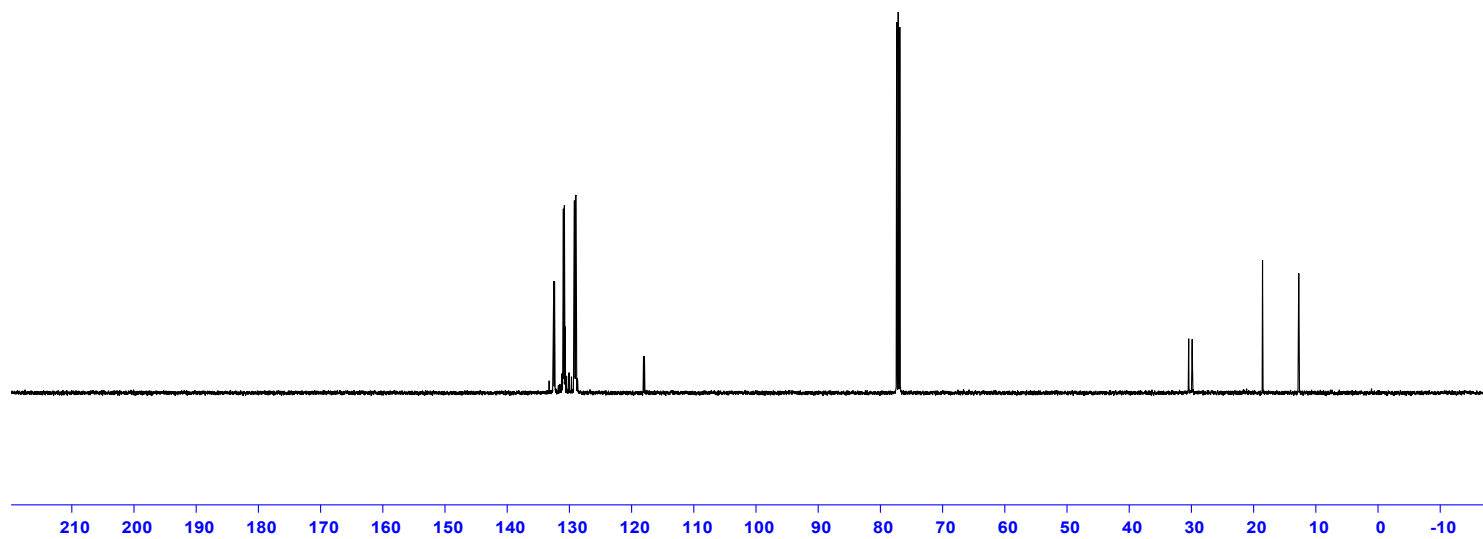

**<sup>31</sup>P NMR (202 MHz, CDCl<sub>3</sub>) spectra for 27**

lhc-x230822-3.3.fid — 1H NMR (400 MHz, CDCl<sub>3</sub>)

— 33.76

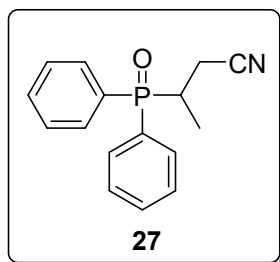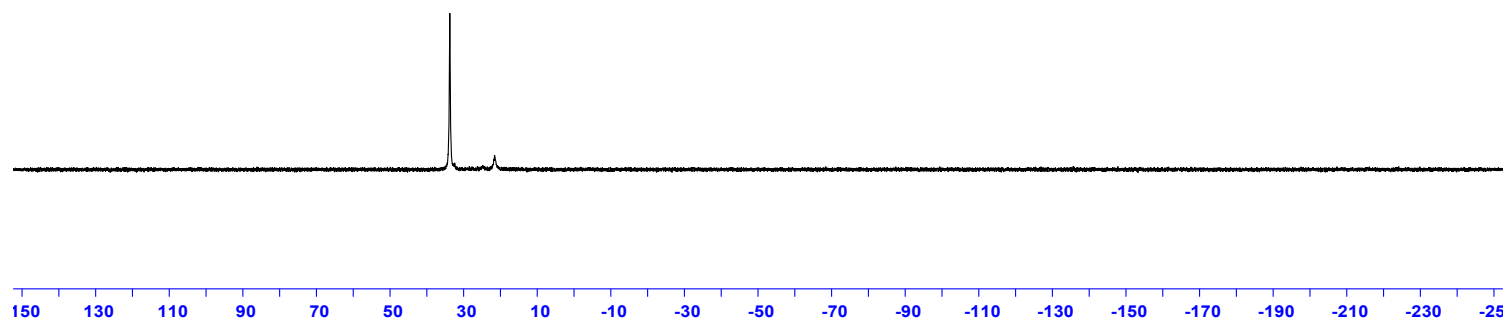

**<sup>1</sup>H NMR (500 MHz, CDCl<sub>3</sub>) spectra for 28**

lhc-x230411-6.1.fid — 1H NMR (400 MHz, CDCl<sub>3</sub>)

7.73  
7.71  
7.70  
7.68  
7.67  
7.66  
7.64  
7.63  
7.62  
7.61  
7.51  
7.51  
7.50  
7.50  
7.49  
7.48  
7.46  
7.44  
7.44  
7.43  
7.41  
7.40  
7.39  
7.39  
7.38  
7.37  
7.36

3.41  
2.92  
2.91  
2.90  
2.89  
2.88  
2.87  
2.86  
2.84  
2.83  
2.82  
2.81  
2.80  
2.79  
2.78  
2.29  
2.28  
2.26  
2.26  
2.25  
2.25  
2.23  
2.22  
1.21  
1.20

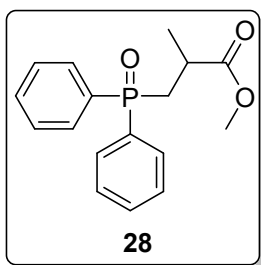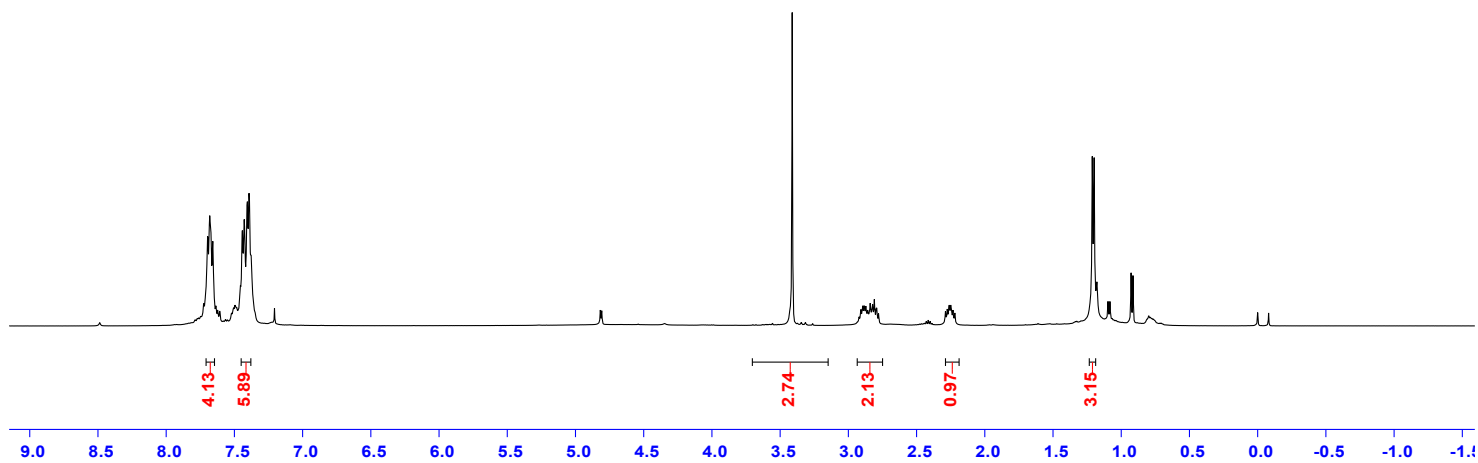



**<sup>13</sup>C NMR (126 MHz, CDCl<sub>3</sub>) spectra for 28**

lhc-x230411-6.2.fid — 1H NMR (400 MHz, CDCl<sub>3</sub>)

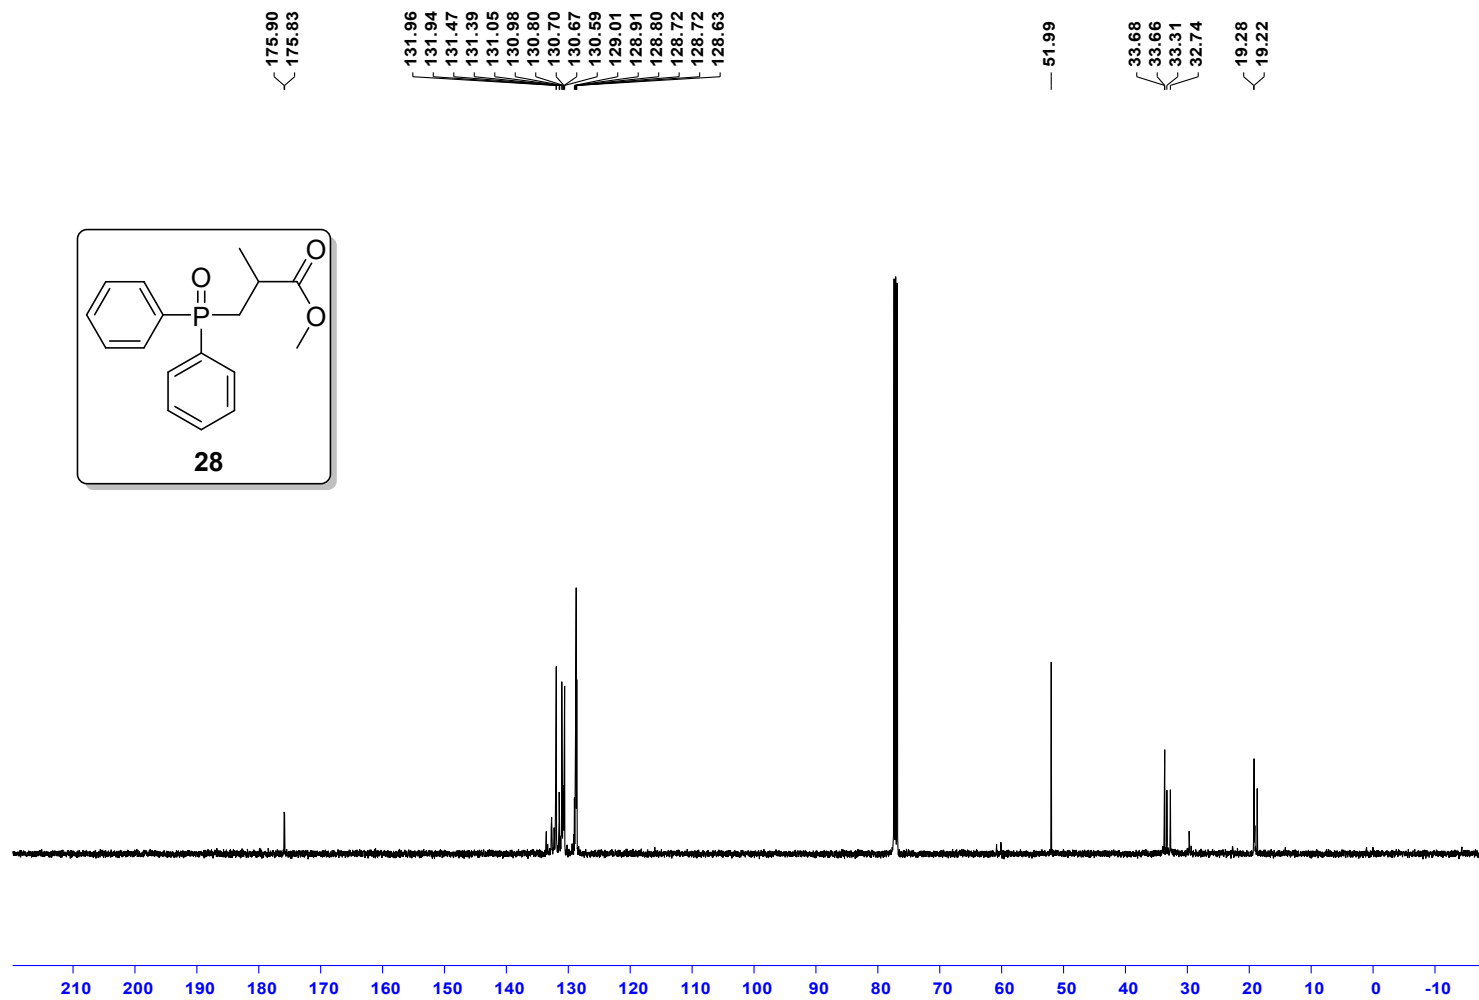

**<sup>31</sup>P NMR (202 MHz, CDCl<sub>3</sub>) spectra for 28**

lhc-x230411-6.3.fid — 1H NMR (400 MHz, CDCl<sub>3</sub>)

30.90  
|

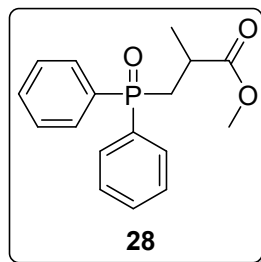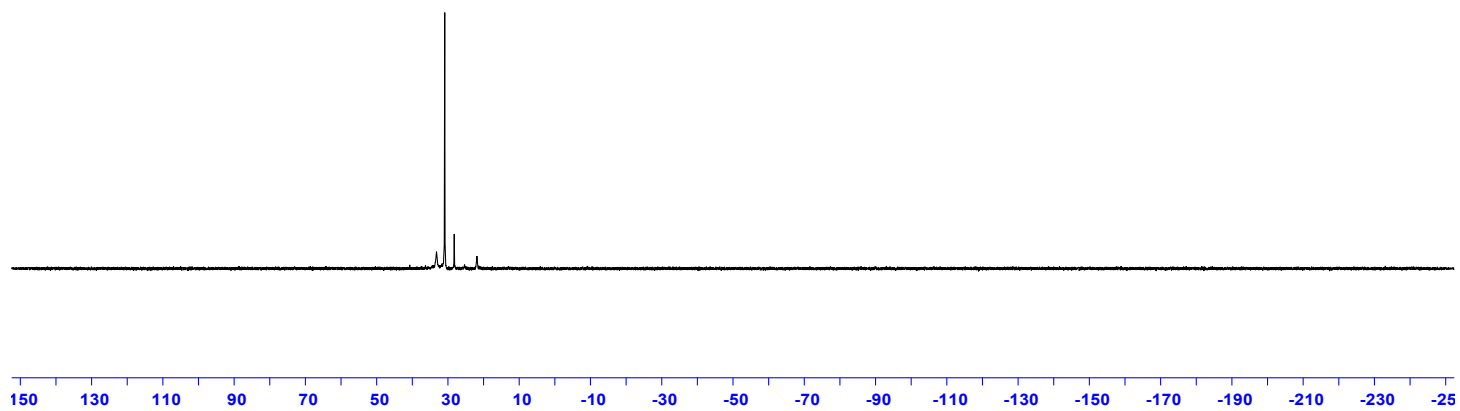

<sup>1</sup>H NMR (400 MHz, CDCl<sub>3</sub>) spectra for 29

lhc-x230406-1.1.fid — 1H NMR (400 MHz, CDCl<sub>3</sub>)

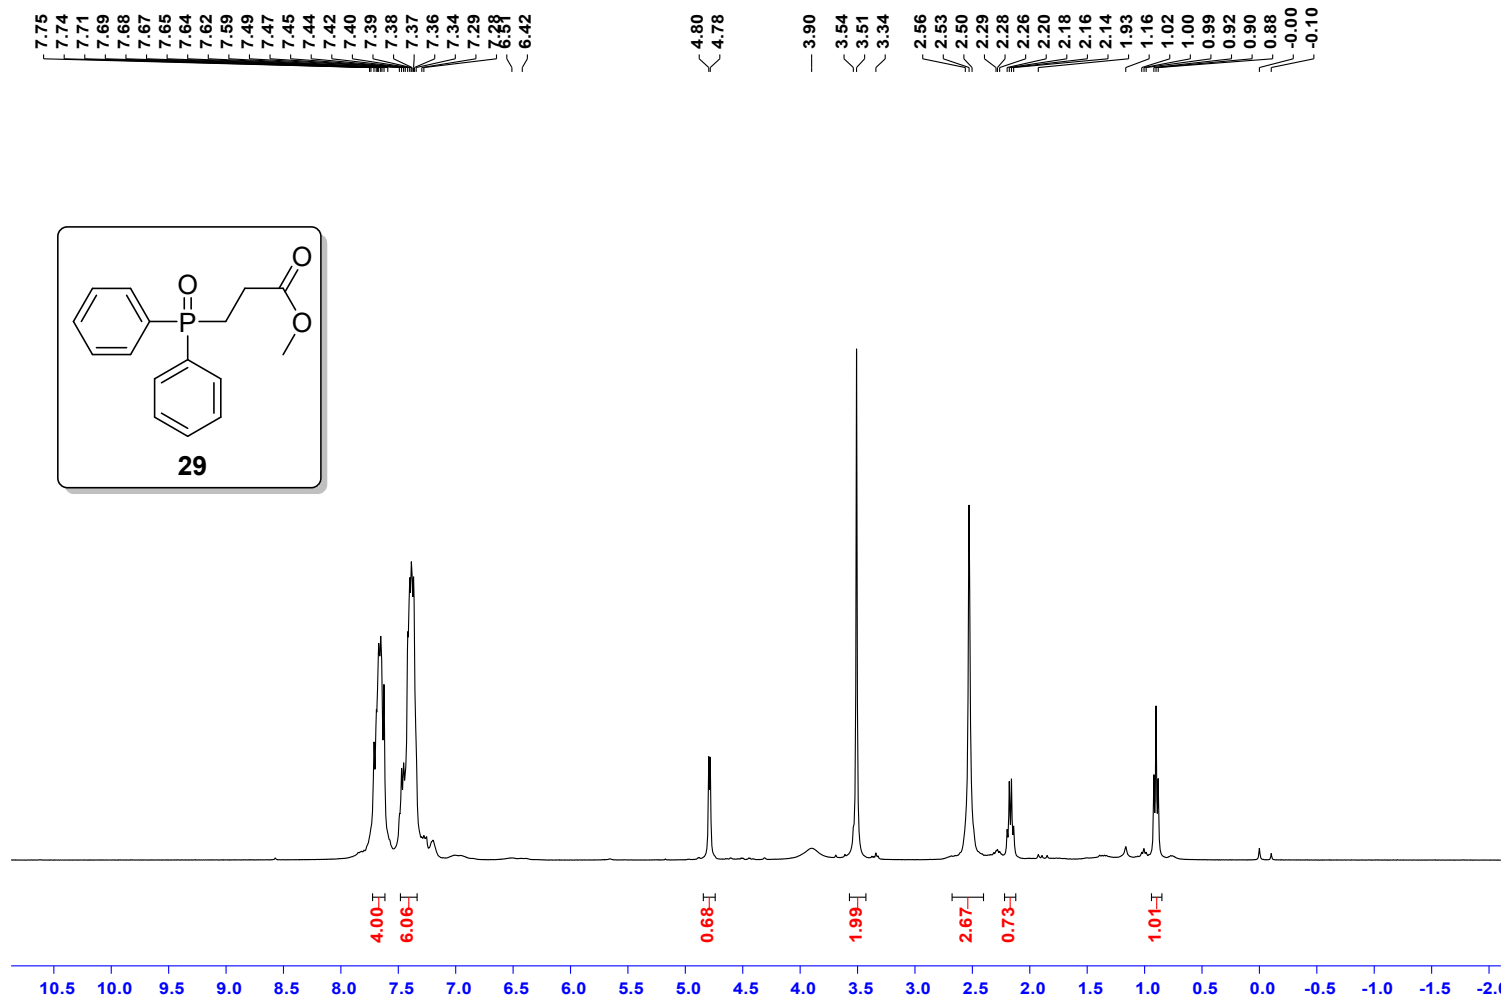

**<sup>13</sup>C NMR (101 MHz, CDCl<sub>3</sub>) spectra for 29**

lhc-x230406-1.10.fid — 1H NMR (400 MHz, CDCl<sub>3</sub>)

172.78  
172.77  
172.63  
172.60

132.74  
132.71  
132.24  
132.22  
132.15  
132.13  
131.43  
131.40  
131.34  
131.31  
130.81  
130.72  
128.92  
128.88  
128.80  
128.76

61.27  
60.83  
60.45  
59.96  
52.07

27.52  
27.17  
26.41  
26.13  
25.20  
25.12  
24.47  
24.39  
9.17  
8.89

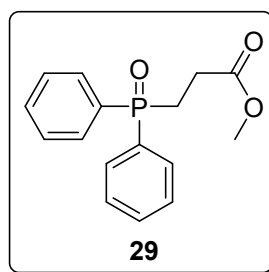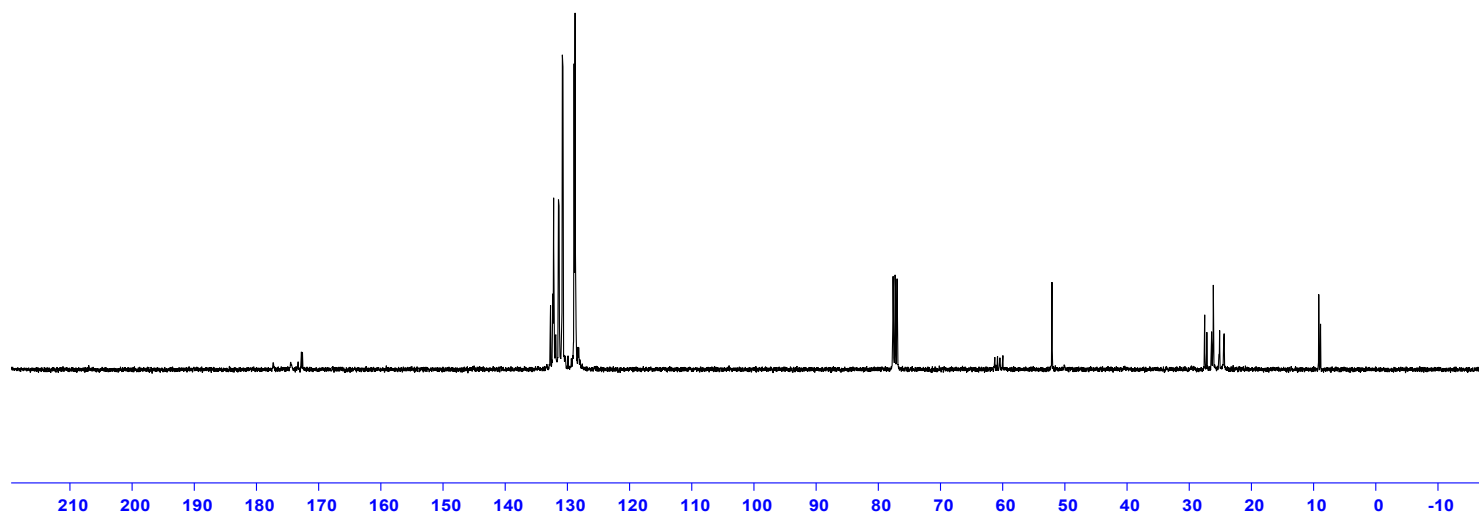

**<sup>31</sup>P NMR (162 MHz, CDCl<sub>3</sub>) spectra for 29**

lhc-x230406-1.2.fid — 1H NMR (400 MHz, CDCl<sub>3</sub>)

31.80  
27.42

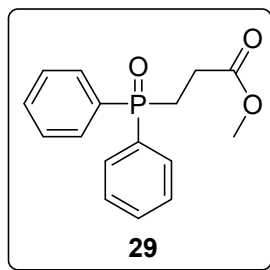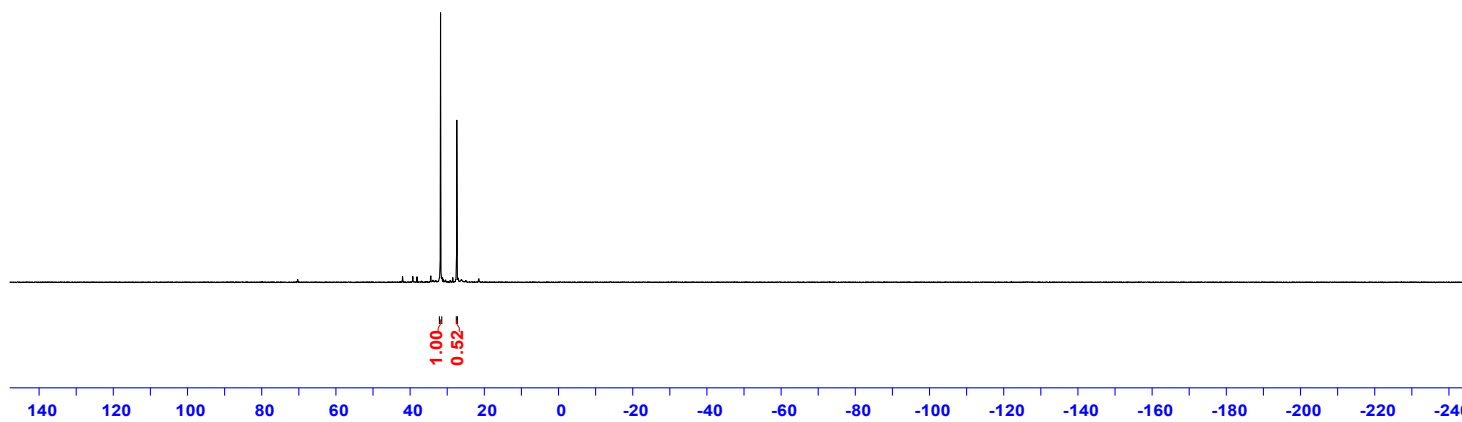

<sup>1</sup>H NMR (400 MHz, CDCl<sub>3</sub>) spectra for 30

lhc-x230812-2.1.fid — 1H NMR (400 MHz, CDCl<sub>3</sub>)

7.67  
7.66  
7.65  
7.64  
7.44  
7.42  
7.41  
7.39  
7.39  
7.38  
7.37  
7.36  
7.36

2.20  
2.19  
2.19  
2.18  
2.17  
2.16  
2.16  
2.15  
1.56  
1.55  
1.54  
1.53  
1.53  
1.52  
1.51  
1.32  
1.30  
1.29  
1.27  
1.20  
1.19  
1.18  
1.17  
1.15  
1.15  
1.14  
0.81  
0.80  
0.79  
0.77

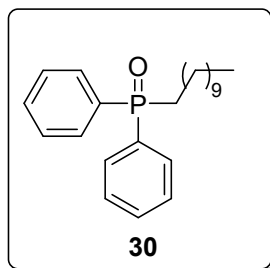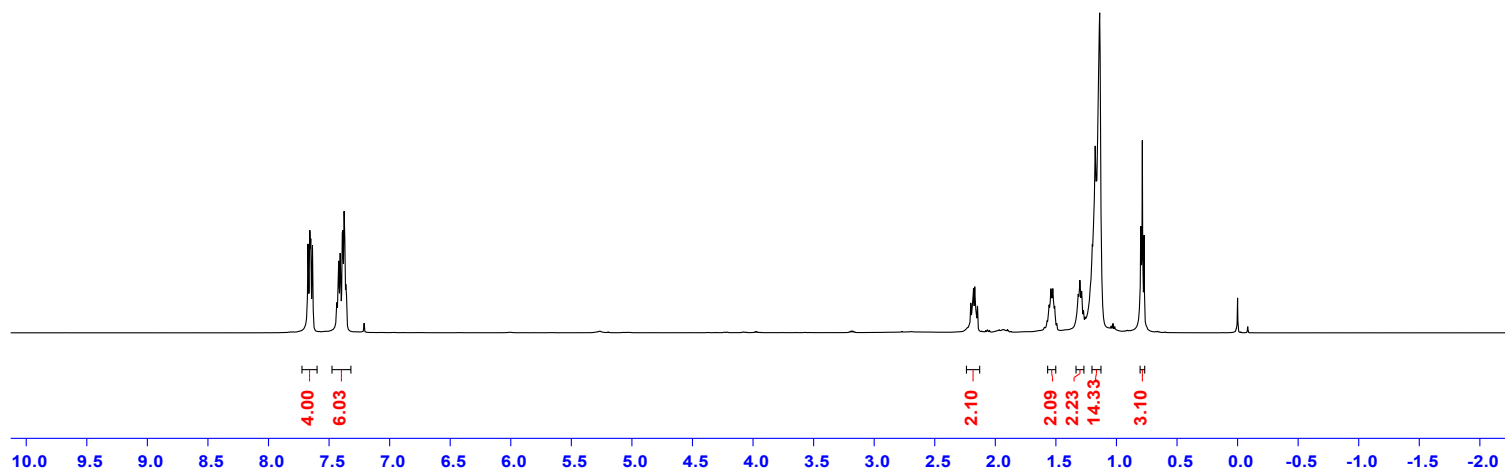

**<sup>13</sup>C NMR (101 MHz, CDCl<sub>3</sub>) spectra for 30**

lhc-x230812-2.2.fid — 1H NMR (400 MHz, CDCl<sub>3</sub>)

133.50  
132.72  
131.65  
131.63  
130.80  
130.73  
128.66  
128.57

31.88  
31.03  
30.92  
29.99  
29.70  
29.55  
29.54  
29.42  
29.35  
29.30  
29.07  
22.68  
21.41  
21.38  
14.13

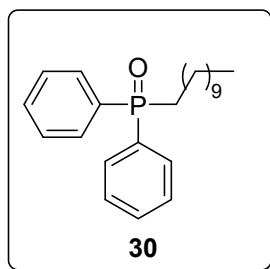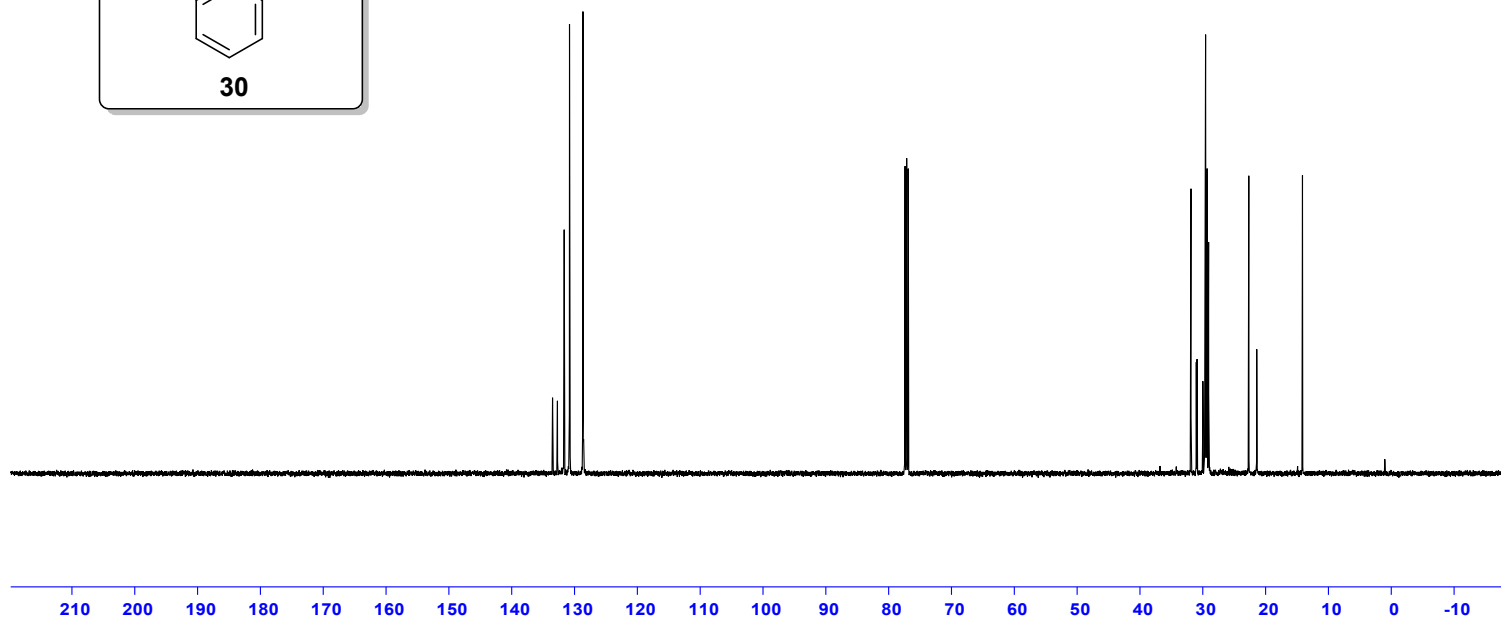

**<sup>31</sup>P NMR (162 MHz, CDCl<sub>3</sub>) spectra for 30**

lhc-x230812-2.3.fid — 1H NMR (400 MHz, CDCl<sub>3</sub>)

— 32.80

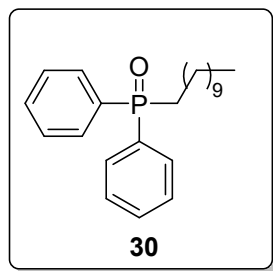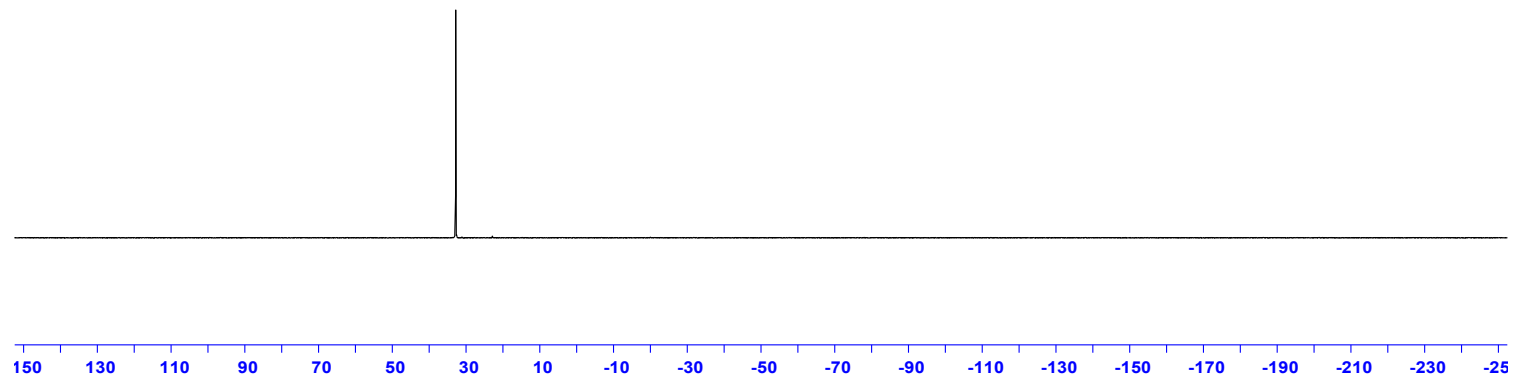

Supplement: d3qo02121a1.pdf [file d3qo02121a1.pdf]
